# Supplementary material for: Dieting alleviates hyperuricemia and organ injuries in uricase-deficient rats via down-regulating cell cycle pathway
Source: PeerJ. 2023 Sep 8;11:e15999. doi: 10.7717/peerj.15999 (PMC10494837; doi:10.7717/peerj.15999)
Supplement: Supplemental Information 2 [file peerj-11-15999-s002.xlsx]

## Sheet: SUA
SUA(ug/mL)
control
day	0	1	2	3
DF4-5-1	46.93	47.3	50.61	45.56
BF12-12-2	58.14	56.23	54.83	62.6
BF12-12-3	56.89	54.62	53.62	52.22
DF4-6-4	83.31	73.51	80.67	80.24
DF4-6-5	63.94	67.48	60.69	68.93
DF4-6-6	76.75	69.53	75.81	82
Mean	64.3267	61.445	62.705	65.2583
SD	13.4987	10.2099	12.5649	14.7194
SUA(ug/mL)
Fasting
day	0	1	2	3
BF12-11-1	86.14	85.47	81.13	115.1
BF4-3-2	57.31	60.76	80.19	85.85
BF4-3-3	46.06	70.18	68.94	111.35
BF4-3-4	51.69	42.24	79.25	95.25
DF4-4-5	59.35	59.6	93.6	120.27
DF4-3-6	58.25	54.6	105.27	91.93
Mean	59.8	62.1417	84.73	103.292
SD	13.8359	14.6298	12.7553	14.0755
SUA(ug/mL)
mean	0	1	2	3
Normal	64.3267	61.445	62.705	65.2583
Fast	59.8	62.1417	84.73	103.292
SUA(ug/mL)
SD
Normal	13.4987	10.2099	12.5649	14.7194
Fast	13.8359	14.6298	12.7553	14.0755
P	0.578898	0.925685	0.0130464	0.00101942
