# Supplementary material for: Dieting alleviates hyperuricemia and organ injuries in uricase-deficient rats via down-regulating cell cycle pathway
Source: PeerJ. 2023 Sep 8;11:e15999. doi: 10.7717/peerj.15999 (PMC10494837; doi:10.7717/peerj.15999)
Supplement: Supplemental Information 3 [file peerj-11-15999-s003.xlsx]

## Sheet: Urine
urine UA (ug/ml)
control	0	1	2
DF4-5-1	912.21	1112.36	937.58
BF12-12-2	978.67	563.52	1118.67
BF12-12-3	1005.33	786.35	645.33
DF4-6-4	791.25	892.65	1118.67
DF4-6-5	1635.11	1245.3	1652.21
DF4-6-6	1116.25	865.12	1005.33
Mean	1073.14	910.883	1079.63
SD	295.483	241.257	330.215
Fasting
	0	1	2
BF12-11-1	775.29	563.25	111.61
BF4-3-2	1098.82	259.21	180.27
BF4-3-3	640.02	310.25	108.27
BF4-3-4	810.59	321.5	89.6
DF4-4-5	1892.09	632.58	344.53
DF4-3-6	1518.67	756.25	573.2
Mean	1122.58	473.84	234.58
SD	489.982	204.442	190.681
mean	0	1	2
Normal	1073.14	910.883	1079.63
Fast	1122.58	473.84	234.58
SD
Normal	295.483	241.257	330.215
Fast	489.982	204.442	190.681
T-test	0.83662	0.00694048	0.000289537
