# Supplementary material for: Dieting alleviates hyperuricemia and organ injuries in uricase-deficient rats via down-regulating cell cycle pathway
Source: PeerJ. 2023 Sep 8;11:e15999. doi: 10.7717/peerj.15999 (PMC10494837; doi:10.7717/peerj.15999)
Supplement: Supplemental Information 4 [file peerj-11-15999-s004.xlsx]

## Sheet: Urine
urine UA (mg)
control	0	1	2
DF4-5-1	37.39	42.49	38.25
BF12-12-2	39.44	21.92	35.35
BF12-12-3	39.21	21.31	23.81
DF4-6-4	22.16	24.64	30.09
DF4-6-5	53.96	31.26	61.78
DF4-6-6	24.89	19.21	25.84
Mean	36.175	26.805	35.8533
SD	11.5015	8.74409	13.8327
Fasting
	0	1	2
BF12-11-1	26.05	10.25	1.74
BF4-3-2	25.16	4.54	2.79
BF4-3-3	19.01	6.24	1.86
BF4-3-4	25.05	5.02	1.17
DF4-4-5	67.73	13.41	7.34
DF4-3-6	43.59	15.5	10.43
Mean	34.4317	9.16	4.22167
SD	18.3014	4.61425	3.77799
mean	0	1	2
Normal	36.175	26.805	35.8533
Fast	34.4317	9.16	4.22167
SD
Normal	11.5015	8.74409	13.8327
Fast	18.3014	4.61425	3.77799
T-test	0.84735	0.00139566	0.00029996
