# Supplementary material for: Dieting alleviates hyperuricemia and organ injuries in uricase-deficient rats via down-regulating cell cycle pathway
Source: PeerJ. 2023 Sep 8;11:e15999. doi: 10.7717/peerj.15999 (PMC10494837; doi:10.7717/peerj.15999)
Supplement: Supplemental Information 5 [file peerj-11-15999-s005.xlsx]

## Sheet: water
control
	0	1	2	3
DF4-5-1		59.2	65.5	63
BF12-12-2		58.8	68.2	58.5
BF12-12-3		50.9	57.3	61.5
DF4-6-4		44.8	67.8	56.1
DF4-6-5		66.9	53.4	63.8
DF4-6-6		41.4	43.7	51.7
Mean	#DIV/0!	53.6667	59.3167	59.1
SD	#DIV/0!	9.68332	9.71667	4.6299
Fasting
	0	1	2	3
BF12-11-1		70.9	24.7	22
BF4-3-2		58.2	30.3	22.4
BF4-3-3		53	25.5	22.7
BF4-3-4		48.9	24.5	20.4
DF4-4-5		61.1	21.3	22.1
DF4-3-6		45.4	21.1	18.9
Mean		56.25	24.5667	21.4167
SD		9.21146	3.36016	1.4689
mean	0	1	2	3
Normal		53.6667	59.3167	59.1
Fast		56.25	24.5667	21.4167
SD
Normal		9.68332	9.71667	4.6299
Fast		9.21146	3.36016	1.4689
T-test		0.646043	8.70885e-06	3.53548e-09
