# Supplementary material for: Dieting alleviates hyperuricemia and organ injuries in uricase-deficient rats via down-regulating cell cycle pathway
Source: PeerJ. 2023 Sep 8;11:e15999. doi: 10.7717/peerj.15999 (PMC10494837; doi:10.7717/peerj.15999)
Supplement: Supplemental Information 6 [file peerj-11-15999-s006.xlsx]

## Sheet: Urine
control	Urine (mL)
	0	1	2	3
DF4-5-1		41	38.2	40.8
BF12-12-2		40.3	38.9	31.6
BF12-12-3		39	27.1	36.9
DF4-6-4		28	27.6	26.9
DF4-6-5		33	25.1	37.4
DF4-6-6		22.3	22.2	25.7
Mean		33.9333	29.85	33.2167
SD		7.58358	7.00478	6.12517
Fasting
	0	1	2	3
BF12-11-1		33.6	18.2	15.6
BF4-3-2		22.9	17.5	15.5
BF4-3-3		29.7	20.1	17.2
BF4-3-4		30.9	15.6	13.1
DF4-4-5		35.8	21.2	21.3
DF4-3-6		28.7	20.5	18.2
Mean		30.2667	18.85	16.8167
SD		4.45361	2.12673	2.79958
mean		1	2	3
Normal		33.9333	29.85	33.2167
Fast		30.2667	18.85	16.8167
SD
Normal		7.58358	7.00478	6.12517
Fast		4.45361	2.12673	2.79958
T-Test		0.331209	0.00424171	0.000138446
