# Supplementary material for: Dieting alleviates hyperuricemia and organ injuries in uricase-deficient rats via down-regulating cell cycle pathway
Source: PeerJ. 2023 Sep 8;11:e15999. doi: 10.7717/peerj.15999 (PMC10494837; doi:10.7717/peerj.15999)
Supplement: Supplemental Information 7 [file peerj-11-15999-s007.xlsx]

## Sheet: body weight
control	body weight (g)
	0	1	2	3
DF4-5-1	233	237.6	244.2	253.2
BF12-12-2	194.2	192.5	195.6	201.3
BF12-12-3	220.8	212.8	216.3	225.2
DF4-6-4	195.2	196.3	202.5	207.4
DF4-6-5	199.6	204	214.3	221
DF4-6-6	192.1	193.5	200.6	203.4
Mean	205.817	206.117	212.25	218.583
SD	16.9581	17.2123	17.6035	19.5051
Fasting
	0	1	2	3
BF12-11-1	207.5	208.4	179.5	167.5
BF4-3-2	186.2	199.2	170.6	157.8
BF4-3-3	194	193.1	169.4	157.5
BF4-3-4	200.8	191.8	167.4	158.6
DF4-4-5	223.5	208.6	179.3	165.7
DF4-3-6	207.8	207.6	177.4	163.2
Mean	203.3	201.45	173.933	161.717
SD	12.8925	7.81223	5.40654	4.34392
mean	0	1	2	3
Normal	205.817	206.117	212.25	218.583
Fast	203.3	201.45	173.933	161.717
SD
Normal	16.9581	17.2123	17.6035	19.5051
Fast	12.8925	7.81223	5.40654	4.34392
T-Test	0.7782	0.558822	0.000466255	3.84968e-05
