# Supplementary material for: Dieting alleviates hyperuricemia and organ injuries in uricase-deficient rats via down-regulating cell cycle pathway
Source: PeerJ. 2023 Sep 8;11:e15999. doi: 10.7717/peerj.15999 (PMC10494837; doi:10.7717/peerj.15999)
Supplement: Supplemental Information 8 [file peerj-11-15999-s008.xlsx]

## Sheet: 100% dieting
100%dieting	free access to food and wwater
	food consumed (g)
Day	1	2	3	4	5	6	7	8	9	10	11	12	13	14
1	17.8	18.5	17.9	22.5	20.8	22.5	18.2	22.2	22.3	22.5	20.9	22.9	26.1	22.9
2	14.6	21	22	22.1	21	22.3	20.6	18.9	18.6	22.5	21.4	19.6	21.5	18.2
3	18.2	16.9	18	20.5	19.6	19	23.7	17.7	23.8	21.8	20.9	23.2	25.3	19.3
4	17.9	16.8	18.4	17.9	21.7	20.9	21.7	21.5	22.8	17.7	20.6	22.9	22.4	22.4
5	19.2	16.8	17.6	22.6	19.3	24.8	20.1	22	24	21.3	26.2	18.4	25.1	22.7
6	16.7	19.5	19.9	17.9	16.5	23.8	23	23.1	18.6	24.4	25.9	21.8	28.1	25.1
mean	17.4	18.25	18.9667	20.5833	19.8167	22.2167	21.2167	20.9	21.6833	21.7	22.65	21.4667	24.75	21.7667
SD	1.58871	1.74442	1.69312	2.21126	1.85625	2.06632	2.01536	2.11376	2.46935	2.22441	2.64783	2.00566	2.43125	2.54846
