# Supplementary material for: Dieting alleviates hyperuricemia and organ injuries in uricase-deficient rats via down-regulating cell cycle pathway
Source: PeerJ. 2023 Sep 8;11:e15999. doi: 10.7717/peerj.15999 (PMC10494837; doi:10.7717/peerj.15999)
Supplement: Supplemental Information 9 [file peerj-11-15999-s009.xlsx]

## Sheet: SUA
0.25	W0	W1	W2
BF13-4-3	79.06	116.71	138.02
BF13-7-6	58.64	101.36	109.11
BF13-2-3	76.44	126.01	136.82
CF8-18-1	64.24	132.44	104.67
CF8-18-2	71.59	96.02	73.67
BF13-3-8	89.55	77.27	90.82
Mean	73.2533	108.302	108.852
SD	11.0183	20.6346	25.3514
P vs W0		0.0255525	0.0239224
0.5	W0	W1	W2
BF13-6-1	82.59	76.12	111.5
BF13-6-2	84.65	106.41	105.22
BF13-6-3	68.12	104.65	68.56
BF13-6-5	64.94	82.02	95.01
BF13-6-6	77	96.12	83.03
BF13-7-5	84.55	96.36	80.22
Mean	76.975	93.6133	90.59
SD	8.61472	12.164	16.2531
P vs W0		0.0336783	0.0750147
0.6	W0	W1	W2
BF14-5-1	76.43	67.3	60.35
BF14-6-1	62.96	81.43	65.35
BF14-6-2	74.7	76.87	54.7
BF14-7-4	74.71	79.26	76.67
BF14-7-5	65.57	89.04	89.67
BF14-7-6	65.57	86.43	81.67
Mean	69.99	80.055	71.4017
SD	5.90643	7.70361	13.4509
P vs W0		0.113544	0.849439
0.7	W0	W1	W2
CF9-10-1	82.17	79.32	81.95
CF9-11-2	68.02	84.58	64.84
CF9-11-3	67.47	79.32	71.68
CF9-11-4	72.74	79.84	73.26
CF9-11-5	73.01	72.21	73.79
CF9-11-6	80.63	61.68	56.42
Mean	74.0067	76.1583	70.3233
SD	6.19152	8.12013	8.72962
		0.69512	0.422375
P vs W0		0.582719	0.352862
0.75	W0	W1	W2
BF13-3-1	88.69	59.24	47.82
BF13-3-3	84.44	64.15	47.82
BF13-3-4	75.93	58.25	55.44
BF13-3-5	78.87	48.76	66.24
BF13-3-6	48.44	46.8	51.84
BF13-3-7	72.33	88.04	65.39
Mean	74.7833	60.8733	55.7583
SD	14.175	14.8533	8.29606
P vs W0		0.113999	0.0422864
0.8	W0	W1	W2
CF9-7-1	90.31	82.11	75.33
CF9-7-2	68.18	81.93	61.56
CF9-7-3	74.71	78.08	70.84
BF14-3-4	73.53	84.9	73.33
BF14-3-5	63.9	71.11	75.92
BF14-3-6	85.52	76.5	80.74
Mean	76.025	79.105	72.9533
SD	10.1067	4.9467	6.47299
P vs W0		0.473174	0.435328
0.9	W0	W1	W2
DF5-8-1	70.5	65.08	75.08
DF5-8-2	60.92	65.92	67.58
DF5-8-4	93.42	104.25	90.08
CF9-8-1	102.33	79.67	81.28
CF9-8-2	75.33	76.67	85.67
BF14-4-1	63.22	73	61.04
Mean	77.62	77.4317	76.7883
SD	16.7476	14.3495	11.0585
P vs W0		0.972008	0.862804
1	W0	W1	W2
DF4-7-1	68.61	90.93	67.18
CF8-10-2	88.66	90.6	65.41
CF8-10-3	47.6	77.93	69.82
CF8-10-4	68.93	75.27	114.53
CF8-10-5	100.27	67.93	73.94
CF8-10-6	62.93	87.99	90.12
Mean	72.8333	81.775	80.1667
SD	18.8209	9.47738	19.0376
P vs W0		0.385612	0.563695
	W0	W1	W2
25%	73.2533	108.302	108.852
50%	76.975	93.6133	90.59
60%	69.99	80.055	71.4017
70%	74.0067	76.1583	70.3233
75%	74.7833	60.8733	55.7583
80%	76.025	79.105	72.9533
90%	77.62	77.4317	76.7883
100%	72.8333	81.775	80.1667
SD	W0	W1	W2
25%	11.0183	20.6346	25.3514
50%	8.61472	12.164	16.2531
60%	5.90643	7.70361	13.4509
70%	6.19152	8.12013	8.72962
75%	14.175	14.8533	8.29606
80%	10.1067	4.9467	6.47299
90%	16.7476	14.3495	11.0585
100%	18.8209	9.47738	19.0376
	W0	W1	W2
P		VsW0	VsW0
25%		0.0255525	0.0239224
50%		0.0336783	0.0750147
60%		0.113544	0.849439
70%		0.69512	0.422375
75%		0.113999	0.0422864
80%		0.473174	0.435328
90%		0.972008	0.862804
100%		0.385612	0.563695
