# Supplementary material for: Dieting alleviates hyperuricemia and organ injuries in uricase-deficient rats via down-regulating cell cycle pathway
Source: PeerJ. 2023 Sep 8;11:e15999. doi: 10.7717/peerj.15999 (PMC10494837; doi:10.7717/peerj.15999)
Supplement: Supplemental Information 10 [file peerj-11-15999-s010.xlsx]

## Sheet: R-SUA
0.25	W0	W1	W2
BF13-4-3	1	1.47622	1.74576
BF13-7-6	1	1.72851	1.86068
BF13-2-3	1	1.64848	1.7899
CF8-18-1	1	2.06164	1.62936
CF8-18-2	1	1.34125	1.02905
BF13-3-8	1	0.86287	1.01418
Mean	1	1.51983	1.51149
SD	0	0.404735	0.386854
0.5	W0	W1	W2
BF13-6-1	1	0.921661	1.35004
BF13-6-2	1	1.25706	1.243
BF13-6-3	1	1.53626	1.00646
BF13-6-5	1	1.26301	1.46304
BF13-6-6	1	1.24831	1.07831
BF13-7-5	1	1.13968	0.948788
Mean	1	1.22766	1.18161
SD	0	0.199574	0.203419
0.6	W0	W1	W2
BF14-5-1	1	0.880544	0.789611
BF14-6-1	1	1.29336	1.03796
BF14-6-2	1	1.02905	0.732262
BF14-7-4	1	1.0609	1.02623
BF14-7-5	1	1.35794	1.36755
BF14-7-6	1	1.31813	1.24554
Mean	1	1.15665	1.03319
SD	0	0.193374	0.247728
0.7	W0	W1	W2
CF9-10-1	1	0.965316	0.997323
CF9-11-2	1	1.24346	0.953249
CF9-11-3	1	1.17563	1.0624
CF9-11-4	1	1.09761	1.00715
CF9-11-5	1	0.989043	1.01068
CF9-11-6	1	0.764976	0.69974
Mean	1	1.03934	0.95509
SD	0	0.171418	0.129851
0.75	W0	W1	W2
BF13-3-1	1	0.667945	0.539181
BF13-3-3	1	0.759711	0.566319
BF13-3-4	1	0.767154	0.730146
BF13-3-5	1	0.618233	0.839863
BF13-3-6	1	0.966144	1.07019
BF13-3-7	1	1.2172	0.904051
Mean	1	0.832731	0.774958
SD	0	0.222895	0.204533
0.8	W0	W1	W2
CF9-7-1	1	0.909202	0.834127
CF9-7-2	1	1.20167	0.902904
CF9-7-3	1	1.04511	0.9482
BF14-3-4	1	1.15463	0.99728
BF14-3-5	1	1.11283	1.18811
BF14-3-6	1	0.894528	0.944107
Mean	1	1.053	0.969121
SD	0	0.127958	0.120349
0.9	W0	W1	W2
DF5-8-1	1	0.923121	1.06496
DF5-8-2	1	1.08207	1.10932
DF5-8-4	1	1.11593	0.964247
CF9-8-1	1	0.77856	0.794293
CF9-8-2	1	1.01779	1.13726
BF14-4-1	1	1.1547	0.965517
Mean	1	1.01203	1.00593
SD	0	0.140358	0.126162
1	W0	W1	W2
DF4-7-1	1	1.32532	0.979158
CF8-10-2	1	1.02188	0.737762
CF8-10-3	1	1.63718	1.46681
CF8-10-4	1	1.09198	1.66154
CF8-10-5	1	0.677471	0.737409
CF8-10-6	1	1.39822	1.43207
Mean	1	1.19201	1.16912
SD	0	0.335313	0.402186
	W0	W1	W2
25%	1	1.51983	1.51149
50%	1	1.22766	1.18161
60%	1	1.15665	1.03319
70%	1	1.03934	0.95509
75%	1	0.832731	0.774958
80%	1	1.053	0.969121
90%	1	1.01203	1.00593
100%	1	1.19201	1.16912
SD	W0	W1	W2
25%	0	0.404735	0.386854
50%	0	0.199574	0.203419
60%	0	0.193374	0.247728
70%	0	0.171418	0.129851
75%	0	0.222895	0.204533
80%	0	0.127958	0.120349
90%	0	0.140358	0.126162
‘100%	0	0.335313	0.402186
