# Supplementary material for: Dieting alleviates hyperuricemia and organ injuries in uricase-deficient rats via down-regulating cell cycle pathway
Source: PeerJ. 2023 Sep 8;11:e15999. doi: 10.7717/peerj.15999 (PMC10494837; doi:10.7717/peerj.15999)
Supplement: Supplemental Information 11 [file peerj-11-15999-s011.xlsx]

## Sheet: body weight
normal
	0	1	2	3	4	5	6
DF4-7-1	198.8	205.3	208.1	215.4	224.4	238.8	233.9
CF8-10-2	187.6	190.5	196.9	206	214.1	224.4	224.9
CF8-10-3	200.6	211.2	217.2	224.3	234.8	242	246.8
CF8-10-4	215.6	221.8	226.3	232.4	241	251.3	245.5
CF8-10-5	186.6	192	195.2	201.6	210.3	216.3	218.2
CF8-10-6	203.3	207.6	212	222.2	229.3	234.5	239.1
Mean	198.75	204.733	209.283	216.983	225.65	234.55	234.733
SD	10.7703	11.8857	11.9391	11.6465	11.8596	12.5715	11.4134
3/4
	0	1	2	3	4	5	6
CF8-11-1	199.5	212.2	211.6	211.3	218.8	219.5	218.7
CF8-11-2	188.2	209.1	211.3	208.5	215.2	213.2	211.6
CF8-12-3	196	178.2	182.3	179.1	186.5	188.2	190.1
CF8-12-4	192.8	180.8	182	180.2	186	185.7	188.7
CF8-12-5	195.5	188.2	191	189.5	194.1	196.4	198
CF8-12-6	199.8	184.4	189.3	185.1	191.4	191.2	193.1
Mean	195.3	192.15	194.583	192.283	198.667	199.033	200.033
SD	4.36073	14.7539	13.5572	14.1688	14.5659	14.0215	12.3414
2/4
	0	1	2	3	4	5	6
CF8-12-1	182.3	184	178.6	172.9	172.7	167.7	166.9
CF8-12-2	177	172.9	171.7	164.3	161.5	151.9	151.4
CF8-11-3	221.5	224.2	222.7	220.6	224	220.1	217.1
CF8-11-4	235.6	235	231.7	224.7	228.2	221.8	221.1
CF8-12-5	188.9	181.3	183.5	177.8	178	175.7	174
CF8-15	194	174.9	171.4	165.3	162	158.3	157.1
Mean	199.883	195.383	193.267	187.6	187.733	182.583	181.267
SD	23.371	27.0291	26.8224	27.6323	30.4104	30.8074	30.3512
1/4	0	1	2	3	4	5	6
CF8-14-1	203.3	186.9	183	175.6	165.3	158.9	152.4
CF8-14-2	192.7	173.7	167.6	154.6	144.8	136.7	128.7
CF8-14-3	196.4	181	176.5	169.3	160.2	152.4	145.2
CF8-14-4	206.3	193.8	187.3	178.3	171	163.1	156.1
CF8-14-5	207.2	191.2	190.9	182.7	172.4	162.6	157.8
CF8-14-6	191.8	182	174.8	162.6	155.5	148.1	144.3
Mean	199.617	184.767	180.017	170.517	161.533	153.633	147.417
SD	6.85607	7.37365	8.65041	10.5105	10.393	10.165	10.705
mean	0	1	2	3	4	5	6
4/4	198.75	204.733	209.283	216.983	225.65	234.55	234.733
3/4	195.3	192.15	194.583	192.283	198.667	199.033	200.033
2/4	199.883	195.383	193.267	187.6	187.733	182.583	181.267
1/4	199.617	184.767	180.017	170.517	161.533	153.633	147.417
SD	0	1	2	3	4	5	6
4/4	10.7703	11.8857	11.9391	11.6465	11.8596	12.5715	11.4134
3/4	4.36073	14.7539	13.5572	14.1688	14.5659	14.0215	12.3414
2/4	23.371	27.0291	26.8224	27.6323	30.4104	30.8074	30.3512
1/4	6.85607	7.37365	8.65041	10.5105	10.393	10.165	10.705
