# Supplementary material for: Dieting alleviates hyperuricemia and organ injuries in uricase-deficient rats via down-regulating cell cycle pathway
Source: PeerJ. 2023 Sep 8;11:e15999. doi: 10.7717/peerj.15999 (PMC10494837; doi:10.7717/peerj.15999)
Supplement: Supplemental Information 12 [file peerj-11-15999-s012.xlsx]

## Sheet: SUA
SUA		W0	W1	W2
		SUA(ug/ml)	SUA(ug/ml)	SUA(ug/ml)
		100.5	82.21	52.98
		90.89	81.5	37.22
		98.86	59	49.14
		94.84	65.07	60.2
		57.01	52.57	48.75
		53.73	50.4	23.37
	mean	82.6383	65.125	45.2767
	SD	21.4087	13.9428	13.0679
	T1		0.0334862	0.00289374
										W0	W1	W2
									mean	82.6383	65.125	45.2767
										W0	W1	W2
									SD	21.4087	13.9428	13.0679
