# Supplementary material for: Dieting alleviates hyperuricemia and organ injuries in uricase-deficient rats via down-regulating cell cycle pathway
Source: PeerJ. 2023 Sep 8;11:e15999. doi: 10.7717/peerj.15999 (PMC10494837; doi:10.7717/peerj.15999)
Supplement: Supplemental Information 13 [file peerj-11-15999-s013.xlsx]

## Sheet: UUA
UUA(ug/ml)
		W0	W1	W2
		1791.27	844.29	896.92
		1565.41	815.71	420.01
		2010.42	739	912.31
		1764.7	972.86	520.13
		1751.41	837.14	473.85
		1288.29	1030	412.31
	mean	1695.25	873.167	605.922
	SD	244.542	107.675	234.694
	T1		0.00175085	1.9669e-05
										W0	W1	W2
									mean	1695.25	873.167	605.922
										W0	W1	W2
									SD	244.542	107.675	234.694
