# Supplementary material for: Dieting alleviates hyperuricemia and organ injuries in uricase-deficient rats via down-regulating cell cycle pathway
Source: PeerJ. 2023 Sep 8;11:e15999. doi: 10.7717/peerj.15999 (PMC10494837; doi:10.7717/peerj.15999)
Supplement: Supplemental Information 14 [file peerj-11-15999-s014.xlsx]

## Sheet: FUA
FUA(ug/g)
		W0	W1	W2
		182.88	48.86	107.08
		150.99	130.29	122.46
		40.76	48.86	46.31
		127.08	114.57	79.38
		73.93	24.57	97.85
		230.18	50	165.54
	mean	134.303	69.525	103.103
	SD	69.6821	42.3738	40.2609
	T1		0.0888732	0.110356
										W0	W1	W2
									mean	134.303	69.525	103.103
										W0	W1	W2
									SD	69.6821	42.3738	40.2609
