# Supplementary material for: Dieting alleviates hyperuricemia and organ injuries in uricase-deficient rats via down-regulating cell cycle pathway
Source: PeerJ. 2023 Sep 8;11:e15999. doi: 10.7717/peerj.15999 (PMC10494837; doi:10.7717/peerj.15999)
Supplement: Supplemental Information 15 [file peerj-11-15999-s015.xlsx]

## Sheet: UUA-T
UUAT (mg/200g)							body weight (g)				24-h UUA (mg)				24h urine				UUA（ug/ml)
		W0	W1	W2			W0	W1	W2		W0	W1	W2		W0	W1	W2		W0	W1	W2
		62.975	24.7962	21.8281			213.9	207.7	218.6		67.3518	25.7508	23.8581		37.6	30.5	26.6		1791.27	844.29	896.92
		48.8892	22.0418	8.16181			196.6	199.1	207.9		48.0581	21.9426	8.4842		30.7	26.9	20.2		1565.41	815.71	420.01
		70.0983	21.9147	21.0819			215.1	208.4	220.7		75.3907	22.8351	23.2639		37.5	30.9	25.5		2010.42	739	912.31
		57.248	29.7435	13.8736			197.9	188.4	200.2		56.6469	28.0184	13.8875		32.1	28.8	26.7		1764.7	972.86	520.13
		49.127	27.2091	14.8842			208.2	200.6	213.3		51.1412	27.2908	15.874		29.2	32.6	33.5		1751.41	837.14	473.85
		48.4163	20.8388	9.32903			198.5	189.8	198		48.0532	19.776	9.23574		37.3	19.2	22.4		1288.29	1030	412.31
	mean	56.1256	24.424	14.8598
	SD	8.99099	3.49336	5.72184
	T1		0.000484193	4.83776e-06
										W0	W1	W2
									mean	56.1256	24.424	14.8598
										W0	W1	W2
									SD	8.99099	3.49336	5.72184
