# Supplementary material for: Dieting alleviates hyperuricemia and organ injuries in uricase-deficient rats via down-regulating cell cycle pathway
Source: PeerJ. 2023 Sep 8;11:e15999. doi: 10.7717/peerj.15999 (PMC10494837; doi:10.7717/peerj.15999)
Supplement: Supplemental Information 16 [file peerj-11-15999-s016.xlsx]

## Sheet: FUA-T
FUAT (mg/200g)							body weight (g)				24-h FUA (mg)				24-h feces (g)				FUA
		W0	W1	W2			W0	W1	W2		W0	W1	W2		W0	W1	W2		W0	W1	W2
		1.86385	0.414028	0.666188			213.9	207.7	218.6		1.99339	0.429968	0.728144		10.9	8.8	6.8		182.88	48.86	107.08
		1.30561	1.4004	0.753962			196.6	199.1	207.9		1.28341	1.3941	0.783744		8.5	10.7	6.4		150.99	130.29	122.46
		0.28424	0.511107	0.318945			215.1	208.4	220.7		0.3057	0.532574	0.351956		7.5	10.9	7.6		40.76	48.86	46.31
		1.19439	0.900019	0.959538			197.9	188.4	200.2		1.18184	0.847818	0.960498		9.3	7.4	12.1		127.08	114.57	79.38
		0.525535	0.220469	0.605541			208.2	200.6	213.3		0.547082	0.22113	0.64581		7.4	9	6.6		73.93	24.57	97.85
		2.55111	0.479452	1.22065			198.5	189.8	198		2.53198	0.455	1.20844		11	9.1	7.3		230.18	50	165.54
	mean	1.28746	0.654247	0.754137
	SD	0.839645	0.427567	0.309526
	T1		0.152475	0.0854292
										W0	W1	W2
									mean	1.28746	0.654247	0.754137
										W0	W1	W2
									SD	0.839645	0.427567	0.309526
