# Supplementary material for: Dieting alleviates hyperuricemia and organ injuries in uricase-deficient rats via down-regulating cell cycle pathway
Source: PeerJ. 2023 Sep 8;11:e15999. doi: 10.7717/peerj.15999 (PMC10494837; doi:10.7717/peerj.15999)
Supplement: Supplemental Information 17 [file peerj-11-15999-s017.xlsx]

## Sheet: TUA
TUA (mg/200g)							body weight (g)				24-h TUA (mg)				24-h UUA (mg)				24-h FUA (mg)
		W0	W1	W2			W0	W1	W2		W0	W1	W2		W0	W1	W2		W0	W1	W2
		64.8388	25.2101	22.4943			213.9	207.7	218.6		69.3451	26.1807	24.5863		67.3517	25.7507	23.8582		1.99337	0.429943	0.728123
		50.1947	23.4423	8.91559			196.6	199.1	207.9		49.3414	23.3368	9.26775		48.058	21.9427	8.484		1.28343	1.39406	0.783754
		70.3824	22.4258	21.4008			215.1	208.4	220.7		75.6963	23.3676	23.6158		75.3906	22.8351	23.2638		0.305706	0.532543	0.351938
		58.4422	30.6434	14.8297			197.9	188.4	200.2		57.8286	28.8661	14.8446		56.6467	28.0183	13.884		1.18182	0.847829	0.960554
		49.6525	27.4297	15.4896			208.2	200.6	213.3		51.6883	27.512	16.5196		51.1412	27.2909	15.8738		0.547106	0.221143	0.645785
		50.9675	21.3182	10.5496			198.5	189.8	198		50.5852	20.231	10.4441		48.0532	19.776	9.23569		2.53198	0.455	1.20843
	mean	57.413	25.0782	15.6133
	SD	8.69806	3.47471	5.51313
	T1		0.000421366	4.24044e-06
										W0	W1	W2
									mean	57.413	25.0782	15.6133
										W0	W1	W2
									SD	8.69806	3.47471	5.51313
