# Supplementary material for: Dieting alleviates hyperuricemia and organ injuries in uricase-deficient rats via down-regulating cell cycle pathway
Source: PeerJ. 2023 Sep 8;11:e15999. doi: 10.7717/peerj.15999 (PMC10494837; doi:10.7717/peerj.15999)
Supplement: Supplemental Information 18 [file peerj-11-15999-s018.xlsx]

## Sheet: body weight
body weight (g)
		W0	W1	W2
		213.9	207.7	218.6
		196.6	199.1	207.9
		215.1	208.4	220.7
		197.9	188.4	200.2
		208.2	200.6	213.3
		198.5	189.8	198
	mean	205.033	199	209.783
	SD	8.42227	8.52784	9.41816
	T1		0.0194042	0.0315609
										W0	W1	W2
									mean	205.033	199	209.783
										W0	W1	W2
									SD	8.42227	8.52784	9.41816
