# Supplementary material for: Dieting alleviates hyperuricemia and organ injuries in uricase-deficient rats via down-regulating cell cycle pathway
Source: PeerJ. 2023 Sep 8;11:e15999. doi: 10.7717/peerj.15999 (PMC10494837; doi:10.7717/peerj.15999)
Supplement: Supplemental Information 19 [file peerj-11-15999-s019.xlsx]

## Sheet: Water
Water-R (ml/200g)							body weight (g)				water 24h
		W0	W1	W2			W0	W1	W2		W0	W1	W2
		56.288	36.3987	32.022			213.9	207.7	218.6		60.2	37.8	35
		48.3215	38.1718	31.9384			196.6	199.1	207.9		47.5	38	33.2
		51.8828	38.2917	28.4549			215.1	208.4	220.7		55.8	39.9	31.4
		57.7059	53.397	34.6653			197.9	188.4	200.2		57.1	50.3	34.7
		47.9347	39.0828	38.631			208.2	200.6	213.3		49.9	39.2	41.2
		46.2469	32.4552	31.0101			198.5	189.8	198		45.9	30.8	30.7
	mean	51.3966	39.6329	32.787
	SD	4.7314	7.15076	3.49029
	T1		0.00284211	0.000609558
										W0	W1	W2
									mean	51.3966	39.6329	32.787
										W0	W1	W2
									SD	4.7314	7.15076	3.49029
