# Supplementary material for: Dieting alleviates hyperuricemia and organ injuries in uricase-deficient rats via down-regulating cell cycle pathway
Source: PeerJ. 2023 Sep 8;11:e15999. doi: 10.7717/peerj.15999 (PMC10494837; doi:10.7717/peerj.15999)
Supplement: Supplemental Information 20 [file peerj-11-15999-s020.xlsx]

## Sheet: urine
urine-R (ml/200g)							body weight (g)				24-h urine (ml)
		W0	W1	W2			W0	W1	W2		W0	W1	W2
		35.1566	29.3693	24.3367			213.9	207.7	218.6		37.6	30.5	26.6
		31.2309	27.0216	19.4324			196.6	199.1	207.9		30.7	26.9	20.2
		34.8675	29.6545	23.1083			215.1	208.4	220.7		37.5	30.9	25.5
		32.4406	30.5732	26.6733			197.9	188.4	200.2		32.1	28.8	26.7
		28.05	32.5025	31.4112			208.2	200.6	213.3		29.2	32.6	33.5
		37.5819	20.2318	22.6263			198.5	189.8	198		37.3	19.2	22.4
	mean	33.2212	28.2255	24.598
	SD	3.36998	4.30124	4.08863
	T1		0.145993	0.0237539
										W0	W1	W2
									mean	33.2212	28.2255	24.598
										W0	W1	W2
									SD	3.36998	4.30124	4.08863
