# Supplementary material for: Dieting alleviates hyperuricemia and organ injuries in uricase-deficient rats via down-regulating cell cycle pathway
Source: PeerJ. 2023 Sep 8;11:e15999. doi: 10.7717/peerj.15999 (PMC10494837; doi:10.7717/peerj.15999)
Supplement: Supplemental Information 21 [file peerj-11-15999-s021.xlsx]

## Sheet: feces
feces-R (g/200g)							body weight (g)				24-h feces (g)
		W0	W1	W2			W0	W1	W2		W0	W1	W2
		10.1917	8.47376	6.22141			213.9	207.7	218.6		10.9	8.8	6.8
		8.647	10.7484	6.15681			196.6	199.1	207.9		8.5	10.7	6.4
		6.9735	10.4607	6.88718			215.1	208.4	220.7		7.5	10.9	7.6
		9.39869	7.85563	12.0879			197.9	188.4	200.2		9.3	7.4	12.1
		7.10855	8.97308	6.18847			208.2	200.6	213.3		7.4	9	6.6
		11.0831	9.58904	7.37374			198.5	189.8	198		11	9.1	7.3
	mean	8.90042	9.35009	7.48592
	SD	1.65335	1.13041	2.30644
	T1		0.651948	0.2279
										W0	W1	W2
									mean	8.90042	9.35009	7.48592
										W0	W1	W2
									SD	1.65335	1.13041	2.30644
