# Supplementary material for: Dieting alleviates hyperuricemia and organ injuries in uricase-deficient rats via down-regulating cell cycle pathway
Source: PeerJ. 2023 Sep 8;11:e15999. doi: 10.7717/peerj.15999 (PMC10494837; doi:10.7717/peerj.15999)
Supplement: Supplemental Information 22 [file peerj-11-15999-s022.xlsx]

## Sheet: Fast-Uox
						Fast 3/4																				UOX-/-
UA(ug/g)	heart	liver	spleen	lung	kidney	adrenal gland	stomach	duodenum	ileum	colon	pancreas	brain	skeleton	thymus	blood	serum		UA(ug/g)	heart	liver	spleen	lung	kidney	adrenal gland	stomach	duodenum	ileum	colon	pancreas	brain	skeleton	thymus	blood	serum
DF6-5-1	53.6548	763.717	232.567	753.824	1080.75	3736.69	178.968	1080.75	1031.48	393.25	538.283	27.9803	130.451	763.946		52.9846		DF6-4-1	1076.23	1687.65	1974.03	1826.31	4525.61	941.282	1716.48	344.734	543.063	110.619	4299.85	148.645	300.448	1081.33	107.192	59.671
DF6-5-2	42.9693	1252.17	1039.5	497.75	1149.5	2321	621.5	1954.33	872.667	448.25	757.167	28.6462	115.368	733.779		37.2154		DF6-4-2	609.869	1711.5	1738.58	1014.79	4229.83	1885.54	1592.25	1857.71	630.625	580.373	2708.36	179.139	577.626	1177.42	105.126	70.5856
DF6-5-3	86.3543	763.717	570.718	990.53	490.437	3917.03	708.738	283.25	1662.69	489.5	1642.91	31.9774	432.115	658.363		49.1385		DF6-4-3	452.727	1509.3	1850.78	1349.58	2636.72	2067.66	1617.7	1529.79	2261.59	555.567	1418.68	157.773	618.502	1117.9	98.9894	41.7997
DF6-4-5	33.9831	718.63	1247.02	280.413	915.75	2113.56	100.066	915.75	580.611	90.75	1282.21	45.9676	137.993	748.862		64.5231		DF6-5-4	1230.34	2347.28	1243.18	938.026	4141.73	2411.94	2455.3	1816.75	2989.07	1401.4	1761.86	134.353	434.877	912.735	148.432	40.8515
DF6-6-7	57.2924	583	723.25	341.917	1397	1624.33	690.25	1532.67	377.667	283.25	353.833	114.585	311.45	582.947		48.7538		DF6-6-3	169.59	2974.75	2401.74	1442.99	4553.64	2173.29	1963.03	1804.04	1678.63	1921.91	2622.33	132.355	173.536	587.807	140.946	73.588
DF6-6-8	171.877	610.5	420.75	506.917	1782	1422.67	470.25	891	506	420.75	573.833	171.877	190.784	982.652		23.3692		DF6-6-4	416.801	2380.91	2012.75	1031.73	2451.87	1734.73	2628.43	2139.37	687.722	807.399	2095.09	120.216	756.291	932.748	117.499	110.091
																			heart	liver	spleen	lung	kidney	adrenal gland	stomach	duodenum	ileum	colon	pancreas	brain	skeleton	thymus	blood	serum
Mean	74.3552	781.955	705.634	561.892	1135.91	2522.55	461.629	1109.62	838.519	354.292	858.04	70.1722	219.693	745.092	#DIV/0!	45.9974		Mean	659.26	2101.9	1870.18	1267.24	3756.57	1869.07	1995.53	1582.07	1465.12	896.212	2484.36	145.413	476.88	968.322	119.697	66.0978
SD	50.9689	242.798	381.583	266.58	436.791	1062.37	264.42	576.474	470.56	146.66	498.671	59.7757	126.413	134.718	#DIV/0!	14.1325		SD	410.77	561.266	380.656	339.944	954.499	511.04	446.379	636.339	1015.21	655.456	1017.29	21.111	215.957	213.546	20.394	25.6154
P	0.00610899	0.000354056	0.000351338	0.00252095	0.000113369	0.204381	2.7846e-05	0.207471	0.200158	0.0763371	0.00557352	0.0156382	0.030516	0.0555784	#DIV/0!	0.123292

## Sheet: figure
UA		mean			SD
ug/g		Control	75% dieting		Control	0.75	P
5	kidney	3756.57	1135.91		954.499	436.791	0.000203611	1
2	liver	2101.9	781.955		561.266	242.798	0.000119184	2
11	pancreas	2484.36	858.04		1017.29	498.671	0.0255467	3
7	stomach	1995.53	461.629		446.379	264.42	7.02033e-05	4
3	spleen	1870.18	705.634		380.656	381.583	0.000101293	5
8	jejunum	1582.07	1109.62		636.339	576.474	0.167712	6
6	adrenal gland	1869.07	2522.55		511.04	1062.37	0.077939	7
9	ileum	1465.12	838.519		1015.21	470.56	0.157214	8
4	lung	1267.24	561.892		339.944	266.58	0.00833147	9
10	colon	896.212	354.292		655.456	146.66	0.0526026	10
14	thymus	968.322	745.092		213.546	134.718	0.497222	11
1	heart	659.26	74.3552		410.77	50.9689	0.000632318	12
13	skeleton muscle	476.88	219.693		215.957	126.413	0.0292603	13
12	brain	145.413	70.1722		21.111	59.7757	0.00467528	14
UA index		mean			SD
n/SUA		Uox-/-	Fast(75%)		Uox-/-	Fast(75%)	P
5	kidney	62.2973	30.0611		33.8628	24.0203	0.0546869	1
2	liver	38.7303	18.8037		20.8027	9.04916	0.0234135	2
11	pancreas	36.4374	19.2706		27.5369	9.56435	0.165579	3
7	stomach	32.7579	11.7221		17.6845	7.50548	0.00627487	4
3	spleen	31.2752	16.017		15.5445	7.91017	0.019236	5
8	jejunum	25.4416	27.0721		10.4417	17.0471	0.715763	6
6	adrenal gland	26.3984	56.5927		12.5336	19.4438	0.00168322	7
9	ileum	24.9935	19.1918		12.1494	9.73278	0.544288	8
4	lung	19.2803	13.4685		11.1781	6.89704	0.254168	9
10	colon	14.5445	9.10818		7.66421	5.68391	0.155455	10
14	thymus	16.4387	18.8576		11.5126	11.7328	0.590293	11
1	heart	12.3229	2.16355		9.21468	2.57346	0.0241879	12
13	skeleton muscle	7.61504	5.17444		3.82665	2.97947	0.260045	13
12	brain	2.46355	2.06102		0.999446	2.68079	0.757223	14
		mean			SD
N-SUA		Uox-/-	Fast(75%)		Uox-/-	Fast(75%)	P
5	kidney	3414.61	1089.91		1587.59	446.308	0.000242733	1
2	liver	2084.43	735.958		933.715	244.975	0.000162284	2
11	pancreas	1965.65	812.043		1268.3	493.22	0.0282122	3
7	stomach	1799.69	415.631		831.737	271.411	8.93777e-05	4
3	spleen	1722.76	659.637		696.731	376.643	0.00012161	5
8	jejunum	1577.73	1063.63		914.669	579.309	0.177147	6
6	adrenal gland	1606.94	2476.55		937.448	1056.9	0.0704502	7
9	ileum	1617.54	792.522		1113.17	468.595	0.163782	8
4	lung	1005.83	515.894		498.251	267.946	0.0118192	9
10	colon	940.638	308.294		751.119	156.182	0.0547285	10
14	thymus	801.169	699.094		497.936	143.758	0.589071	11
1	heart	616.778	28.3577		373.845	62.6958	0.00110465	12
13	skeleton muscle	397.419	173.696		222.902	126.643	0.0396822	13
12	brain	83.356	24.1748		33.2003	69.5978	0.0465492	14
		mean			SD
Total UA		Uox-/-	Fast(75%)		Uox-/-	Fast(75%)	P
5	kidneys	6966.86	913.884		2038.76	351.417	1.20917e-05	1
2	liver	18977.1	6301.44		5028.49	1956.6	8.40201e-05	2
7	stomach	1900.44	477.94		549.111	273.763	8.63873e-05	4
3	spleen	925.195	327.8		180.447	177.263	4.76094e-05	5
8	small intestine	9320.37	5725.25		4823.78	1503.47	0.10611	6
4	lung	1057.24	521.637		333.574	247.482	0.00636491	9
14	thymus	401.998	293.057		187.456	52.987	0.195664	11
1	heart	572.272	60.2108		265.862	41.2733	0.000580357	12
