# Supplementary material for: Dieting alleviates hyperuricemia and organ injuries in uricase-deficient rats via down-regulating cell cycle pathway
Source: PeerJ. 2023 Sep 8;11:e15999. doi: 10.7717/peerj.15999 (PMC10494837; doi:10.7717/peerj.15999)
Supplement: Supplemental Information 23 [file peerj-11-15999-s023.xlsx]

## Sheet: Cr
Cr (nmol/L)
		W0	W1	W2
		33.7716	40.0192	11.2764
		35.6462	30.0224	3.9034
		39.3954	35.6462	7.5272
		28.2732	26.2732	7.5272
		31.897	31.897	9.4018
		30.0224	33.7716	13.151
	mean	33.1676	32.9383	8.79783
	SD	4.01885	4.73659	3.24477
	T1		0.90606	0.000191892
										W0	W1	W2
									mean	33.1676	32.9383	8.79783
										W0	W1	W2
									SD	4.01885	4.73659	3.24477
