# Supplementary material for: Dieting alleviates hyperuricemia and organ injuries in uricase-deficient rats via down-regulating cell cycle pathway
Source: PeerJ. 2023 Sep 8;11:e15999. doi: 10.7717/peerj.15999 (PMC10494837; doi:10.7717/peerj.15999)
Supplement: Supplemental Information 24 [file peerj-11-15999-s024.xlsx]

## Sheet: BUN
BUN (mmol/L)
		W0	W1	W2
		5.76555	5.23529	4.62981
		6.26794	5.30392	7.85096
		6.45933	4.69608	5.54327
		5.76555	7.66176	4.45192
		4.40191	5.16176	8.42788
		5.01914	5.03922	7.19712
	mean	5.61324	5.51634	6.35016
	SD	0.776037	1.07267	1.70298
	T1		0.862194	0.447981
										W0	W1	W2
									mean	5.61324	5.51634	6.35016
										W0	W1	W2
									SD	0.776037	1.07267	1.70298
