# Supplementary material for: Dieting alleviates hyperuricemia and organ injuries in uricase-deficient rats via down-regulating cell cycle pathway
Source: PeerJ. 2023 Sep 8;11:e15999. doi: 10.7717/peerj.15999 (PMC10494837; doi:10.7717/peerj.15999)
Supplement: Supplemental Information 25 [file peerj-11-15999-s025.xlsx]

## Sheet: Glucose
Glu (mmol/L)
		W0	W1	W2
		7.79385	6.80923	4.92079
		9.85538	4.34769	7.57756
		8.99385	7.74769	6.57096
		9.51692	4.74769	7.79208
		7.67077	6.99385	10.4554
		8.07077	6.64	11.0924
	mean	8.65026	6.21436	8.06821
	SD	0.932753	1.35124	2.33708
	T1		0.0374451	0.62324
										W0	W1	W2
									mean	8.65026	6.21436	8.06821
										W0	W1	W2
									SD	0.932753	1.35124	2.33708
