# Supplementary material for: Dieting alleviates hyperuricemia and organ injuries in uricase-deficient rats via down-regulating cell cycle pathway
Source: PeerJ. 2023 Sep 8;11:e15999. doi: 10.7717/peerj.15999 (PMC10494837; doi:10.7717/peerj.15999)
Supplement: Supplemental Information 26 [file peerj-11-15999-s026.xlsx]

## Sheet: HDL
HDL (mmol/L)
		W0	W1	W2
		1.5178	1.19818	1.10212
		0.753286	1.23862	0.86451
		1.04651	1.15774	1.3094
		0.86451	1.3094	1.1274
		1.14257	0.904954	0.773509
		0.748231	0.80273	0.661173
	mean	1.01215	1.10194	0.97302
	SD	0.294051	0.201211	0.245961
	T1		0.539784	0.764264
										W0	W1	W2
									mean	1.01215	1.10194	0.97302
										W0	W1	W2
									SD	0.294051	0.201211	0.245961
