# Supplementary material for: Dieting alleviates hyperuricemia and organ injuries in uricase-deficient rats via down-regulating cell cycle pathway
Source: PeerJ. 2023 Sep 8;11:e15999. doi: 10.7717/peerj.15999 (PMC10494837; doi:10.7717/peerj.15999)
Supplement: Supplemental Information 27 [file peerj-11-15999-s027.xlsx]

## Sheet: LDL
LDL (mmol/L)
		W0	W1	W2
		1.06304	0.962751	0.977077
		0.776504	0.633238	0.805158
		0.747851	0.676218	1.46418
		0.303725	0.475645	0.848138
		0.403725	0.547278	1.13467
		0.432665	0.647564	0.891117
	mean	0.621251	0.657116	1.02006
	SD	0.289486	0.166994	0.246818
	T1		0.60149	0.0379229
										W0	W1	W2
									mean	0.621251	0.657116	1.02006
										W0	W1	W2
									SD	0.289486	0.166994	0.246818
