# Supplementary material for: Dieting alleviates hyperuricemia and organ injuries in uricase-deficient rats via down-regulating cell cycle pathway
Source: PeerJ. 2023 Sep 8;11:e15999. doi: 10.7717/peerj.15999 (PMC10494837; doi:10.7717/peerj.15999)
Supplement: Supplemental Information 28 [file peerj-11-15999-s028.xlsx]

## Sheet: TC
TC(mmol/L)
		W0	W1	W2
		2.5167	1.72102	1.80943
		1.91749	1.13163	0.660118
		2.56582	1.8666	2.07741
		1.50668	1.26916	1.81925
		1.91749	1.17092	1.04322
		1.87819	1.42633	0.0510806
	mean	2.05039	1.43094	1.24342
	SD	0.410782	0.302436	0.79366
	T1		0.00110853	0.041065
										W0	W1	W2
									mean	2.05039	1.43094	1.24342
										W0	W1	W2
									SD	0.410782	0.302436	0.79366
