# Supplementary material for: Dieting alleviates hyperuricemia and organ injuries in uricase-deficient rats via down-regulating cell cycle pathway
Source: PeerJ. 2023 Sep 8;11:e15999. doi: 10.7717/peerj.15999 (PMC10494837; doi:10.7717/peerj.15999)
Supplement: Supplemental Information 29 [file peerj-11-15999-s029.xlsx]

## Sheet: TG
TG(mmol/L)
		W0	W1	W2
		0.738123	0.303592	0.320973
		0.778679	0.513673	0.210892
		0.714948	0.257242	0.465817
		0.646929	0.31518	0.349942
		0.639629	0.31518	0.303592
		0.70336	0.402086	0.303592
	mean	0.703611	0.351159	0.325801
	SD	0.0534066	0.0923866	0.082947
	T1		9.57288e-05	0.000427217
										W0	W1	W2
									mean	0.703611	0.351159	0.325801
										W0	W1	W2
									SD	0.0534066	0.0923866	0.082947
