# Supplementary material for: Dieting alleviates hyperuricemia and organ injuries in uricase-deficient rats via down-regulating cell cycle pathway
Source: PeerJ. 2023 Sep 8;11:e15999. doi: 10.7717/peerj.15999 (PMC10494837; doi:10.7717/peerj.15999)
Supplement: Supplemental Information 30 [file peerj-11-15999-s030.xlsx]

## Sheet: PKM
Uox	Casp3	Cdk1	Ki67
1	17.2896	1.53374	0.977291
2	18.5835	2.38103	0.936434
3	17.2903	1.94868	1.1467
mean	17.7212	1.95448	1.02014
SD	0.746835	0.423675	0.111493
75% dieting	Casp3	Cdk1	Ki67
1	7.29768	0.082981	0.089875
2	6.01471	0	0.035873
3	5.19184	0.050223	0.01633
mean	6.16808	0.0444013	0.0473593
SD	1.06126	0.0417957	0.0380942
mean	Casp3	Cdk1	Ki67
control	17.7212	1.95448	1.02014
75% dieting	6.16808	0.0444013	0.0473593
SD
	0.746835	0.423675	0.111493
	1.06126	0.0417957	0.0380942
p	0.000103215	0.00147829	0.000138904

## Sheet: WB Fig
ctrl	Casp3	CDK1	Ki67
1	0.806445	0.598931	0.274487
2	0.888619	0.664419	0.34786
3	0.868827	0.649477	0.300519
mean	0.85463	0.637609	0.307622
SD	0.0428867	0.0343192	0.0371984
75% dieting	Casp3	CDK1	Ki67
1	0.639673	0.482045	0.241202
2	0.681743	0.537505	0.255688
3	0.693375	0.545688	0.217252
mean	0.671597	0.521746	0.238047
SD	0.0282523	0.0346245	0.0194111
mean	Casp3	CDK1	Ki67
control	0.85463	0.637609	0.307622
75% dieting	0.671597	0.521746	0.238047
SD
	0.0428867	0.0343192	0.0371984
	0.0282523	0.0346245	0.0194111
p	0.00349752	0.014655	0.0453746

## Sheet: WB
Ctrl	actin	Casp3	CDK1	Ki67
	107954	87059	64657	29632
	95366	84744	63363	33174
	93891	81575	60980	28216
mean	99070.3	84459.3	63000	30340.7
SD	7728.75	2753.06	1865.18	2553.84
75% Diet	actin	Casp3	CDK1	Ki67
1	103370	66123	49829	24933
2	91467	62357	49164	23387
3	87387	60592	47686	18985
mean	94074.7	63024	48893	22435
SD	8304.46	2825.18	1096.9	3086.16
ctrl
relative	actin	Casp3	CDK1	Ki67
	1	0.806445	0.598931	0.274487
	1	0.888619	0.664419	0.34786
	1	0.868827	0.649477	0.300519
mean	1	0.847532	0.631675	0.311174
SD	0	0.0581053	0.0463071	0.0518822
0.75
	actin	Casp3	CDK1	Ki67
		0.639673	0.482045	0.241202
		0.681743	0.537505	0.255688
		0.693375	0.545688	0.217252
mean	#DIV/0!	0.671597	0.521746	0.238047
SD	#DIV/0!	0.0282523	0.0346245	0.0194111
P		0.00349752	0.014655	0.0453746
