# Supplementary material for: Dieting alleviates hyperuricemia and organ injuries in uricase-deficient rats via down-regulating cell cycle pathway
Source: PeerJ. 2023 Sep 8;11:e15999. doi: 10.7717/peerj.15999 (PMC10494837; doi:10.7717/peerj.15999)
Supplement: Supplemental Information 35 [file peerj-11-15999-s035.xlsx]

## Sheet: raw
Gene ID	Gene Name	Pos.	FPKM (E1)	FPKM (E2)	FPKM (E3)	FPKM (Li2)	FPKM (Li3)	FPKM (Li4)	GeneName	GeneDescription	GO	KEGG	KOG
ENSRNOG00000004101	2023-03-01	13[-]102698546-102721218	139.37	191.232	208.93	112.869	107.133	115.823	2023-03-01	mitochondrial amidoxime reducing component 1 [Source:RGD Symbol;Acc:1592219]	GO:0003824;GO:0016021;GO:0016020;GO:0030170;GO:0030151;GO:0008940;GO:0043546;GO:0042126;GO:0055114;GO:0005739;GO:0005743	-	KOG2362-Uncharacterized Fe-S protein[R]
ENSRNOG00000026310	2023-03-01	16[-]25001666-25192675	0.237037	0.124453	0	0.090228	0.1513	0.367825	2023-03-01	membrane associated ring-CH-type finger 1 [Source:RGD Symbol;Acc:1305148]	GO:0008270;GO:0046872;GO:0016021;GO:0016020;GO:0004842;GO:0042287;GO:0061630;GO:0000209;GO:0002495;GO:0006955;GO:0005764;GO:0005765;GO:0005768;GO:0005789;GO:0005886;GO:0031901;GO:0031902;GO:0032588	-	KOG1609-Protein involved in mRNA turnover and stability[A]
ENSRNOG00000007769	2023-03-02	7[-]18559205-18585313	75.0271	69.2662	83.7953	71.946	71.7459	71.7075	2023-03-02	membrane associated ring-CH-type finger 2 [Source:RGD Symbol;Acc:1306395]	GO:0005789;GO:0005783;GO:0016567;GO:0008270;GO:0046872;GO:0016740;GO:0016021;GO:0016020;GO:0031410;GO:0005768;GO:0004842;GO:0005764;GO:0005765;GO:0010008;GO:0006897	-	KOG1609-Protein involved in mRNA turnover and stability[A]
ENSRNOG00000037850	2023-03-02	13[-]102724348-102756174	178.781	179.468	194.937	44.6579	42.4221	46.0856	2023-03-02	mitochondrial amidoxime reducing component 2 [Source:RGD Symbol;Acc:621257]	GO:0003824;GO:0016021;GO:0016020;GO:0030170;GO:0030151	-	KOG2362-Uncharacterized Fe-S protein[R]
ENSRNOG00000023013	2023-03-03	18[-]51844976-52017734	1.07132	0.895069	1.13933	1.75052	1.84237	1.19066	2023-03-03	membrane associated ring-CH-type finger 3 [Source:RGD Symbol;Acc:1359308]	GO:0016567;GO:0008270;GO:0046872;GO:0016740;GO:0016021;GO:0016020;GO:0030659;GO:0031410;GO:0031901;GO:0005768;GO:0005764;GO:0006897	-	KOG1609-Protein involved in mRNA turnover and stability[A]
ENSRNOG00000016472	2023-03-04	9[-]79782845-79898912	0	0	0	0	0	0	2023-03-04	membrane associated ring-CH-type finger 4 [Source:RGD Symbol;Acc:1590797]	GO:0016567;GO:0008270;GO:0046872;GO:0016021;GO:0016020;GO:0004842;GO:0005795;GO:0005802	-	KOG1609-Protein involved in mRNA turnover and stability[A]
ENSRNOG00000017396	2023-03-05	1[+]255842783-255863142	18.1922	16.3311	15.1266	31.43	28.2792	28.2693	2023-03-05	membrane associated ring-CH-type finger 5 [Source:RGD Symbol;Acc:1305617]	GO:0008270;GO:0046872;GO:0016021;GO:0016020;GO:0004842;GO:0051020;GO:0000209;GO:0051865;GO:0070585;GO:0090140;GO:0090141;GO:0090344;GO:0005739;GO:0005741;GO:0005783;GO:0005789	-	KOG3053-Uncharacterized conserved protein[S]
ENSRNOG00000011066	2023-03-06	2[-]84536669-84608712	11.8692	15.8522	14.0464	11.474	8.31225	16.6022	2023-03-06	membrane associated ring-CH-type finger 6 [Source:RGD Symbol;Acc:1565757]	GO:0008270;GO:0046872;GO:0016021;GO:0016020;GO:0030176;GO:1904264;GO:0030433;GO:0004842;GO:0019899;GO:0031624;GO:1990381;GO:0010498;GO:0070936;GO:0005783	K10661-ko04141 Protein processing in endoplasmic reticulum	KOG1609-Protein involved in mRNA turnover and stability[A]
ENSRNOG00000006241	2023-03-07	3[+]46286712-46324057	1.64841	1.2153	1.0814	7.51925	6.04056	7.3641	2023-03-07	membrane associated ring-CH-type finger 7 [Source:RGD Symbol;Acc:1308993]	GO:0016567;GO:0008270;GO:0046872;GO:0016740;GO:0002643;GO:0042130	-	KOG1609-Protein involved in mRNA turnover and stability[A]
ENSRNOG00000012297	2023-03-08	4[+]148286853-148398148	13.0146	14.7681	14.6334	19.7726	17.3657	19.5435	2023-03-08	membrane associated ring-CH-type finger 8 [Source:RGD Symbol;Acc:1309339]	GO:0008270;GO:0046872;GO:0016021;GO:0016020;GO:0004842;GO:0042289;GO:0061630;GO:0002495;GO:0016567;GO:0045347	-	KOG1609-Protein involved in mRNA turnover and stability[A]
ENSRNOG00000046245	2023-03-09	7[-]70343527-70348780	0.299926	0.151069	0.389167	0.413228	0.647875	0.30847	2023-03-09	membrane associated ring-CH-type finger 9 [Source:RGD Symbol;Acc:1590688]	GO:0008270;GO:0046872;GO:0016021;GO:0016020;GO:0005795;GO:0005802	-	KOG1609-Protein involved in mRNA turnover and stability[A]
ENSRNOG00000007084	2023-03-10	10[-]93591188-93679974	0	0	0	0	0	0	2023-03-10	membrane associated ring-CH-type finger 10 [Source:RGD Symbol;Acc:1311692]	GO:0016874;GO:0016567;GO:0008270;GO:0046872;GO:0016740	-	KOG1609-Protein involved in mRNA turnover and stability[A]
ENSRNOG00000024461	2023-03-11	2[+]78825074-78926395	0	0	0	0	0	0	2023-03-11	membrane associated ring-CH-type finger 11 [Source:RGD Symbol;Acc:1559945]	GO:0008270;GO:0046872;GO:0016021;GO:0016020	-	KOG1609-Protein involved in mRNA turnover and stability[A]
ENSRNOG00000017804	2023-09-01	1[-]198658745-198662610	1.36428	1.50704	0.766414	0.748581	0.955747	0.867619	2023-09-01	septin 1 [Source:RGD Symbol;Acc:1307216]	GO:0005856;GO:0005525;GO:0000166;GO:0005737;GO:0051301;GO:0007049;GO:0005815;GO:0030496;GO:0007056;GO:0051311;GO:0072687	K13737-ko05100 Bacterial invasion of epithelial cells	KOG2655-Septin family protein (P-loop GTPase)[DZU]
ENSRNOG00000017952	2023-09-02	9[+]100624876-100658050	10.1386	8.19676	6.87517	25.7517	25.0719	25.0485	2023-09-02	septin 2 [Source:RGD Symbol;Acc:620056]	GO:0005856;GO:0005525;GO:0005886;GO:0000166;GO:0005737;GO:0016020;GO:0051301;GO:0048471;GO:0007049;GO:0005819;GO:0031175;GO:0042995;GO:0030154;GO:0030496;GO:0007283;GO:0060271;GO:0005938;GO:0003924;GO:0000145;GO:0007224;GO:0032154;GO:0060170;GO:0045296;GO:0005634;GO:0005730;GO:0005829;GO:0005930;GO:0015629;GO:0031105;GO:0032391;GO:0070062;GO:0097227;GO:0097730	K16942-ko05100 Bacterial invasion of epithelial cells	KOG2655-Septin family protein (P-loop GTPase)[DZU]
ENSRNOG00000007686	2023-09-03	7[+]123510804-123526542	0	0.083444	0.236834	0.101831	0	0.161375	2023-09-03	septin 3 [Source:RGD Symbol;Acc:621745]	GO:0005525;GO:0000166;GO:0007049;GO:0042802	K16938-ko05100 Bacterial invasion of epithelial cells	KOG1547-Septin CDC10 and related P-loop GTPases[DTZ]
ENSRNOG00000007367	2023-09-04	10[+]74861714-74884196	4.66848	3.17313	4.57926	7.31757	7.13512	7.06582	2023-09-04	septin 4 [Source:RGD Symbol;Acc:1308781]	GO:0005525;GO:0000166;GO:0051260;GO:0042803;GO:0003924;GO:0000287;GO:0007286;GO:0007420;GO:0030382;GO:0031398;GO:0043065;GO:0048240;GO:2001244;GO:0005654;GO:0005739;GO:0031105;GO:0031514;GO:0036126;GO:0042995;GO:0043209;GO:0097227	K16943-ko04210 Apoptosis;ko04215 Apoptosis - multiple species	KOG2655-Septin family protein (P-loop GTPase)[DZU]
ENSRNOG00000043182	2023-09-06	X[-]123524950-123662350	0.443768	0.277023	0.338706	0.698582	0.965613	0.905514	2023-09-06	septin 6 [Source:RGD Symbol;Acc:1585082]	GO:0005525;GO:0000166;GO:0005940;GO:0008021;GO:0031105;GO:0032154;GO:0032173;GO:0043679;GO:0097227	K16939-ko05100 Bacterial invasion of epithelial cells	KOG2655-Septin family protein (P-loop GTPase)[DZU]
ENSRNOG00000006545	2023-09-07	8[+]26413233-26476611	3.26845	2.61077	2.79566	10.3829	11.4371	9.65655	2023-09-07	septin 7 [Source:RGD Symbol;Acc:620469]	GO:0005525;GO:0000166;GO:0031105	-	KOG2655-Septin family protein (P-loop GTPase)[DZU]
ENSRNOG00000007462	2023-09-08	10[+]38877422-38906482	1.04899	0.919799	0.692426	1.15503	1.14005	1.43388	2023-09-08	septin 8 [Source:RGD Symbol;Acc:1308449]	GO:0005525;GO:0000166	K16939-ko05100 Bacterial invasion of epithelial cells	KOG2655-Septin family protein (P-loop GTPase)[DZU]
ENSRNOG00000002807	2023-09-09	10[+]106264434-106348490	23.4953	23.6269	20.3528	20.3561	15.4517	24.0008	2023-09-09	septin 9 [Source:RGD Symbol;Acc:708523]	GO:0005525;GO:0000166;GO:0045296;GO:0051291;GO:1902857;GO:0001725;GO:0005874;GO:0005930;GO:0015629;GO:0031105;GO:0048471;GO:0097730	K16938-ko05100 Bacterial invasion of epithelial cells	KOG1547-Septin CDC10 and related P-loop GTPases[DTZ]
ENSRNOG00000049507	2023-09-10	20[-]28722580-28814636	1.0771	0.807543	0.682869	5.28764	4.60928	4.98526	2023-09-10	septin 10 [Source:RGD Symbol;Acc:1359307]	GO:0005525;GO:0000166	-	-
ENSRNOG00000002182	2023-09-11	14[-]16369544-16452998	4.48365	3.65554	3.77888	4.64208	4.96472	6.00026	2023-09-11	septin 11 [Source:RGD Symbol;Acc:1307405]	GO:0045202;GO:0030054;GO:0005856;GO:0005525;GO:0000166;GO:0005737;GO:0051301;GO:0007049;GO:0042995;GO:0030424;GO:0051291;GO:0001725;GO:0043197;GO:0070062	K16939-ko05100 Bacterial invasion of epithelial cells	KOG2655-Septin family protein (P-loop GTPase)[DZU]
ENSRNOG00000003137	2023-09-12	10[+]10774639-10784277	0.011677	0	0	0	0	0.018197	2023-09-12	septin 12 [Source:RGD Symbol;Acc:1565511]	GO:0042803;GO:0005515;GO:0005856;GO:0005525;GO:0000166;GO:0005737;GO:0051301;GO:0007049;GO:0005819;GO:0042995;GO:0030154;GO:0030496;GO:0048471;GO:0005929;GO:0031514;GO:0007283;GO:0042802;GO:0097722;GO:0015630;GO:0031105;GO:0097227	K16938-ko05100 Bacterial invasion of epithelial cells	KOG1547-Septin CDC10 and related P-loop GTPases[DTZ]
ENSRNOG00000038495	2023-09-14	12[+]30600957-30621079	0	0	0	0	0	0	2023-09-14	septin 14 [Source:RGD Symbol;Acc:1596186]	GO:0005525;GO:0000166	-	KOG2655-Septin family protein (P-loop GTPase)[DZU]
ENSRNOG00000055257	2023-09-15	2[+]250600823-250633897	62.0291	58.8025	57.5288	107.149	113.693	94.9697	2023-09-15	selenoprotein 15 [Source:RGD Symbol;Acc:621291]	-	-	-
ENSRNOG00000040024	-	17[-]86870404-86873003	0	0	0	1.37319	2.30604	0.514117	-	-	GO:0005622;GO:0003676;GO:0006355	-	KOG1721-FOG: Zn-finger[R]
ENSRNOG00000057080	-	10[-]109891383-109891879	2.28229	1.51137	2.15725	0.636396	1.52866	0.709208	-	-	GO:0006281;GO:0003690;GO:0000712;GO:0031297;GO:0051382;GO:0043240;GO:0071821	K15360-ko03460 Fanconi anemia pathway	-
ENSRNOG00000024617	-	4[+]78263866-78265056	0.018836	0	0	0	0.164768	0.137738	-	-	GO:0003676	-	KOG1721-FOG: Zn-finger[R]
ENSRNOG00000060184	-	6[-]141957036-141957537	0.406215	0	0	0	0	0	-	-	GO:0003823;GO:0034987;GO:0006910;GO:0006911;GO:0006958;GO:0042742;GO:0045087;GO:0050853;GO:0050871;GO:0009897;GO:0042571;GO:0072562	-	-
ENSRNOG00000027296	-	18[+]30856847-30859261	0.079206	0.066403	0.079239	0.041489	0.08002	0.03868	-	-	GO:0007155;GO:0005886;GO:0005509;GO:0016020;GO:0016021;GO:0007267;GO:0005887;GO:0007156;GO:0007399	-	KOG3594-FOG: Cadherin repeats[S]
ENSRNOG00000030152	-	2[-]106702799-106703401	0.06254	0.033317	0.033634	0.010967	0.09783	0.090258	-	-	GO:0003735;GO:0003723;GO:0005840;GO:0006412;GO:0002181;GO:0022625;GO:0019843;GO:0005634;GO:0005925;GO:0016020;GO:0031012	K02940-ko03010 Ribosome	-
ENSRNOG00000056537	-	13[+]95983809-96101664	0	0	0	0.01819	0.051085	0.054056	-	-	GO:0016021;GO:0016020;GO:0036128	-	-
ENSRNOG00000051069	-	5[+]74727494-74954576	0.348786	0.405809	0.592709	1.49977	0.786622	2.63286	-	-	GO:0008360;GO:0016020;GO:0005575;GO:0008150;GO:0003674	-	-
ENSRNOG00000051063	-	20[+]27352276-27352684	0.234434	0.033715	0.397677	0.095091	0.315848	0.478539	-	-	GO:0070449;GO:0042787;GO:0032968;GO:0006511;GO:0004842	K03872-ko04120 Ubiquitin mediated proteolysis;ko04066 HIF-1 signaling pathway;ko05200 Pathways in cancer;ko05211 Renal cell carcinoma	KOG3473-RNA polymerase II transcription elongation factor Elongin/SIII, subunit elongin C[K]
ENSRNOG00000046460	-	13[-]109655300-109663364	0.899117	0.890992	0.630775	1.73966	1.85224	1.44777	-	-	GO:0016788	-	KOG3020-TatD-related DNase[L]
ENSRNOG00000030174	-	19[+]14345993-14346891	27.6757	28.1929	26.7694	32.7425	34.7127	30.367	-	-	GO:0070062;GO:0022627;GO:0016020;GO:0005925;GO:0005654;GO:0005634;GO:0051347;GO:0045296;GO:0019899;GO:0017134;GO:0003735;GO:0003729;GO:0003723;GO:0005840;GO:0006412;GO:0030529;GO:0015935	-	KOG0877-40S ribosomal protein S2/30S ribosomal protein S5[J]
ENSRNOG00000059093	-	2[+]198418691-198424443	0.875556	0.677604	0.494145	0.551697	0.121158	0.623388	-	-	GO:0000786;GO:0005694;GO:0046982;GO:0003677;GO:0005634;GO:0006334	-	-
ENSRNOG00000056059	-	4[+]69384145-69388971	0.048452	0	0	0	0	0	-	-	-	K10785-ko04014 Ras signaling pathway;ko04015 Rap1 signaling pathway;ko04064 NF-kappa B signaling pathway;ko04020 Calcium signaling pathway;ko04514 Cell adhesion molecules (CAMs);ko04612 Antigen processing and presentation;ko04660 T cell receptor signaling pathway;ko04672 Intestinal immune network for IgA production;ko05202 Transcriptional misregulation in cancers;ko05310 Asthma;ko05322 Systemic l…	-
ENSRNOG00000052969	-	3[+]19495628-19495915	0.75206	0.218351	0.934541	0	0	0.62955	-	-	GO:0005615;GO:0006955;GO:0002377	-	-
ENSRNOG00000042264	-	18[+]30826260-30828641	0.034926	0	0	0.036782	0	0	-	-	GO:0007155;GO:0005886;GO:0005509;GO:0016020;GO:0016021;GO:0007267;GO:0005887;GO:0007156;GO:0007399	-	KOG3594-FOG: Cadherin repeats[S]
ENSRNOG00000059237	.	9[-]121946495-121972055	0	0	0	0	0	0	-	-	-	-	-
ENSRNOG00000046343	.	9[-]71835883-71852113	0	0	0	0	0	0	-	-	-	-	-
ENSRNOG00000031564	.	6[-]11859630-11860001	0	0	0	0	0	0	-	-	GO:0000786;GO:0005694;GO:0046982;GO:0003677;GO:0005634;GO:0000790;GO:0006342	-	KOG1757-Histone 2A[B]
ENSRNOG00000039332	.	13[-]55701049-55701414	0	0	0	0	0	0	-	-	GO:0070062;GO:0005829;GO:0005654;GO:0005634;GO:0033613	-	-
ENSRNOG00000059050	.	1[-]42967295-42971208	0	0	0	0	0	0	-	-	GO:0005882;GO:0005198;GO:0045095	-	-
ENSRNOG00000057295	.	6[+]128152343-128153063	0	0	0	0	0	0	-	-	-	-	-
ENSRNOG00000042804	.	4[-]142970009-142970245	0	0	0	0	0	0	-	-	GO:0045893;GO:0051301;GO:0019005;GO:0007049;GO:0042393;GO:0045737;GO:0000307;GO:0043130;GO:0019901;GO:0016538;GO:0061575;GO:0007346	-	KOG3484-Cyclin-dependent protein kinase CDC28, regulatory subunit CKS1, and related proteins[D]
ENSRNOG00000057390	.	10[+]70964396-71014423	0	0	0	0	0	0	-	-	GO:0030414;GO:0005576;GO:0010466	-	-
ENSRNOG00000050954	.	14[-]182678-194072	0	0	0	0	0	0	-	-	GO:0007186;GO:0004930;GO:0007165;GO:0004871;GO:0016021;GO:0005886;GO:0016020	-	KOG1056-Glutamate-gated metabotropic ion channel receptor subunit GRM2 and related subunits, G-protein coupled receptor superfamily[PT]
ENSRNOG00000058348	.	13[-]101663880-101667147	0	0	0	0	0	0	-	-	-	-	-
ENSRNOG00000055164	.	6[-]139972140-139973811	0	0	0	0	0	0	-	-	GO:0003823;GO:0034987;GO:0006910;GO:0006911;GO:0006958;GO:0042742;GO:0045087;GO:0050853;GO:0050871;GO:0009897;GO:0042571;GO:0072562	-	-
ENSRNOG00000052193	.	6[+]28557633-28557848	0	0	0	0	0	0.005631	-	-	GO:0006289;GO:0006355;GO:0000439	-	-
ENSRNOG00000056582	.	10[-]102215722-102227554	0	0	0	0	0	0	-	-	GO:0046872	K14404-ko03015 mRNA surveillance pathway;ko05164 Influenza A	-
ENSRNOG00000047655	.	3[+]18805220-18805718	0	0	0	0	0	0	-	-	GO:0005615;GO:0006955;GO:0002377	-	-
ENSRNOG00000061492	.	X[-]50184215-50184697	0	0	0	0	0	0	-	-	GO:0003735;GO:0005840;GO:0006412;GO:0005622;GO:0022625	-	-
ENSRNOG00000055238	.	15[-]29547915-29548400	0	0	0	0	0	0	-	-	-	-	-
ENSRNOG00000026594	.	5[-]126086876-126096068	0	0	0	0	0	0	-	-	GO:0016021;GO:0016020	-	-
ENSRNOG00000050209	1190003K10Rik	17[-]1994172-1999596	0	0	0	0	0	0	1190003K10Rik	RIKEN cDNA 1190003K10 gene [Source:MGI Symbol;Acc:MGI:1916130]	-	-	-
ENSRNOG00000046163	1700007B14Rik	19[+]14835822-14987164	0	0	0	0	0	0	1700007B14Rik	RIKEN cDNA 1700007B14 gene [Source:MGI Symbol;Acc:MGI:1919081]	-	-	-
ENSRNOG00000053136	1700016D06Rik	16[+]83161880-83187148	0	0	0	0	0.044304	0	1700016D06Rik	RIKEN cDNA 1700016D06 gene [Source:MGI Symbol;Acc:MGI:1923663]	GO:0001669	-	-
ENSRNOG00000059251	1700020N01Rik	1[-]24571240-24604400	0	0	0	0	0	0	1700020N01Rik	RIKEN cDNA 1700020N01 gene [Source:MGI Symbol;Acc:MGI:1914942]	GO:0005622;GO:0003676;GO:0006355	-	-
ENSRNOG00000061597	1700025F22Rik	1[-]227331649-227359809	0	0	0	0	0	0	1700025F22Rik	RIKEN cDNA 1700025F22 gene [Source:MGI Symbol;Acc:MGI:1916666]	GO:0016021;GO:0016020	-	-
ENSRNOG00000039592	1700066B19Rik	18[+]28522841-28527253	0	0	0	0	0	0	1700066B19Rik	RIKEN cDNA 1700066B19 gene [Source:MGI Symbol;Acc:MGI:1920699]	GO:0016021;GO:0016020	-	-
ENSRNOG00000058142	1700069L16Rik	12[+]48677905-48702628	0	0	0	0	0	0	1700069L16Rik	RIKEN cDNA 1700069L16 gene [Source:MGI Symbol;Acc:MGI:1920726]	-	-	-
ENSRNOG00000048966	1700092M07Rik	1[+]224938801-224939171	0.282492	0	0.087957	0.273736	0	0.168534	1700092M07Rik	RIKEN cDNA 1700092M07 gene [Source:MGI Symbol;Acc:MGI:1921557]	-	-	-
ENSRNOG00000023430	2310003L06Rik	14[-]21756445-21761317	0	0	0	0	0	0	2310003L06Rik	RIKEN cDNA 2310003L06 gene [Source:MGI Symbol;Acc:MGI:1921498]	-	-	-
ENSRNOG00000061971	2812a1a2	20[-]3018323-3019709	0	0	0	0.019175	0.031419	0	2812a1a2	class I gene fragment 2812 [Source:RGD Symbol;Acc:1595777]	-	-	-
ENSRNOG00000052365	3082ex4-5	20[+]2493695-2494007	0.528713	0.194454	0.595753	0.720252	0.786169	1.57459	3082ex4-5	RT1 class pseudogene 3082ex4-5 [Source:RGD Symbol;Acc:1597082]	-	-	-
ENSRNOG00000058812	3100002H09Rik	5[-]142590588-142592307	0	0	0	0	0	0	3100002H09Rik	RIKEN cDNA 3100002H09 gene [Source:MGI Symbol;Acc:MGI:1917499]	GO:0016021;GO:0016020	-	-
ENSRNOG00000046262	3110082J24Rik	6[+]27643009-27643305	0	0	0	0	0	0	3110082J24Rik	RIKEN cDNA 3110082J24 gene [Source:MGI Symbol;Acc:MGI:3641994]	-	-	-
ENSRNOG00000056415	3281a3	20[-]2297142-2297250	0	0	0	0	0	0	3281a3	RT1 class I, pseudogene 3281a3 [Source:RGD Symbol;Acc:1597072]	-	-	-
ENSRNOG00000057560	3298a3	20[+]2279882-2280206	0	0	0	0	0	0	3298a3	RT1 class I, pseudogene 3298a3 [Source:RGD Symbol;Acc:1597070]	-	-	-
ENSRNOG00000026152	4930513O06Rik	X[+]110233170-110249631	0	0	0	0	0	0.062939	4930513O06Rik	RIKEN cDNA 4930513O06 gene [Source:MGI Symbol;Acc:MGI:1922375]	-	-	-
ENSRNOG00000039624	4930596D02Rik	16[+]12955826-12957777	0	0	0	0	0	0	4930596D02Rik	RIKEN cDNA 4930596D02 gene [Source:MGI Symbol;Acc:MGI:3588288]	GO:0005085;GO:0007264;GO:0005622;GO:0043547	-	KOG3629-Guanine-nucleotide releasing factor[T]
ENSRNOG00000026227	4931400O07Rik	X[+]145558840-145559422	0	0	0	0	0	0	4931400O07Rik	RIKEN cDNA 4931400O07 gene [Source:MGI Symbol;Acc:MGI:1918186]	-	-	-
ENSRNOG00000022632	4933416C03Rik	7[-]59138768-59139910	0	0	0	0	0	0	4933416C03Rik	RIKEN cDNA 4933416C03 gene [Source:MGI Symbol;Acc:MGI:3588269]	GO:0044212;GO:0006357;GO:0003713;GO:0051123;GO:0005669;GO:0008134;GO:0035035;GO:0006367	K03132-ko03022 Basal transcription factors	KOG4011-Transcription initiation factor TFIID, subunit TAF7[K]
ENSRNOG00000037368	4933427I04Rik	5[+]141530211-141530903	0	0	0	0	0	0	4933427I04Rik	Riken cDNA 4933427I04 gene [Source:MGI Symbol;Acc:MGI:3613760]	-	-	-
ENSRNOG00000055533	4933428G20Rik	10[-]85433236-85435016	0	0	0	0	0	0.094551	4933428G20Rik	RIKEN cDNA 4933428G20 gene [Source:MGI Symbol;Acc:MGI:1918475]	-	-	-
ENSRNOG00000051726	4933436I01Rik	X[+]155416653-155418844	0	0	0	0	0	0	4933436I01Rik	RIKEN cDNA 4933436I01 gene [Source:MGI Symbol;Acc:MGI:1914030]	-	-	-
ENSRNOG00000055218	5_8S_rRNA	2[+]128826108-128826252	0	0	0.089272	0	0.07467	0.390336	5_8S_rRNA	5.8S ribosomal RNA [Source:RFAM;Acc:RF00002]	-	-	-
ENSRNOG00000056172	5_8S_rRNA	5[+]91134985-91135137	16.6202	14.9616	7.47878	0.307134	0.498039	0.407802	5_8S_rRNA	5.8S ribosomal RNA [Source:RFAM;Acc:RF00002]	-	-	-
ENSRNOG00000052601	5_8S_rRNA	2[+]161553282-161553434	0	0	0	0	0	0	5_8S_rRNA	5.8S ribosomal RNA [Source:RFAM;Acc:RF00002]	-	-	-
ENSRNOG00000052008	5_8S_rRNA	11[+]39194513-39194665	0	0	0	0	0	0	5_8S_rRNA	5.8S ribosomal RNA [Source:RFAM;Acc:RF00002]	-	-	-
ENSRNOG00000056784	5_8S_rRNA	9[-]7467280-7467432	0	0	0	0	0	0	5_8S_rRNA	5.8S ribosomal RNA [Source:RFAM;Acc:RF00002]	-	-	-
ENSRNOG00000053668	5_8S_rRNA	7[+]1625169-1625321	0	0	0	0	0	0	5_8S_rRNA	5.8S ribosomal RNA [Source:RFAM;Acc:RF00002]	-	-	-
ENSRNOG00000060947	5_8S_rRNA	2[+]161564612-161564764	0	0	0	0	0	0	5_8S_rRNA	5.8S ribosomal RNA [Source:RFAM;Acc:RF00002]	-	-	-
ENSRNOG00000056513	5_8S_rRNA	2[+]128817901-128818053	0	0	0	0	0	0	5_8S_rRNA	5.8S ribosomal RNA [Source:RFAM;Acc:RF00002]	-	-	-
ENSRNOG00000056234	5_8S_rRNA	5[+]123058824-123058975	0	0	0	0	0	0	5_8S_rRNA	5.8S ribosomal RNA [Source:RFAM;Acc:RF00002]	-	-	-
ENSRNOG00000054106	5_8S_rRNA	X[-]145875795-145875947	0	0	0.071738	0	0	0	5_8S_rRNA	5.8S ribosomal RNA [Source:RFAM;Acc:RF00002]	-	-	-
ENSRNOG00000053632	5_8S_rRNA	4[-]166663656-166663808	0.031897	0	0	0	0	0	5_8S_rRNA	5.8S ribosomal RNA [Source:RFAM;Acc:RF00002]	-	-	-
ENSRNOG00000059394	5_8S_rRNA	14[+]46686984-46687136	5.46404	6.41701	2.7444	0.240301	0.225377	0.178815	5_8S_rRNA	5.8S ribosomal RNA [Source:RFAM;Acc:RF00002]	-	-	-
ENSRNOG00000059722	5_8S_rRNA	2[-]409772-409924	0	0	0	0	0	0	5_8S_rRNA	5.8S ribosomal RNA [Source:RFAM;Acc:RF00002]	-	-	-
ENSRNOG00000055515	5_8S_rRNA	7[-]712846-712998	0.061716	0.05361	0	0	0	0	5_8S_rRNA	5.8S ribosomal RNA [Source:RFAM;Acc:RF00002]	-	-	-
ENSRNOG00000058725	5_8S_rRNA	5[+]91132967-91133119	7.03769	7.17126	3.24163	0.319322	0.174233	0.142989	5_8S_rRNA	5.8S ribosomal RNA [Source:RFAM;Acc:RF00002]	-	-	-
ENSRNOG00000053209	5_8S_rRNA	20[-]56179218-56179362	0	0	0	0	0	0	5_8S_rRNA	5.8S ribosomal RNA [Source:RFAM;Acc:RF00002]	-	-	-
ENSRNOG00000056663	5_8S_rRNA	18[-]46914079-46914226	0	0	0	0	0	0	5_8S_rRNA	5.8S ribosomal RNA [Source:RFAM;Acc:RF00002]	-	-	-
ENSRNOG00000059018	5_8S_rRNA	7[+]18452-18604	0	0	0	0	0	0	5_8S_rRNA	5.8S ribosomal RNA [Source:RFAM;Acc:RF00002]	-	-	-
ENSRNOG00000051831	5_8S_rRNA	1[-]11906441-11906593	8.49098	6.82172	3.14068	0.058938	0.218515	0.298414	5_8S_rRNA	5.8S ribosomal RNA [Source:RFAM;Acc:RF00002]	-	-	-
ENSRNOG00000058979	5_8S_rRNA	7[-]711679-711812	0.004359	0.00621	0.071226	0.209363	0	0	5_8S_rRNA	5.8S ribosomal RNA [Source:RFAM;Acc:RF00002]	-	-	-
ENSRNOG00000054754	5_8S_rRNA	8[+]126890674-126890825	0	0	0	0	0	0	5_8S_rRNA	5.8S ribosomal RNA [Source:RFAM;Acc:RF00002]	-	-	-
ENSRNOG00000054958	5_8S_rRNA	8[+]126883554-126883705	0	0	0	0	0	0	5_8S_rRNA	5.8S ribosomal RNA [Source:RFAM;Acc:RF00002]	-	-	-
ENSRNOG00000054851	5_8S_rRNA	2[+]197209883-197210035	0	0	0	0	0	0	5_8S_rRNA	5.8S ribosomal RNA [Source:RFAM;Acc:RF00002]	-	-	-
ENSRNOG00000051635	5_8S_rRNA	7[-]22453865-22454017	0.047167	0	0	0	0	0	5_8S_rRNA	5.8S ribosomal RNA [Source:RFAM;Acc:RF00002]	-	-	-
ENSRNOG00000058080	5_8S_rRNA	7[-]2221800-2221953	0	0	0	0	0	0	5_8S_rRNA	5.8S ribosomal RNA [Source:RFAM;Acc:RF00002]	-	-	-
ENSRNOG00000056796	5_8S_rRNA	7[+]99482875-99483028	0	0	0	0	0	0	5_8S_rRNA	5.8S ribosomal RNA [Source:RFAM;Acc:RF00002]	-	-	-
ENSRNOG00000053888	5_8S_rRNA	1[+]11970092-11970244	11.2705	8.83495	5.02269	0.098885	0.393928	0.321945	5_8S_rRNA	5.8S ribosomal RNA [Source:RFAM;Acc:RF00002]	-	-	-
ENSRNOG00000061306	5_8S_rRNA	2[+]550644-550797	0.264736	0.287572	0.647342	0.316634	0	0.278012	5_8S_rRNA	5.8S ribosomal RNA [Source:RFAM;Acc:RF00002]	-	-	-
ENSRNOG00000060300	5_8S_rRNA	4[-]166666646-166666798	0	0	0	0	0	0	5_8S_rRNA	5.8S ribosomal RNA [Source:RFAM;Acc:RF00002]	-	-	-
ENSRNOG00000058896	5_8S_rRNA	6[+]30630902-30631054	0.907697	0.784421	0.327031	0.083496	0.016619	0.054588	5_8S_rRNA	5.8S ribosomal RNA [Source:RFAM;Acc:RF00002]	-	-	-
ENSRNOG00000058530	5_8S_rRNA	8[+]126876673-126876824	0	0	0	0	0	0	5_8S_rRNA	5.8S ribosomal RNA [Source:RFAM;Acc:RF00002]	-	-	-
ENSRNOG00000059668	5_8S_rRNA	12[-]346962-347106	0	0	0.089272	0	0.07467	0.390336	5_8S_rRNA	5.8S ribosomal RNA [Source:RFAM;Acc:RF00002]	-	-	-
ENSRNOG00000059464	5_8S_rRNA	2[+]161559586-161559738	0	0	0	0	0	0	5_8S_rRNA	5.8S ribosomal RNA [Source:RFAM;Acc:RF00002]	-	-	-
ENSRNOG00000035686	5S_rRNA	1[+]71911840-71911956	0	0	0	0	0	0	5S_rRNA	5S ribosomal RNA [Source:RFAM;Acc:RF00001]	-	-	-
ENSRNOG00000044409	5S_rRNA	X[+]40233280-40233412	0	0	0	0	0	0	5S_rRNA	5S ribosomal RNA [Source:RFAM;Acc:RF00001]	-	-	-
ENSRNOG00000057146	5S_rRNA	X[+]22375180-22375302	0	0	0	0	0.266744	0.032962	5S_rRNA	5S ribosomal RNA [Source:RFAM;Acc:RF00001]	-	-	-
ENSRNOG00000044610	5S_rRNA	13[-]51976773-51976852	0	0	0.238606	0.254662	0.721808	0.354755	5S_rRNA	5S ribosomal RNA [Source:RFAM;Acc:RF00001]	-	-	-
ENSRNOG00000035437	5S_rRNA	6[-]72181427-72181547	0	0	0	0.300861	0	0	5S_rRNA	5S ribosomal RNA [Source:RFAM;Acc:RF00001]	-	-	-
ENSRNOG00000036163	5S_rRNA	12[+]9651829-9651948	0	0	0	0	0	0	5S_rRNA	5S ribosomal RNA [Source:RFAM;Acc:RF00001]	-	-	-
ENSRNOG00000044338	5S_rRNA	7[-]32471290-32471411	0	0	0	0	0	0	5S_rRNA	5S ribosomal RNA [Source:RFAM;Acc:RF00001]	-	-	-
ENSRNOG00000048483	5S_rRNA	1[-]262963569-262963688	0	0	0	0	0	0	5S_rRNA	5S ribosomal RNA [Source:RFAM;Acc:RF00001]	-	-	-
ENSRNOG00000049449	5S_rRNA	X[-]9541227-9541333	0	0	0	0	0	0	5S_rRNA	5S ribosomal RNA [Source:RFAM;Acc:RF00001]	-	-	-
ENSRNOG00000035103	5S_rRNA	12[-]42025661-42025779	0.479801	0.041956	0.247629	0	0.103391	0	5S_rRNA	5S ribosomal RNA [Source:RFAM;Acc:RF00001]	-	-	-
ENSRNOG00000036453	5S_rRNA	4[+]153099268-153099386	0	0	0	0	0	0	5S_rRNA	5S ribosomal RNA [Source:RFAM;Acc:RF00001]	-	-	-
ENSRNOG00000044699	5S_rRNA	17[-]25470867-25470995	0	0	0	0	0	0	5S_rRNA	5S ribosomal RNA [Source:RFAM;Acc:RF00001]	-	-	-
ENSRNOG00000051651	5S_rRNA	8[+]109746280-109746380	0	0	0	0	0	0	5S_rRNA	5S ribosomal RNA [Source:RFAM;Acc:RF00001]	-	-	-
ENSRNOG00000044715	5S_rRNA	18[-]64976335-64976448	0	0	0	0	0	0	5S_rRNA	5S ribosomal RNA [Source:RFAM;Acc:RF00001]	-	-	-
ENSRNOG00000042007	5S_rRNA	17[+]12278481-12278592	0	0	0	0	0	0	5S_rRNA	5S ribosomal RNA [Source:RFAM;Acc:RF00001]	-	-	-
ENSRNOG00000045148	5S_rRNA	14[-]9278881-9278990	0	0	0	0	0	0	5S_rRNA	5S ribosomal RNA [Source:RFAM;Acc:RF00001]	-	-	-
ENSRNOG00000034920	5S_rRNA	3[+]66007447-66007559	0	0	0	0	0	0	5S_rRNA	5S ribosomal RNA [Source:RFAM;Acc:RF00001]	-	-	-
ENSRNOG00000040878	5S_rRNA	14[-]60192139-60192257	0	0	0	0	0	0	5S_rRNA	5S ribosomal RNA [Source:RFAM;Acc:RF00001]	-	-	-
ENSRNOG00000035238	5S_rRNA	X[+]106830663-106830781	0	0	0	0	0	0	5S_rRNA	5S ribosomal RNA [Source:RFAM;Acc:RF00001]	-	-	-
ENSRNOG00000041845	5S_rRNA	X[-]92069989-92070113	0	0	0	0	0	0	5S_rRNA	5S ribosomal RNA [Source:RFAM;Acc:RF00001]	-	-	-
ENSRNOG00000044566	5S_rRNA	1[+]255816888-255816993	0	0	0	0	0	0	5S_rRNA	5S ribosomal RNA [Source:RFAM;Acc:RF00001]	-	-	-
ENSRNOG00000041864	5S_rRNA	18[+]11640201-11640300	0	0	0	0	0	0	5S_rRNA	5S ribosomal RNA [Source:RFAM;Acc:RF00001]	-	-	-
ENSRNOG00000034772	5S_rRNA	19[-]42305895-42306012	1.327	0.500989	0.450521	0	0.042819	0.040681	5S_rRNA	5S ribosomal RNA [Source:RFAM;Acc:RF00001]	-	-	-
ENSRNOG00000041857	5S_rRNA	12[-]45113785-45113903	0	0	0	0	0	0	5S_rRNA	5S ribosomal RNA [Source:RFAM;Acc:RF00001]	-	-	-
ENSRNOG00000036071	5S_rRNA	7[-]29252548-29252666	0	0	0	0	0	0	5S_rRNA	5S ribosomal RNA [Source:RFAM;Acc:RF00001]	-	-	-
ENSRNOG00000048971	5S_rRNA	1[+]217417653-217417757	0	0	0	0	0	0	5S_rRNA	5S ribosomal RNA [Source:RFAM;Acc:RF00001]	-	-	-
ENSRNOG00000044850	5S_rRNA	5[-]28555407-28555516	0	0	0	0	0	0	5S_rRNA	5S ribosomal RNA [Source:RFAM;Acc:RF00001]	-	-	-
ENSRNOG00000054827	5S_rRNA	7[-]109924490-109924589	0	0	0	0	0	0	5S_rRNA	5S ribosomal RNA [Source:RFAM;Acc:RF00001]	-	-	-
ENSRNOG00000044087	5S_rRNA	3[+]55740486-55740597	0	0	0	0	0	0	5S_rRNA	5S ribosomal RNA [Source:RFAM;Acc:RF00001]	-	-	-
ENSRNOG00000044954	5S_rRNA	X[+]21674860-21674970	0	0	0	0	0	0	5S_rRNA	5S ribosomal RNA [Source:RFAM;Acc:RF00001]	-	-	-
ENSRNOG00000045182	5S_rRNA	X[-]80217815-80217920	0	0	0	0	0	0	5S_rRNA	5S ribosomal RNA [Source:RFAM;Acc:RF00001]	-	-	-
ENSRNOG00000057429	5S_rRNA	3[-]174960988-174961107	0	0	0	0	0	0	5S_rRNA	5S ribosomal RNA [Source:RFAM;Acc:RF00001]	-	-	-
ENSRNOG00000058198	5S_rRNA	6[-]43450502-43450620	0	0	0	0	0	0	5S_rRNA	5S ribosomal RNA [Source:RFAM;Acc:RF00001]	-	-	-
ENSRNOG00000044968	5S_rRNA	X[-]11124328-11124444	0	0	0	0	0	0	5S_rRNA	5S ribosomal RNA [Source:RFAM;Acc:RF00001]	-	-	-
ENSRNOG00000045387	5S_rRNA	20[-]7231312-7231421	0	0	0	0	0	0	5S_rRNA	5S ribosomal RNA [Source:RFAM;Acc:RF00001]	-	-	-
ENSRNOG00000035171	5S_rRNA	10[+]43188337-43188452	0	0	0	0	0	0	5S_rRNA	5S ribosomal RNA [Source:RFAM;Acc:RF00001]	-	-	-
ENSRNOG00000059941	5S_rRNA	17[-]47856706-47856841	0	0	0	0	0	0	5S_rRNA	5S ribosomal RNA [Source:RFAM;Acc:RF00001]	-	-	-
ENSRNOG00000035323	5S_rRNA	3[+]162114715-162114831	0	0	0	0	0	0	5S_rRNA	5S ribosomal RNA [Source:RFAM;Acc:RF00001]	-	-	-
ENSRNOG00000050589	5S_rRNA	12[-]1512805-1512922	0	0	0	0	0	0	5S_rRNA	5S ribosomal RNA [Source:RFAM;Acc:RF00001]	-	-	-
ENSRNOG00000034513	5S_rRNA	14[+]59994508-59994612	0	0	0	0	0	0	5S_rRNA	5S ribosomal RNA [Source:RFAM;Acc:RF00001]	-	-	-
ENSRNOG00000041913	5S_rRNA	14[+]75478534-75478648	0	0	0	0	0	0	5S_rRNA	5S ribosomal RNA [Source:RFAM;Acc:RF00001]	-	-	-
ENSRNOG00000052185	5S_rRNA	10[+]1137006-1137119	0	0	0	0	0	0	5S_rRNA	5S ribosomal RNA [Source:RFAM;Acc:RF00001]	-	-	-
ENSRNOG00000044555	5S_rRNA	15[-]43258072-43258174	0	0	0	0	0	0	5S_rRNA	5S ribosomal RNA [Source:RFAM;Acc:RF00001]	-	-	-
ENSRNOG00000041705	5S_rRNA	7[-]67028995-67029116	0	0	0	0	0	0	5S_rRNA	5S ribosomal RNA [Source:RFAM;Acc:RF00001]	-	-	-
ENSRNOG00000041708	5S_rRNA	7[+]77652740-77652853	0	0	0	0	0	0	5S_rRNA	5S ribosomal RNA [Source:RFAM;Acc:RF00001]	-	-	-
ENSRNOG00000043975	5S_rRNA	3[+]117069799-117069906	0	0	0	0	0	0	5S_rRNA	5S ribosomal RNA [Source:RFAM;Acc:RF00001]	-	-	-
ENSRNOG00000041999	5S_rRNA	1[-]141753477-141753577	0	0	0	0	0	0	5S_rRNA	5S ribosomal RNA [Source:RFAM;Acc:RF00001]	-	-	-
ENSRNOG00000041998	5S_rRNA	10[-]3399485-3399595	0	0	0	0	0	0	5S_rRNA	5S ribosomal RNA [Source:RFAM;Acc:RF00001]	-	-	-
ENSRNOG00000044330	5S_rRNA	9[+]96705077-96705194	0	0	0	0	0	0	5S_rRNA	5S ribosomal RNA [Source:RFAM;Acc:RF00001]	-	-	-
ENSRNOG00000044463	5S_rRNA	1[-]166886615-166886711	0	0	0	0	0	0	5S_rRNA	5S ribosomal RNA [Source:RFAM;Acc:RF00001]	-	-	-
ENSRNOG00000034350	5S_rRNA	7[+]128122479-128122590	0	0	0	0	0	0	5S_rRNA	5S ribosomal RNA [Source:RFAM;Acc:RF00001]	-	-	-
ENSRNOG00000049201	5S_rRNA	13[-]34620746-34620833	0	0	0	0	0	0	5S_rRNA	5S ribosomal RNA [Source:RFAM;Acc:RF00001]	-	-	-
ENSRNOG00000049202	5S_rRNA	7[-]115470612-115470700	0	0	0	0	0	0	5S_rRNA	5S ribosomal RNA [Source:RFAM;Acc:RF00001]	-	-	-
ENSRNOG00000055731	5S_rRNA	1[-]221848735-221848862	0	0	0	0	0	0	5S_rRNA	5S ribosomal RNA [Source:RFAM;Acc:RF00001]	-	-	-
ENSRNOG00000044867	5S_rRNA	10[+]73225479-73225582	0	0	0	0	0	0	5S_rRNA	5S ribosomal RNA [Source:RFAM;Acc:RF00001]	-	-	-
ENSRNOG00000044438	5S_rRNA	12[-]52217356-52217464	0	0	0	0	0	0	5S_rRNA	5S ribosomal RNA [Source:RFAM;Acc:RF00001]	-	-	-
ENSRNOG00000045014	5S_rRNA	9[+]67192615-67192711	0	0	0	0	0	0	5S_rRNA	5S ribosomal RNA [Source:RFAM;Acc:RF00001]	-	-	-
ENSRNOG00000041942	5S_rRNA	X[+]136888030-136888131	0	0	0	0	0	0	5S_rRNA	5S ribosomal RNA [Source:RFAM;Acc:RF00001]	-	-	-
ENSRNOG00000034781	5S_rRNA	X[+]83783944-83784047	0	0	0	0	0	0	5S_rRNA	5S ribosomal RNA [Source:RFAM;Acc:RF00001]	-	-	-
ENSRNOG00000034790	5S_rRNA	16[+]81470800-81470917	0	0	0	0	0	0	5S_rRNA	5S ribosomal RNA [Source:RFAM;Acc:RF00001]	-	-	-
ENSRNOG00000044214	5S_rRNA	18[-]16619115-16619197	0	0	0	0	0	0	5S_rRNA	5S ribosomal RNA [Source:RFAM;Acc:RF00001]	-	-	-
ENSRNOG00000048748	5S_rRNA	11[-]5746853-5746963	0	0	0	0	0	0	5S_rRNA	5S ribosomal RNA [Source:RFAM;Acc:RF00001]	-	-	-
ENSRNOG00000035046	5S_rRNA	1[-]226610410-226610527	0	0	0	0	0	0	5S_rRNA	5S ribosomal RNA [Source:RFAM;Acc:RF00001]	-	-	-
ENSRNOG00000044394	5S_rRNA	7[-]78039741-78039856	0.091471	0	0	0.774496	0.449716	0	5S_rRNA	5S ribosomal RNA [Source:RFAM;Acc:RF00001]	-	-	-
ENSRNOG00000056307	5S_rRNA	12[-]28114639-28114714	0	0	0	0	0	0	5S_rRNA	5S ribosomal RNA [Source:RFAM;Acc:RF00001]	-	-	-
ENSRNOG00000041892	5S_rRNA	4[-]120565918-120566023	0	0	0	0	0	0	5S_rRNA	5S ribosomal RNA [Source:RFAM;Acc:RF00001]	-	-	-
ENSRNOG00000041894	5S_rRNA	6[+]54541812-54541930	0	0	0	0.409761	0.117177	0	5S_rRNA	5S ribosomal RNA [Source:RFAM;Acc:RF00001]	-	-	-
ENSRNOG00000041897	5S_rRNA	8[-]15461564-15461681	0	0	0	0	0	0	5S_rRNA	5S ribosomal RNA [Source:RFAM;Acc:RF00001]	-	-	-
ENSRNOG00000044631	5S_rRNA	13[-]83992057-83992152	0	0	0	0	0	0	5S_rRNA	5S ribosomal RNA [Source:RFAM;Acc:RF00001]	-	-	-
ENSRNOG00000045211	5S_rRNA	5[+]115698762-115698879	0	0	0	0	0	0	5S_rRNA	5S ribosomal RNA [Source:RFAM;Acc:RF00001]	-	-	-
ENSRNOG00000043915	5S_rRNA	3[-]103957791-103957889	0	0	0.091586	0	0	0	5S_rRNA	5S ribosomal RNA [Source:RFAM;Acc:RF00001]	-	-	-
ENSRNOG00000036145	5S_rRNA	14[+]89011287-89011398	0.095259	0	0.036217	0	0	0	5S_rRNA	5S ribosomal RNA [Source:RFAM;Acc:RF00001]	-	-	-
ENSRNOG00000044905	5S_rRNA	3[+]110116737-110116844	0	0	0	0	0	0	5S_rRNA	5S ribosomal RNA [Source:RFAM;Acc:RF00001]	-	-	-
ENSRNOG00000050366	5S_rRNA	7[-]116076472-116076560	0	0	0	0	0	0	5S_rRNA	5S ribosomal RNA [Source:RFAM;Acc:RF00001]	-	-	-
ENSRNOG00000035357	5S_rRNA	7[+]47079888-47080006	0	0	0	0	0	0	5S_rRNA	5S ribosomal RNA [Source:RFAM;Acc:RF00001]	-	-	-
ENSRNOG00000047461	5S_rRNA	8[-]104436075-104436193	0	0	0	0	0	0.009085	5S_rRNA	5S ribosomal RNA [Source:RFAM;Acc:RF00001]	-	-	-
ENSRNOG00000050005	5S_rRNA	5[+]57678052-57678168	0	0	0	0	0	0	5S_rRNA	5S ribosomal RNA [Source:RFAM;Acc:RF00001]	-	-	-
ENSRNOG00000044170	5S_rRNA	14[-]59912941-59913047	0	0	0	0	0	0	5S_rRNA	5S ribosomal RNA [Source:RFAM;Acc:RF00001]	-	-	-
ENSRNOG00000041962	5S_rRNA	10[+]10420230-10420352	0	0	0	0	0	0	5S_rRNA	5S ribosomal RNA [Source:RFAM;Acc:RF00001]	-	-	-
ENSRNOG00000053776	5S_rRNA	19[-]1480467-1480584	0	0	0	0	0	0	5S_rRNA	5S ribosomal RNA [Source:RFAM;Acc:RF00001]	-	-	-
ENSRNOG00000045043	5S_rRNA	10[+]89437298-89437418	0	0	0	0	0	0	5S_rRNA	5S ribosomal RNA [Source:RFAM;Acc:RF00001]	-	-	-
ENSRNOG00000041777	5S_rRNA	5[-]99616158-99616282	0	0	0	0	0	0	5S_rRNA	5S ribosomal RNA [Source:RFAM;Acc:RF00001]	-	-	-
ENSRNOG00000041852	5S_rRNA	1[+]252987385-252987495	0	0	0	1.31036	0.515788	1.58521	5S_rRNA	5S ribosomal RNA [Source:RFAM;Acc:RF00001]	-	-	-
ENSRNOG00000044501	5S_rRNA	10[+]58847756-58847866	0	0	0	0	0	0	5S_rRNA	5S ribosomal RNA [Source:RFAM;Acc:RF00001]	-	-	-
ENSRNOG00000044505	5S_rRNA	14[+]34698439-34698551	0	0	0	0	0	0	5S_rRNA	5S ribosomal RNA [Source:RFAM;Acc:RF00001]	-	-	-
ENSRNOG00000044504	5S_rRNA	2[+]63047392-63047491	0	0	0	0	0	0	5S_rRNA	5S ribosomal RNA [Source:RFAM;Acc:RF00001]	-	-	-
ENSRNOG00000045298	5S_rRNA	5[-]131269813-131269924	0	0	0	0	0	0	5S_rRNA	5S ribosomal RNA [Source:RFAM;Acc:RF00001]	-	-	-
ENSRNOG00000045293	5S_rRNA	6[-]114013127-114013250	0	0	0	0	0	0	5S_rRNA	5S ribosomal RNA [Source:RFAM;Acc:RF00001]	-	-	-
ENSRNOG00000044773	5S_rRNA	1[+]191086154-191086261	0	0	0	0	0	0	5S_rRNA	5S ribosomal RNA [Source:RFAM;Acc:RF00001]	-	-	-
ENSRNOG00000044771	5S_rRNA	2[+]1413878-1413976	0	0	0	0	0.096109	0	5S_rRNA	5S ribosomal RNA [Source:RFAM;Acc:RF00001]	-	-	-
ENSRNOG00000034597	5S_rRNA	18[-]27673077-27673195	0	0	0	0	0	0	5S_rRNA	5S ribosomal RNA [Source:RFAM;Acc:RF00001]	-	-	-
ENSRNOG00000045168	5S_rRNA	8[-]87556226-87556331	0	0	0	0.329257	0	0	5S_rRNA	5S ribosomal RNA [Source:RFAM;Acc:RF00001]	-	-	-
ENSRNOG00000034366	5S_rRNA	14[+]59470573-59470677	0	0	0	0	0	0	5S_rRNA	5S ribosomal RNA [Source:RFAM;Acc:RF00001]	-	-	-
ENSRNOG00000041834	5S_rRNA	6[+]44933674-44933779	0	0	0	0	0	0	5S_rRNA	5S ribosomal RNA [Source:RFAM;Acc:RF00001]	-	-	-
ENSRNOG00000044838	5S_rRNA	10[-]27204832-27204958	0	0	0	0	0	0	5S_rRNA	5S ribosomal RNA [Source:RFAM;Acc:RF00001]	-	-	-
ENSRNOG00000044833	5S_rRNA	1[+]49487970-49487998	0.389381	0	0	0	0.328095	0	5S_rRNA	5S ribosomal RNA [Source:RFAM;Acc:RF00001]	-	-	-
ENSRNOG00000041847	5S_rRNA	16[-]39597895-39598013	0	0	0	0	0.017921	0	5S_rRNA	5S ribosomal RNA [Source:RFAM;Acc:RF00001]	-	-	-
ENSRNOG00000034753	5S_rRNA	3[-]51430540-51430661	0	0	0	0	0	0	5S_rRNA	5S ribosomal RNA [Source:RFAM;Acc:RF00001]	-	-	-
ENSRNOG00000044264	5S_rRNA	6[-]47309958-47310082	0	0	0	0	0	0	5S_rRNA	5S ribosomal RNA [Source:RFAM;Acc:RF00001]	-	-	-
ENSRNOG00000044267	5S_rRNA	4[+]8007758-8007855	0	0	0	0	0	0	5S_rRNA	5S ribosomal RNA [Source:RFAM;Acc:RF00001]	-	-	-
ENSRNOG00000047794	5S_rRNA	12[-]1503969-1504086	0	0	0	0	0	0	5S_rRNA	5S ribosomal RNA [Source:RFAM;Acc:RF00001]	-	-	-
ENSRNOG00000044437	5S_rRNA	20[+]55529383-55529513	0	0	0	0	0	0	5S_rRNA	5S ribosomal RNA [Source:RFAM;Acc:RF00001]	-	-	-
ENSRNOG00000034498	5S_rRNA	10[-]18117380-18117498	0	0	0	0	0	0	5S_rRNA	5S ribosomal RNA [Source:RFAM;Acc:RF00001]	-	-	-
ENSRNOG00000056449	5S_rRNA	16[+]90164093-90164214	0	0	0	0	0	0	5S_rRNA	5S ribosomal RNA [Source:RFAM;Acc:RF00001]	-	-	-
ENSRNOG00000044605	5S_rRNA	1[-]161836537-161836672	0	0	0	0	0	0	5S_rRNA	5S ribosomal RNA [Source:RFAM;Acc:RF00001]	-	-	-
ENSRNOG00000044082	5S_rRNA	2[+]48907237-48907356	0	0	0	0	0	0	5S_rRNA	5S ribosomal RNA [Source:RFAM;Acc:RF00001]	-	-	-
ENSRNOG00000044719	5S_rRNA	5[+]25704484-25704585	0	0	0	0	0	0	5S_rRNA	5S ribosomal RNA [Source:RFAM;Acc:RF00001]	-	-	-
ENSRNOG00000034354	5S_rRNA	11[+]55071181-55071299	0	0	0	0	0	0	5S_rRNA	5S ribosomal RNA [Source:RFAM;Acc:RF00001]	-	-	-
ENSRNOG00000036194	5S_rRNA	8[-]27933557-27933656	0	0	0	0	0	0	5S_rRNA	5S ribosomal RNA [Source:RFAM;Acc:RF00001]	-	-	-
ENSRNOG00000041652	5S_rRNA	X[+]63048909-63049030	0	0	0	0	0	0	5S_rRNA	5S ribosomal RNA [Source:RFAM;Acc:RF00001]	-	-	-
ENSRNOG00000041036	5S_rRNA	6[+]105867454-105867562	0	0	0	0	0	0	5S_rRNA	5S ribosomal RNA [Source:RFAM;Acc:RF00001]	-	-	-
ENSRNOG00000045369	5S_rRNA	1[+]29352780-29352913	0	0	0	0	0	0	5S_rRNA	5S ribosomal RNA [Source:RFAM;Acc:RF00001]	-	-	-
ENSRNOG00000045363	5S_rRNA	16[+]59859170-59859286	0	0	0	0	0	0	5S_rRNA	5S ribosomal RNA [Source:RFAM;Acc:RF00001]	-	-	-
ENSRNOG00000049889	5S_rRNA	8[-]104444240-104444358	0	0	0	0	0	0.027256	5S_rRNA	5S ribosomal RNA [Source:RFAM;Acc:RF00001]	-	-	-
ENSRNOG00000034413	5S_rRNA	11[+]41135373-41135490	0	0	0	0	0	0	5S_rRNA	5S ribosomal RNA [Source:RFAM;Acc:RF00001]	-	-	-
ENSRNOG00000041735	5S_rRNA	7[-]14118455-14118565	0	0	0	0	0	0	5S_rRNA	5S ribosomal RNA [Source:RFAM;Acc:RF00001]	-	-	-
ENSRNOG00000035114	5S_rRNA	12[+]24523049-24523164	0.180424	0	0	0	0	0	5S_rRNA	5S ribosomal RNA [Source:RFAM;Acc:RF00001]	-	-	-
ENSRNOG00000049159	5S_rRNA	1[-]262651376-262651495	0	0	0	0	0	0	5S_rRNA	5S ribosomal RNA [Source:RFAM;Acc:RF00001]	-	-	-
ENSRNOG00000041762	5S_rRNA	11[-]37986722-37986805	0	0	0	0	0	0	5S_rRNA	5S ribosomal RNA [Source:RFAM;Acc:RF00001]	-	-	-
ENSRNOG00000041764	5S_rRNA	5[+]76085176-76085270	0	0	0	0	0	0	5S_rRNA	5S ribosomal RNA [Source:RFAM;Acc:RF00001]	-	-	-
ENSRNOG00000046938	5S_rRNA	14[+]91220512-91220645	0	0	0	0	0	0	5S_rRNA	5S ribosomal RNA [Source:RFAM;Acc:RF00001]	-	-	-
ENSRNOG00000045798	5S_rRNA	16[-]5069246-5069346	0	0	0	0	0	0	5S_rRNA	5S ribosomal RNA [Source:RFAM;Acc:RF00001]	-	-	-
ENSRNOG00000045242	5S_rRNA	4[+]39094475-39094573	0	0	0	0	0	0	5S_rRNA	5S ribosomal RNA [Source:RFAM;Acc:RF00001]	-	-	-
ENSRNOG00000044645	5S_rRNA	2[-]253549325-253549451	0	0	0	0	0	0	5S_rRNA	5S ribosomal RNA [Source:RFAM;Acc:RF00001]	-	-	-
ENSRNOG00000040652	5S_rRNA	12[-]39942315-39942433	0	0	0	0	0	0	5S_rRNA	5S ribosomal RNA [Source:RFAM;Acc:RF00001]	-	-	-
ENSRNOG00000047614	5S_rRNA	X[-]10497411-10497517	0	0	0	0	0	0	5S_rRNA	5S ribosomal RNA [Source:RFAM;Acc:RF00001]	-	-	-
ENSRNOG00000054977	5S_rRNA	9[+]18736051-18736169	0	0	0	0	0	0	5S_rRNA	5S ribosomal RNA [Source:RFAM;Acc:RF00001]	-	-	-
ENSRNOG00000044415	5S_rRNA	3[+]96060091-96060208	0	0	0	0	0	0	5S_rRNA	5S ribosomal RNA [Source:RFAM;Acc:RF00001]	-	-	-
ENSRNOG00000044576	5S_rRNA	1[-]129014359-129014492	0	0	0	0	0	0	5S_rRNA	5S ribosomal RNA [Source:RFAM;Acc:RF00001]	-	-	-
ENSRNOG00000044036	5S_rRNA	4[-]101014197-101014310	0	0	0	0	0	0	5S_rRNA	5S ribosomal RNA [Source:RFAM;Acc:RF00001]	-	-	-
ENSRNOG00000035961	5S_rRNA	13[-]55895646-55895767	0	0	0	0	0	0	5S_rRNA	5S ribosomal RNA [Source:RFAM;Acc:RF00001]	-	-	-
ENSRNOG00000045463	5S_rRNA	10[-]76491532-76491641	0	0	0	0	0	0	5S_rRNA	5S ribosomal RNA [Source:RFAM;Acc:RF00001]	-	-	-
ENSRNOG00000036044	5S_rRNA	11[-]72575191-72575318	0	0.232178	0	0.041748	0	0	5S_rRNA	5S ribosomal RNA [Source:RFAM;Acc:RF00001]	-	-	-
ENSRNOG00000044448	5S_rRNA	11[+]58286601-58286737	0	0	0	0	0	0	5S_rRNA	5S ribosomal RNA [Source:RFAM;Acc:RF00001]	-	-	-
ENSRNOG00000041010	5S_rRNA	16[-]47464314-47464429	0	0	0	0	0	0	5S_rRNA	5S ribosomal RNA [Source:RFAM;Acc:RF00001]	-	-	-
ENSRNOG00000048684	5S_rRNA	16[-]13660684-13660756	0	0	0	0	0	0	5S_rRNA	5S ribosomal RNA [Source:RFAM;Acc:RF00001]	-	-	-
ENSRNOG00000046358	5S_rRNA	8[-]130370008-130370090	0	0	0	0.969759	0	0.672143	5S_rRNA	5S ribosomal RNA [Source:RFAM;Acc:RF00001]	-	-	-
ENSRNOG00000035148	5S_rRNA	X[-]32102778-32102898	0	0	0	0	0	0	5S_rRNA	5S ribosomal RNA [Source:RFAM;Acc:RF00001]	-	-	-
ENSRNOG00000041865	5S_rRNA	8[+]122345784-122345888	0	0	0	0	0	0	5S_rRNA	5S ribosomal RNA [Source:RFAM;Acc:RF00001]	-	-	-
ENSRNOG00000045233	5S_rRNA	1[-]32051294-32051411	0	0	0	0	0	0	5S_rRNA	5S ribosomal RNA [Source:RFAM;Acc:RF00001]	-	-	-
ENSRNOG00000043978	5S_rRNA	18[-]32756074-32756178	0	0	0	0	0	0	5S_rRNA	5S ribosomal RNA [Source:RFAM;Acc:RF00001]	-	-	-
ENSRNOG00000046419	5S_rRNA	16[-]13842911-13842983	0	0	0	0	0	0	5S_rRNA	5S ribosomal RNA [Source:RFAM;Acc:RF00001]	-	-	-
ENSRNOG00000045809	5S_rRNA	16[-]4974730-4974830	0	0	0	0	0	0	5S_rRNA	5S ribosomal RNA [Source:RFAM;Acc:RF00001]	-	-	-
ENSRNOG00000044003	5S_rRNA	20[+]49464647-49464748	0	0	0	0	0	0	5S_rRNA	5S ribosomal RNA [Source:RFAM;Acc:RF00001]	-	-	-
ENSRNOG00000045106	5S_rRNA	19[+]35035157-35035251	0	0	0	0	0	0	5S_rRNA	5S ribosomal RNA [Source:RFAM;Acc:RF00001]	-	-	-
ENSRNOG00000049293	5S_rRNA	12[-]29014554-29014656	0	0	0	0	0	0	5S_rRNA	5S ribosomal RNA [Source:RFAM;Acc:RF00001]	-	-	-
ENSRNOG00000035854	5S_rRNA	4[-]17536085-17536203	0	0	0.036092	0	0	0	5S_rRNA	5S ribosomal RNA [Source:RFAM;Acc:RF00001]	-	-	-
ENSRNOG00000041737	5S_rRNA	1[-]70440715-70440849	0	0	0	0	0	0	5S_rRNA	5S ribosomal RNA [Source:RFAM;Acc:RF00001]	-	-	-
ENSRNOG00000044895	5S_rRNA	4[-]121147297-121147430	0	0	0	0	0	0	5S_rRNA	5S ribosomal RNA [Source:RFAM;Acc:RF00001]	-	-	-
ENSRNOG00000044661	5S_rRNA	3[+]139529601-139529695	0	0	0	0	0	0	5S_rRNA	5S ribosomal RNA [Source:RFAM;Acc:RF00001]	-	-	-
ENSRNOG00000044282	5S_rRNA	6[-]109955113-109955226	0	0	0	0	0.156852	0	5S_rRNA	5S ribosomal RNA [Source:RFAM;Acc:RF00001]	-	-	-
ENSRNOG00000035957	5S_rRNA	1[+]199087125-199087243	0	0	0	0	0	0	5S_rRNA	5S ribosomal RNA [Source:RFAM;Acc:RF00001]	-	-	-
ENSRNOG00000040834	5S_rRNA	13[-]66920015-66920134	0	0	0	0	0	0	5S_rRNA	5S ribosomal RNA [Source:RFAM;Acc:RF00001]	-	-	-
ENSRNOG00000035243	5S_rRNA	11[+]83746249-83746369	0	0	0	0	0	0	5S_rRNA	5S ribosomal RNA [Source:RFAM;Acc:RF00001]	-	-	-
ENSRNOG00000044047	5S_rRNA	9[-]110547323-110547408	0	0	0	0	0	0	5S_rRNA	5S ribosomal RNA [Source:RFAM;Acc:RF00001]	-	-	-
ENSRNOG00000044722	5S_rRNA	6[-]64116290-64116380	0	0	0	0	0	0	5S_rRNA	5S ribosomal RNA [Source:RFAM;Acc:RF00001]	-	-	-
ENSRNOG00000044200	5S_rRNA	2[-]142840770-142840876	0	0	0	0	0	0	5S_rRNA	5S ribosomal RNA [Source:RFAM;Acc:RF00001]	-	-	-
ENSRNOG00000050574	5S_rRNA	10[-]105278035-105278162	0	0	0	0	0	0	5S_rRNA	5S ribosomal RNA [Source:RFAM;Acc:RF00001]	-	-	-
ENSRNOG00000044997	5S_rRNA	4[+]143489634-143489742	0	0	0	0	0	0	5S_rRNA	5S ribosomal RNA [Source:RFAM;Acc:RF00001]	-	-	-
ENSRNOG00000044990	5S_rRNA	15[+]57342172-57342282	0	0	0	0	0	0	5S_rRNA	5S ribosomal RNA [Source:RFAM;Acc:RF00001]	-	-	-
ENSRNOG00000034535	5S_rRNA	15[-]24591670-24591788	0	0	0	0	0	0	5S_rRNA	5S ribosomal RNA [Source:RFAM;Acc:RF00001]	-	-	-
ENSRNOG00000034530	5S_rRNA	20[-]33366636-33366752	0	0	0	0	0	0	5S_rRNA	5S ribosomal RNA [Source:RFAM;Acc:RF00001]	-	-	-
ENSRNOG00000048227	5S_rRNA	12[+]25290817-25290917	0	0	0	0	0	0	5S_rRNA	5S ribosomal RNA [Source:RFAM;Acc:RF00001]	-	-	-
ENSRNOG00000060018	5S_rRNA	9[+]100762523-100762641	0	0.162432	0	0.01263	0	0	5S_rRNA	5S ribosomal RNA [Source:RFAM;Acc:RF00001]	-	-	-
ENSRNOG00000041822	5S_rRNA	X[+]51691479-51691586	0	0	0	0	0	0	5S_rRNA	5S ribosomal RNA [Source:RFAM;Acc:RF00001]	-	-	-
ENSRNOG00000040715	5S_rRNA	10[-]86231389-86231511	0	0	0.233756	0.016292	0.20806	0	5S_rRNA	5S ribosomal RNA [Source:RFAM;Acc:RF00001]	-	-	-
ENSRNOG00000048387	5S_rRNA	17[+]53916364-53916483	0	0	0	0	0	0	5S_rRNA	5S ribosomal RNA [Source:RFAM;Acc:RF00001]	-	-	-
ENSRNOG00000045006	5S_rRNA	13[-]79439156-79439246	0	0	0	0	0	0	5S_rRNA	5S ribosomal RNA [Source:RFAM;Acc:RF00001]	-	-	-
ENSRNOG00000044590	5S_rRNA	9[+]44590762-44590879	0	0	0	0	0	0	5S_rRNA	5S ribosomal RNA [Source:RFAM;Acc:RF00001]	-	-	-
ENSRNOG00000044629	5S_rRNA	11[-]53453791-53453917	0	0	0	0	0	0	5S_rRNA	5S ribosomal RNA [Source:RFAM;Acc:RF00001]	-	-	-
ENSRNOG00000051573	5S_rRNA	6[+]37408951-37409031	0	0	0	0	0	0	5S_rRNA	5S ribosomal RNA [Source:RFAM;Acc:RF00001]	-	-	-
ENSRNOG00000041679	5S_rRNA	3[-]82292135-82292270	0	0	0	0	0	0	5S_rRNA	5S ribosomal RNA [Source:RFAM;Acc:RF00001]	-	-	-
ENSRNOG00000055067	5S_rRNA	19[-]56338736-56338854	7.76104	2.00679	5.27801	0	0.145851	0.43419	5S_rRNA	5S ribosomal RNA [Source:RFAM;Acc:RF00001]	-	-	-
ENSRNOG00000044126	5S_rRNA	16[-]15660279-15660304	0	0	0	0	0	0	5S_rRNA	5S ribosomal RNA [Source:RFAM;Acc:RF00001]	-	-	-
ENSRNOG00000044494	5S_rRNA	17[-]61415695-61415802	0	0	0	0	0	0	5S_rRNA	5S ribosomal RNA [Source:RFAM;Acc:RF00001]	-	-	-
ENSRNOG00000059281	5S_rRNA	8[-]78579366-78579480	0	0	0	0	0	0	5S_rRNA	5S ribosomal RNA [Source:RFAM;Acc:RF00001]	-	-	-
ENSRNOG00000045187	5S_rRNA	X[-]119875297-119875377	0	0	0	0	0	0	5S_rRNA	5S ribosomal RNA [Source:RFAM;Acc:RF00001]	-	-	-
ENSRNOG00000044512	5S_rRNA	3[-]113508348-113508427	0	0	0	0	0	0	5S_rRNA	5S ribosomal RNA [Source:RFAM;Acc:RF00001]	-	-	-
ENSRNOG00000046917	5S_rRNA	12[+]28997846-28997946	0	0	0	0	0	0	5S_rRNA	5S ribosomal RNA [Source:RFAM;Acc:RF00001]	-	-	-
ENSRNOG00000045263	5S_rRNA	12[+]26725690-26725818	0	0	0	0	0	0	5S_rRNA	5S ribosomal RNA [Source:RFAM;Acc:RF00001]	-	-	-
ENSRNOG00000045261	5S_rRNA	3[+]149709950-149710046	0	0	0	0	0	0	5S_rRNA	5S ribosomal RNA [Source:RFAM;Acc:RF00001]	-	-	-
ENSRNOG00000043983	5S_rRNA	13[+]73013656-73013778	0	0	0	0	0	0	5S_rRNA	5S ribosomal RNA [Source:RFAM;Acc:RF00001]	-	-	-
ENSRNOG00000035416	5S_rRNA	9[-]34271709-34271827	0	0	0	0	0	0	5S_rRNA	5S ribosomal RNA [Source:RFAM;Acc:RF00001]	-	-	-
ENSRNOG00000044703	5S_rRNA	18[+]27870995-27871124	0.011981	0	0	0	0	0	5S_rRNA	5S ribosomal RNA [Source:RFAM;Acc:RF00001]	-	-	-
ENSRNOG00000042015	5S_rRNA	16[+]50956695-50956804	0	0	0	0	0	0	5S_rRNA	5S ribosomal RNA [Source:RFAM;Acc:RF00001]	-	-	-
ENSRNOG00000042010	5S_rRNA	1[-]144716434-144716539	0	0	0	0	0	0	5S_rRNA	5S ribosomal RNA [Source:RFAM;Acc:RF00001]	-	-	-
ENSRNOG00000050064	5S_rRNA	3[-]114919677-114919766	0	0	0	0	0	0	5S_rRNA	5S ribosomal RNA [Source:RFAM;Acc:RF00001]	-	-	-
ENSRNOG00000050753	5S_rRNA	8[+]84353067-84353190	0	0	0	0	0	0	5S_rRNA	5S ribosomal RNA [Source:RFAM;Acc:RF00001]	-	-	-
ENSRNOG00000050757	5S_rRNA	12[-]25307525-25307627	0	0	0	0	0	0	5S_rRNA	5S ribosomal RNA [Source:RFAM;Acc:RF00001]	-	-	-
ENSRNOG00000034938	5S_rRNA	8[-]114124460-114124578	0	0	0	0	0	0	5S_rRNA	5S ribosomal RNA [Source:RFAM;Acc:RF00001]	-	-	-
ENSRNOG00000045356	5S_rRNA	11[+]64849017-64849108	0	0	0	0	0	0	5S_rRNA	5S ribosomal RNA [Source:RFAM;Acc:RF00001]	-	-	-
ENSRNOG00000041851	5S_rRNA	7[-]65097502-65097619	0	0	0	0	0	0	5S_rRNA	5S ribosomal RNA [Source:RFAM;Acc:RF00001]	-	-	-
ENSRNOG00000044820	5S_rRNA	2[-]113091260-113091365	0	0	0	0	0	0	5S_rRNA	5S ribosomal RNA [Source:RFAM;Acc:RF00001]	-	-	-
ENSRNOG00000044786	5S_rRNA	2[-]166385179-166385315	0	0	0	0	0	0	5S_rRNA	5S ribosomal RNA [Source:RFAM;Acc:RF00001]	-	-	-
ENSRNOG00000044784	5S_rRNA	6[+]127776496-127776606	0	0	0	0	0	0	5S_rRNA	5S ribosomal RNA [Source:RFAM;Acc:RF00001]	-	-	-
ENSRNOG00000055521	5S_rRNA	9[-]112905940-112906058	0	0	0	0	0	0	5S_rRNA	5S ribosomal RNA [Source:RFAM;Acc:RF00001]	-	-	-
ENSRNOG00000034503	5S_rRNA	8[+]49402607-49402712	0	0	0	0	0	0.214192	5S_rRNA	5S ribosomal RNA [Source:RFAM;Acc:RF00001]	-	-	-
ENSRNOG00000044429	5S_rRNA	15[+]46039543-46039661	0	0	0	0	0	0	5S_rRNA	5S ribosomal RNA [Source:RFAM;Acc:RF00001]	-	-	-
ENSRNOG00000044574	5S_rRNA	4[-]11017828-11017937	0	0	0	0	0	0	5S_rRNA	5S ribosomal RNA [Source:RFAM;Acc:RF00001]	-	-	-
ENSRNOG00000034316	5S_rRNA	7[-]71289633-71289748	0	0	0	0	0	0	5S_rRNA	5S ribosomal RNA [Source:RFAM;Acc:RF00001]	-	-	-
ENSRNOG00000040749	5S_rRNA	3[-]160548679-160548794	0	0	0	0	0	0	5S_rRNA	5S ribosomal RNA [Source:RFAM;Acc:RF00001]	-	-	-
ENSRNOG00000044095	5S_rRNA	14[-]31878169-31878194	0	0	0	0	0	0	5S_rRNA	5S ribosomal RNA [Source:RFAM;Acc:RF00001]	-	-	-
ENSRNOG00000060766	5S_rRNA	18[+]31515544-31515649	0	0	0	0	0	0	5S_rRNA	5S ribosomal RNA [Source:RFAM;Acc:RF00001]	-	-	-
ENSRNOG00000047701	5S_rRNA	6[+]7157013-7157120	0	0	0	0	0	0	5S_rRNA	5S ribosomal RNA [Source:RFAM;Acc:RF00001]	-	-	-
ENSRNOG00000044940	5S_rRNA	1[-]79664381-79664495	0	0	0	0	0	0	5S_rRNA	5S ribosomal RNA [Source:RFAM;Acc:RF00001]	-	-	-
ENSRNOG00000045399	5S_rRNA	13[-]101869739-101869846	0	0	0	0	0	0	5S_rRNA	5S ribosomal RNA [Source:RFAM;Acc:RF00001]	-	-	-
ENSRNOG00000053530	5S_rRNA	2[+]45268633-45268751	0	0	0	0	0	0	5S_rRNA	5S ribosomal RNA [Source:RFAM;Acc:RF00001]	-	-	-
ENSRNOG00000044353	5S_rRNA	8[+]67470120-67470228	0	0	0	0	0	0	5S_rRNA	5S ribosomal RNA [Source:RFAM;Acc:RF00001]	-	-	-
ENSRNOG00000048135	5S_rRNA	1[+]264649114-264649232	0.01178	0	0	0	0	0	5S_rRNA	5S ribosomal RNA [Source:RFAM;Acc:RF00001]	-	-	-
ENSRNOG00000044078	5S_rRNA	18[-]53299708-53299811	0	0	0	0	0	0	5S_rRNA	5S ribosomal RNA [Source:RFAM;Acc:RF00001]	-	-	-
ENSRNOG00000061003	5S_rRNA	2[-]67757558-67757666	0	0	0	0	0	0	5S_rRNA	5S ribosomal RNA [Source:RFAM;Acc:RF00001]	-	-	-
ENSRNOG00000034421	5S_rRNA	7[-]56875488-56875605	0	0	0	0	0	0	5S_rRNA	5S ribosomal RNA [Source:RFAM;Acc:RF00001]	-	-	-
ENSRNOG00000048338	5S_rRNA	9[+]30067722-30067820	0.032645	0	0	0	0	0	5S_rRNA	5S ribosomal RNA [Source:RFAM;Acc:RF00001]	-	-	-
ENSRNOG00000045175	5S_rRNA	10[+]8469912-8470006	0	0	0	0	0	0	5S_rRNA	5S ribosomal RNA [Source:RFAM;Acc:RF00001]	-	-	-
ENSRNOG00000035293	5S_rRNA	6[+]114332847-114332974	0.010951	0	0	0	0	0	5S_rRNA	5S ribosomal RNA [Source:RFAM;Acc:RF00001]	-	-	-
ENSRNOG00000035837	5S_rRNA	20[+]19735145-19735246	0	0.152673	0	0	0.154397	0.063598	5S_rRNA	5S ribosomal RNA [Source:RFAM;Acc:RF00001]	-	-	-
ENSRNOG00000041968	5S_rRNA	4[-]50674037-50674174	0	0	0	0	0	0	5S_rRNA	5S ribosomal RNA [Source:RFAM;Acc:RF00001]	-	-	-
ENSRNOG00000047325	5S_rRNA	1[+]264175839-264175957	0	0	0	0.064551	0	0.187179	5S_rRNA	5S ribosomal RNA [Source:RFAM;Acc:RF00001]	-	-	-
ENSRNOG00000045251	5S_rRNA	7[-]64957932-64958068	0	0	0	0	0	0	5S_rRNA	5S ribosomal RNA [Source:RFAM;Acc:RF00001]	-	-	-
ENSRNOG00000043952	5S_rRNA	9[-]50874736-50874855	0	0	0	0	0.527686	0.417598	5S_rRNA	5S ribosomal RNA [Source:RFAM;Acc:RF00001]	-	-	-
ENSRNOG00000035312	5S_rRNA	14[-]93047265-93047384	0	0	0	0	0	0	5S_rRNA	5S ribosomal RNA [Source:RFAM;Acc:RF00001]	-	-	-
ENSRNOG00000046771	5S_rRNA	3[+]41769648-41769766	0	0	0	0	0	0	5S_rRNA	5S ribosomal RNA [Source:RFAM;Acc:RF00001]	-	-	-
ENSRNOG00000050776	5S_rRNA	16[+]20205911-20206005	0	0	0	0	0	0	5S_rRNA	5S ribosomal RNA [Source:RFAM;Acc:RF00001]	-	-	-
ENSRNOG00000034905	5S_rRNA	18[+]78818845-78818954	0	0	0	0	0	0	5S_rRNA	5S ribosomal RNA [Source:RFAM;Acc:RF00001]	-	-	-
ENSRNOG00000044284	5S_rRNA	X[-]71782844-71782963	0	0	0	0	0	0	5S_rRNA	5S ribosomal RNA [Source:RFAM;Acc:RF00001]	-	-	-
ENSRNOG00000044193	5S_rRNA	14[-]66684946-66685048	0	0	0	0	0	0	5S_rRNA	5S ribosomal RNA [Source:RFAM;Acc:RF00001]	-	-	-
ENSRNOG00000045087	5S_rRNA	1[+]177946007-177946117	0	0	0	0	0	0	5S_rRNA	5S ribosomal RNA [Source:RFAM;Acc:RF00001]	-	-	-
ENSRNOG00000045084	5S_rRNA	3[+]60364149-60364249	0	0	0	0	0	0	5S_rRNA	5S ribosomal RNA [Source:RFAM;Acc:RF00001]	-	-	-
ENSRNOG00000044601	5S_rRNA	8[-]111941243-111941363	0	0	0	0	0	0	5S_rRNA	5S ribosomal RNA [Source:RFAM;Acc:RF00001]	-	-	-
ENSRNOG00000035975	5S_rRNA	16[+]39300267-39300385	0	0	0	0	0	0	5S_rRNA	5S ribosomal RNA [Source:RFAM;Acc:RF00001]	-	-	-
ENSRNOG00000045510	5S_rRNA	20[+]37200789-37200901	0	0	0	0	0	0	5S_rRNA	5S ribosomal RNA [Source:RFAM;Acc:RF00001]	-	-	-
ENSRNOG00000045755	5S_rRNA	11[-]89141610-89141718	0	0	0	0	0	0	5S_rRNA	5S ribosomal RNA [Source:RFAM;Acc:RF00001]	-	-	-
ENSRNOG00000050725	5S_rRNA	16[-]26999940-27000074	0	0	0	0	0	0	5S_rRNA	5S ribosomal RNA [Source:RFAM;Acc:RF00001]	-	-	-
ENSRNOG00000041877	5S_rRNA	X[+]10380729-10380841	0	0	0	0	0	0	5S_rRNA	5S ribosomal RNA [Source:RFAM;Acc:RF00001]	-	-	-
ENSRNOG00000055727	5S_rRNA	19[+]54166954-54167072	0	0	0	0	0	0	5S_rRNA	5S ribosomal RNA [Source:RFAM;Acc:RF00001]	-	-	-
ENSRNOG00000045002	5S_rRNA	13[-]108245498-108245591	0	0	0	0	0	0	5S_rRNA	5S ribosomal RNA [Source:RFAM;Acc:RF00001]	-	-	-
ENSRNOG00000045032	5S_rRNA	9[-]26776809-26776927	0	0	0	0	0	0	5S_rRNA	5S ribosomal RNA [Source:RFAM;Acc:RF00001]	-	-	-
ENSRNOG00000045036	5S_rRNA	2[+]66694828-66694947	0	0	0	0	0	0	5S_rRNA	5S ribosomal RNA [Source:RFAM;Acc:RF00001]	-	-	-
ENSRNOG00000034799	5S_rRNA	9[-]64068808-64068918	1.2469	0.493493	0.369302	0	0.045519	0.043246	5S_rRNA	5S ribosomal RNA [Source:RFAM;Acc:RF00001]	-	-	-
ENSRNOG00000049379	5S_rRNA	11[-]5785788-5785898	0	0	0	0	0	0	5S_rRNA	5S ribosomal RNA [Source:RFAM;Acc:RF00001]	-	-	-
ENSRNOG00000034612	5S_rRNA	8[-]39196689-39196807	0	0	0.036092	0	0	0	5S_rRNA	5S ribosomal RNA [Source:RFAM;Acc:RF00001]	-	-	-
ENSRNOG00000056835	5S_rRNA	Y[-]83879-83997	3.2157	0.880975	1.11323	0	0.042459	0.139824	5S_rRNA	5S ribosomal RNA [Source:RFAM;Acc:RF00001]	-	-	-
ENSRNOG00000050622	5S_rRNA	17[+]53714696-53714815	0	0	0	0	0	0	5S_rRNA	5S ribosomal RNA [Source:RFAM;Acc:RF00001]	-	-	-
ENSRNOG00000044386	5S_rRNA	16[-]50847006-50847112	0	0	0	0	0	0	5S_rRNA	5S ribosomal RNA [Source:RFAM;Acc:RF00001]	-	-	-
ENSRNOG00000044385	5S_rRNA	6[+]29932834-29932950	0	0	0	0	0	0	5S_rRNA	5S ribosomal RNA [Source:RFAM;Acc:RF00001]	-	-	-
ENSRNOG00000034458	5S_rRNA	12[+]7667974-7668082	0	0	0	0	0	0	5S_rRNA	5S ribosomal RNA [Source:RFAM;Acc:RF00001]	-	-	-
ENSRNOG00000041881	5S_rRNA	16[-]27442743-27442862	0	0	0	0	0	0	5S_rRNA	5S ribosomal RNA [Source:RFAM;Acc:RF00001]	-	-	-
ENSRNOG00000044128	5S_rRNA	20[+]46580451-46580567	0	0	0	0	0	0	5S_rRNA	5S ribosomal RNA [Source:RFAM;Acc:RF00001]	-	-	-
ENSRNOG00000045206	5S_rRNA	6[-]121315938-121316042	0	0	0	0	0	0	5S_rRNA	5S ribosomal RNA [Source:RFAM;Acc:RF00001]	-	-	-
ENSRNOG00000044930	5S_rRNA	6[-]28578543-28578663	0	0	0	0	0	0	5S_rRNA	5S ribosomal RNA [Source:RFAM;Acc:RF00001]	-	-	-
ENSRNOG00000044937	5S_rRNA	18[+]27292866-27292980	0	0	0	0	0	0	5S_rRNA	5S ribosomal RNA [Source:RFAM;Acc:RF00001]	-	-	-
ENSRNOG00000045327	5S_rRNA	1[-]87611917-87612029	0	0	0	0	0	0	5S_rRNA	5S ribosomal RNA [Source:RFAM;Acc:RF00001]	-	-	-
ENSRNOG00000045322	5S_rRNA	5[+]59194165-59194297	0	0	0	0	0	0	5S_rRNA	5S ribosomal RNA [Source:RFAM;Acc:RF00001]	-	-	-
ENSRNOG00000041670	5S_rRNA	8[-]119868123-119868238	0	0	0	0	0	0	5S_rRNA	5S ribosomal RNA [Source:RFAM;Acc:RF00001]	-	-	-
ENSRNOG00000041673	5S_rRNA	4[-]117316150-117316260	0	0	0	0	0	0	5S_rRNA	5S ribosomal RNA [Source:RFAM;Acc:RF00001]	-	-	-
ENSRNOG00000041675	5S_rRNA	8[-]130864689-130864809	0	0	0	0	0	0	5S_rRNA	5S ribosomal RNA [Source:RFAM;Acc:RF00001]	-	-	-
ENSRNOG00000034695	5S_rRNA	19[-]38074226-38074343	0	0	0	0	0	0	5S_rRNA	5S ribosomal RNA [Source:RFAM;Acc:RF00001]	-	-	-
ENSRNOG00000044303	5S_rRNA	20[-]50280971-50281078	0	0	0	0	0	0	5S_rRNA	5S ribosomal RNA [Source:RFAM;Acc:RF00001]	-	-	-
ENSRNOG00000044300	5S_rRNA	16[-]60060543-60060654	0	0	0	0	0	0	5S_rRNA	5S ribosomal RNA [Source:RFAM;Acc:RF00001]	-	-	-
ENSRNOG00000045491	5S_rRNA	1[+]47041989-47042105	0	0	0	0	0	0	5S_rRNA	5S ribosomal RNA [Source:RFAM;Acc:RF00001]	-	-	-
ENSRNOG00000045493	5S_rRNA	16[-]25578300-25578412	0	0	0	0	0	0	5S_rRNA	5S ribosomal RNA [Source:RFAM;Acc:RF00001]	-	-	-
ENSRNOG00000041970	5S_rRNA	1[+]270635181-270635288	0	0	0	0	0	0	5S_rRNA	5S ribosomal RNA [Source:RFAM;Acc:RF00001]	-	-	-
ENSRNOG00000041974	5S_rRNA	1[-]249644059-249644166	0	0	0	0	0	0	5S_rRNA	5S ribosomal RNA [Source:RFAM;Acc:RF00001]	-	-	-
ENSRNOG00000040532	5S_rRNA	7[+]52188781-52188899	0	0	0	0	0	0	5S_rRNA	5S ribosomal RNA [Source:RFAM;Acc:RF00001]	-	-	-
ENSRNOG00000041728	5S_rRNA	7[-]15055478-15055571	0	0	0	0	0	0	5S_rRNA	5S ribosomal RNA [Source:RFAM;Acc:RF00001]	-	-	-
ENSRNOG00000041725	5S_rRNA	10[+]36306327-36306443	0	0	0	0	0	0	5S_rRNA	5S ribosomal RNA [Source:RFAM;Acc:RF00001]	-	-	-
ENSRNOG00000041723	5S_rRNA	9[+]31641760-31641865	0	0	0	0	0	0	5S_rRNA	5S ribosomal RNA [Source:RFAM;Acc:RF00001]	-	-	-
ENSRNOG00000041720	5S_rRNA	1[+]28595961-28596073	0	0	0	0	0.104526	0.050231	5S_rRNA	5S ribosomal RNA [Source:RFAM;Acc:RF00001]	-	-	-
ENSRNOG00000041721	5S_rRNA	15[+]87221734-87221838	0	0	0	0	0	0	5S_rRNA	5S ribosomal RNA [Source:RFAM;Acc:RF00001]	-	-	-
ENSRNOG00000047373	5S_rRNA	9[+]32722659-32722750	0	0	0	0	0	0	5S_rRNA	5S ribosomal RNA [Source:RFAM;Acc:RF00001]	-	-	-
ENSRNOG00000044880	5S_rRNA	8[-]64903584-64903692	0	0	0	0	0	0	5S_rRNA	5S ribosomal RNA [Source:RFAM;Acc:RF00001]	-	-	-
ENSRNOG00000044889	5S_rRNA	9[+]81051937-81052027	0	0	0	0	0	0	5S_rRNA	5S ribosomal RNA [Source:RFAM;Acc:RF00001]	-	-	-
ENSRNOG00000043886	5S_rRNA	13[+]7160201-7160310	0	0	0	0	0	0	5S_rRNA	5S ribosomal RNA [Source:RFAM;Acc:RF00001]	-	-	-
ENSRNOG00000044767	5S_rRNA	4[-]125508104-125508199	0	0	0	0	0	0	5S_rRNA	5S ribosomal RNA [Source:RFAM;Acc:RF00001]	-	-	-
ENSRNOG00000036200	5S_rRNA	13[+]58460922-58461036	0	0	0	0	0	0	5S_rRNA	5S ribosomal RNA [Source:RFAM;Acc:RF00001]	-	-	-
ENSRNOG00000060813	5S_rRNA	13[-]100451994-100452108	0	0	0	0	0	0	5S_rRNA	5S ribosomal RNA [Source:RFAM;Acc:RF00001]	-	-	-
ENSRNOG00000045172	5S_rRNA	3[+]137613125-137613245	0	0	0	0	0	0	5S_rRNA	5S ribosomal RNA [Source:RFAM;Acc:RF00001]	-	-	-
ENSRNOG00000040821	5S_rRNA	11[+]11978348-11978454	0	0	0	0	0	0	5S_rRNA	5S ribosomal RNA [Source:RFAM;Acc:RF00001]	-	-	-
ENSRNOG00000041053	5S_rRNA	8[+]39495976-39496084	0	0	0	0	0	0	5S_rRNA	5S ribosomal RNA [Source:RFAM;Acc:RF00001]	-	-	-
ENSRNOG00000044076	5S_rRNA	1[+]221520759-221520838	0	0	0	0	0	0	5S_rRNA	5S ribosomal RNA [Source:RFAM;Acc:RF00001]	-	-	-
ENSRNOG00000044660	5S_rRNA	6[-]116965665-116965762	0	0	0	0	0	0	5S_rRNA	5S ribosomal RNA [Source:RFAM;Acc:RF00001]	-	-	-
ENSRNOG00000035926	5S_rRNA	18[-]59603994-59604115	0	0	0	0	0	0	5S_rRNA	5S ribosomal RNA [Source:RFAM;Acc:RF00001]	-	-	-
ENSRNOG00000045650	5S_rRNA	3[+]159426718-159426836	0	0	0	0	0	0	5S_rRNA	5S ribosomal RNA [Source:RFAM;Acc:RF00001]	-	-	-
ENSRNOG00000043884	5S_rRNA	9[-]15728073-15728184	0	0	0	0	0	0	5S_rRNA	5S ribosomal RNA [Source:RFAM;Acc:RF00001]	-	-	-
ENSRNOG00000045070	5S_rRNA	10[+]78714986-78715086	0	0	0	0	0	0	5S_rRNA	5S ribosomal RNA [Source:RFAM;Acc:RF00001]	-	-	-
ENSRNOG00000049473	5S_rRNA	2[+]230213324-230213440	0	0	0	0	0	0	5S_rRNA	5S ribosomal RNA [Source:RFAM;Acc:RF00001]	-	-	-
ENSRNOG00000061716	7420426K07Rik	8[+]107155220-107155930	0	0	0	0	0	0	7420426K07Rik	RIKEN cDNA 7420426K07 gene [Source:MGI Symbol;Acc:MGI:3588253]	-	-	-
ENSRNOG00000058358	7530416G11Rik	7[-]126381793-126382449	0	0	0	0	0	0	7530416G11Rik	RIKEN cDNA 7530416G11 gene [Source:MGI Symbol;Acc:MGI:3036279]	-	-	-
ENSRNOG00000057148	7SK	9[+]85010536-85010866	0	0	0	0	0	0	7SK	7SK RNA [Source:RFAM;Acc:RF00100]	-	-	-
ENSRNOG00000053798	7SK	17[+]31301673-31301964	0	0	0	0	0	0	7SK	7SK RNA [Source:RFAM;Acc:RF00100]	-	-	-
ENSRNOG00000060003	7SK	5[+]105094215-105094455	0	0	0	0	0	0	7SK	7SK RNA [Source:RFAM;Acc:RF00100]	-	-	-
ENSRNOG00000052223	7SK	6[-]77154792-77155062	0	0	0	0	0	0	7SK	7SK RNA [Source:RFAM;Acc:RF00100]	-	-	-
ENSRNOG00000057303	7SK	1[+]100213547-100213823	0	0	0	0	0	0	7SK	7SK RNA [Source:RFAM;Acc:RF00100]	-	-	-
ENSRNOG00000055219	7SK	1[-]90959650-90959958	0	0	0	0	0.095748	0.118088	7SK	7SK RNA [Source:RFAM;Acc:RF00100]	-	-	-
ENSRNOG00000060704	7SK	5[+]61714506-61714811	0.03722	0	0.002729	0.158806	0.017155	0.031799	7SK	7SK RNA [Source:RFAM;Acc:RF00100]	-	-	-
ENSRNOG00000055052	7SK	9[+]115765799-115766117	0	0	0	0	0	0	7SK	7SK RNA [Source:RFAM;Acc:RF00100]	-	-	-
ENSRNOG00000055584	7SK	2[-]213207770-213208060	0	0	0	0	0	0	7SK	7SK RNA [Source:RFAM;Acc:RF00100]	-	-	-
ENSRNOG00000059535	7SK	4[+]143869621-143869911	0	0	0	0	0	0	7SK	7SK RNA [Source:RFAM;Acc:RF00100]	-	-	-
ENSRNOG00000052585	7SK	8[+]13762763-13762851	0	0	0	0	0	0	7SK	7SK RNA [Source:RFAM;Acc:RF00100]	-	-	-
ENSRNOG00000058964	7SK	4[+]17842423-17842520	0	0	0	0	0	0	7SK	7SK RNA [Source:RFAM;Acc:RF00100]	-	-	-
ENSRNOG00000059234	7SK	10[+]43392095-43392365	0	0	0	0	0	0	7SK	7SK RNA [Source:RFAM;Acc:RF00100]	-	-	-
ENSRNOG00000054283	7SK	2[+]259794494-259794782	0	0	0	0	0	0	7SK	7SK RNA [Source:RFAM;Acc:RF00100]	-	-	-
ENSRNOG00000054280	7SK	5[+]101381601-101381899	0	0	0	0	0	0	7SK	7SK RNA [Source:RFAM;Acc:RF00100]	-	-	-
ENSRNOG00000056602	7SK	1[+]234591718-234592009	0	0	0	0	0	0	7SK	7SK RNA [Source:RFAM;Acc:RF00100]	-	-	-
ENSRNOG00000052939	7SK	4[+]143430741-143431042	0	0	0	0	0	0	7SK	7SK RNA [Source:RFAM;Acc:RF00100]	-	-	-
ENSRNOG00000053714	7SK	15[+]19143303-19143621	0	0	0	0	0	0	7SK	7SK RNA [Source:RFAM;Acc:RF00100]	-	-	-
ENSRNOG00000059548	7SK	7[+]67545559-67545823	0	0	0	0	0	0	7SK	7SK RNA [Source:RFAM;Acc:RF00100]	-	-	-
ENSRNOG00000061353	7SK	8[+]21823121-21823212	0	0	0	0	0	0	7SK	7SK RNA [Source:RFAM;Acc:RF00100]	-	-	-
ENSRNOG00000060080	7SK	14[-]20066846-20067161	0	0	0	0	0	0	7SK	7SK RNA [Source:RFAM;Acc:RF00100]	-	-	-
ENSRNOG00000057073	7SK	13[-]83715584-83715854	0	0	0	0	0	0	7SK	7SK RNA [Source:RFAM;Acc:RF00100]	-	-	-
ENSRNOG00000061840	7SK	14[+]49391749-49391841	0	0	0	0	0	0	7SK	7SK RNA [Source:RFAM;Acc:RF00100]	-	-	-
ENSRNOG00000054744	7SK	16[-]71162872-71163163	0	0	0	0	0	0	7SK	7SK RNA [Source:RFAM;Acc:RF00100]	-	-	-
ENSRNOG00000054034	7SK	20[+]2978653-2978758	0	0	0	0	0	0	7SK	7SK RNA [Source:RFAM;Acc:RF00100]	-	-	-
ENSRNOG00000056247	7SK	18[+]40542094-40542431	0.15725	0.030071	0.021178	0.068674	0.056009	0.223109	7SK	7SK RNA [Source:RFAM;Acc:RF00100]	-	-	-
ENSRNOG00000057625	7SK	6[-]83242251-83242337	0	0	0	0	0	0	7SK	7SK RNA [Source:RFAM;Acc:RF00100]	-	-	-
ENSRNOG00000051509	7SK	X[+]137025156-137025490	0	0	0	0	0	0.006656	7SK	7SK RNA [Source:RFAM;Acc:RF00100]	-	-	-
ENSRNOG00000061780	7SK	18[+]35102629-35102930	0	0	0	0	0	0	7SK	7SK RNA [Source:RFAM;Acc:RF00100]	-	-	-
ENSRNOG00000052504	7SK	7[-]50726190-50726484	0	0	0	0	0	0	7SK	7SK RNA [Source:RFAM;Acc:RF00100]	-	-	-
ENSRNOG00000053298	7SK	4[+]135196771-135197069	0	0	0	0	0	0	7SK	7SK RNA [Source:RFAM;Acc:RF00100]	-	-	-
ENSRNOG00000053008	7SK	10[-]96050404-96050704	0	0	0	0	0	0	7SK	7SK RNA [Source:RFAM;Acc:RF00100]	-	-	-
ENSRNOG00000058789	7SK	10[+]36724026-36724278	0.177846	0.452293	0.081579	1.08842	1.03421	1.4211	7SK	7SK RNA [Source:RFAM;Acc:RF00100]	-	-	-
ENSRNOG00000059782	7SK	7[+]5659777-5660072	0	0	0	0	0	0	7SK	7SK RNA [Source:RFAM;Acc:RF00100]	-	-	-
ENSRNOG00000052317	7SK	15[+]64346703-64346801	0	0	0	0	0	0	7SK	7SK RNA [Source:RFAM;Acc:RF00100]	-	-	-
ENSRNOG00000052316	7SK	17[+]10713397-10713667	0	0	0	0	0	0	7SK	7SK RNA [Source:RFAM;Acc:RF00100]	-	-	-
ENSRNOG00000061134	7SK	4[-]132337370-132337715	0	0	0	0	0	0	7SK	7SK RNA [Source:RFAM;Acc:RF00100]	-	-	-
ENSRNOG00000054944	7SK	5[-]101849281-101849625	0	0	0	0	0	0	7SK	7SK RNA [Source:RFAM;Acc:RF00100]	-	-	-
ENSRNOG00000060377	7SK	17[+]26541235-26541475	0	0	0	0	0	0	7SK	7SK RNA [Source:RFAM;Acc:RF00100]	-	-	-
ENSRNOG00000053454	7SK	4[+]11286528-11286817	0	0	0	0	0	0	7SK	7SK RNA [Source:RFAM;Acc:RF00100]	-	-	-
ENSRNOG00000053980	7SK	11[+]3269448-3269788	0	0	0	0	0	0	7SK	7SK RNA [Source:RFAM;Acc:RF00100]	-	-	-
ENSRNOG00000051583	7SK	13[-]102768695-102768771	0	0	0	0	0	0	7SK	7SK RNA [Source:RFAM;Acc:RF00100]	-	-	-
ENSRNOG00000059638	7SK	3[-]139671170-139671452	0	0	0	0	0	0	7SK	7SK RNA [Source:RFAM;Acc:RF00100]	-	-	-
ENSRNOG00000054666	7SK	5[-]55823582-55823680	0	0	0	0	0	0	7SK	7SK RNA [Source:RFAM;Acc:RF00100]	-	-	-
ENSRNOG00000052447	7SK	15[+]32756457-32756795	0	0	0	0	0	0	7SK	7SK RNA [Source:RFAM;Acc:RF00100]	-	-	-
ENSRNOG00000052426	7SK	7[-]109352263-109352581	0	0	0	0	0	0	7SK	7SK RNA [Source:RFAM;Acc:RF00100]	-	-	-
ENSRNOG00000052985	7SK	12[+]46247994-46248116	0	0	0	0	0	0	7SK	7SK RNA [Source:RFAM;Acc:RF00100]	-	-	-
ENSRNOG00000055744	7SK	5[+]42395559-42395657	0	0	0	0	0	0	7SK	7SK RNA [Source:RFAM;Acc:RF00100]	-	-	-
ENSRNOG00000055740	7SK	20[+]2971759-2972061	0	0	0	0	0	0	7SK	7SK RNA [Source:RFAM;Acc:RF00100]	-	-	-
ENSRNOG00000056461	7SK	11[+]67237679-67237761	0	0	0	0	0	0	7SK	7SK RNA [Source:RFAM;Acc:RF00100]	-	-	-
ENSRNOG00000060433	7SK	11[-]72398148-72398353	0	0	0	0	0	0	7SK	7SK RNA [Source:RFAM;Acc:RF00100]	-	-	-
ENSRNOG00000053316	7SK	1[-]208830779-208831085	0	0	0	0	0	0	7SK	7SK RNA [Source:RFAM;Acc:RF00100]	-	-	-
ENSRNOG00000054372	7SK	14[+]100762306-100762628	0	0	0	0	0	0	7SK	7SK RNA [Source:RFAM;Acc:RF00100]	-	-	-
ENSRNOG00000053669	7SK	2[+]182583792-182584121	0	0	0	0	0	0	7SK	7SK RNA [Source:RFAM;Acc:RF00100]	-	-	-
ENSRNOG00000057783	7SK	2[+]48263849-48264040	0	0	0	0	0	0	7SK	7SK RNA [Source:RFAM;Acc:RF00100]	-	-	-
ENSRNOG00000057781	7SK	12[-]48724315-48724412	0	0	0	0	0	0	7SK	7SK RNA [Source:RFAM;Acc:RF00100]	-	-	-
ENSRNOG00000059774	7SK	12[-]6348517-6348776	0	0	0	0	0	0	7SK	7SK RNA [Source:RFAM;Acc:RF00100]	-	-	-
ENSRNOG00000057422	7SK	9[-]86318155-86318466	0	0	0	0	0.199801	0	7SK	7SK RNA [Source:RFAM;Acc:RF00100]	-	-	-
ENSRNOG00000052711	7SK	10[+]103384126-103384359	0	0	0	0	0	0	7SK	7SK RNA [Source:RFAM;Acc:RF00100]	-	-	-
ENSRNOG00000059946	7SK	20[-]14164521-14164851	0	0	0	0	0	0	7SK	7SK RNA [Source:RFAM;Acc:RF00100]	-	-	-
ENSRNOG00000061200	7SK	15[-]85171562-85171838	0	0	0	0	0	0	7SK	7SK RNA [Source:RFAM;Acc:RF00100]	-	-	-
ENSRNOG00000061207	7SK	X[+]102150523-102150729	0	0	0	0	0	0	7SK	7SK RNA [Source:RFAM;Acc:RF00100]	-	-	-
ENSRNOG00000058835	7SK	3[+]163446932-163447272	0	0	0	0	0	0	7SK	7SK RNA [Source:RFAM;Acc:RF00100]	-	-	-
ENSRNOG00000052727	7SK	4[+]2660452-2660742	0	0	0	0	0	0	7SK	7SK RNA [Source:RFAM;Acc:RF00100]	-	-	-
ENSRNOG00000058934	7SK	5[+]25546110-25546434	0	0	0	0	0	0	7SK	7SK RNA [Source:RFAM;Acc:RF00100]	-	-	-
ENSRNOG00000054586	7SK	14[+]7051486-7051819	0	0	0	0.020999	0.169941	0.484094	7SK	7SK RNA [Source:RFAM;Acc:RF00100]	-	-	-
ENSRNOG00000052321	7SK	11[-]55842674-55842934	0	0	0	0	0	0	7SK	7SK RNA [Source:RFAM;Acc:RF00100]	-	-	-
ENSRNOG00000056517	7SK	10[+]90220206-90220474	0	0	0	0	0	0	7SK	7SK RNA [Source:RFAM;Acc:RF00100]	-	-	-
ENSRNOG00000057954	7SK	15[-]1314809-1315119	0	0	0	0	0	0	7SK	7SK RNA [Source:RFAM;Acc:RF00100]	-	-	-
ENSRNOG00000057951	7SK	13[+]89858906-89858990	0	0	0	0	0	0	7SK	7SK RNA [Source:RFAM;Acc:RF00100]	-	-	-
ENSRNOG00000054798	7SK	1[+]75508664-75509002	0	0	0	0	0	0	7SK	7SK RNA [Source:RFAM;Acc:RF00100]	-	-	-
ENSRNOG00000052820	7SK	14[+]3385156-3385445	0	0	0	0	0	0	7SK	7SK RNA [Source:RFAM;Acc:RF00100]	-	-	-
ENSRNOG00000052826	7SK	5[-]8729770-8730091	0	0	0	0.174771	0	0	7SK	7SK RNA [Source:RFAM;Acc:RF00100]	-	-	-
ENSRNOG00000056239	7SK	4[-]33536966-33537250	0	0	0	0	0	0	7SK	7SK RNA [Source:RFAM;Acc:RF00100]	-	-	-
ENSRNOG00000057547	7SK	6[+]28837994-28838299	0	0	0	0	0	0	7SK	7SK RNA [Source:RFAM;Acc:RF00100]	-	-	-
ENSRNOG00000054899	7SK	11[+]35158139-35158379	0	0	0	0	0	0	7SK	7SK RNA [Source:RFAM;Acc:RF00100]	-	-	-
ENSRNOG00000054897	7SK	8[+]97413356-97413621	0	0	0	0	0	0	7SK	7SK RNA [Source:RFAM;Acc:RF00100]	-	-	-
ENSRNOG00000060575	7SK	12[-]6108445-6108753	0	0	0	0	0	0	7SK	7SK RNA [Source:RFAM;Acc:RF00100]	-	-	-
ENSRNOG00000055859	7SK	4[-]40885957-40886055	0	0	0	0	0	0	7SK	7SK RNA [Source:RFAM;Acc:RF00100]	-	-	-
ENSRNOG00000061284	7SK	4[-]176264202-176264429	0	0	0	0	0	0	7SK	7SK RNA [Source:RFAM;Acc:RF00100]	-	-	-
ENSRNOG00000060155	7SK	8[+]17657163-17657482	0	0	0	0	0	0	7SK	7SK RNA [Source:RFAM;Acc:RF00100]	-	-	-
ENSRNOG00000058514	7SK	17[-]60418175-60418473	0	0	0	0	0	0	7SK	7SK RNA [Source:RFAM;Acc:RF00100]	-	-	-
ENSRNOG00000054615	7SK	13[+]5099890-5099987	0	0	0	0	0	0	7SK	7SK RNA [Source:RFAM;Acc:RF00100]	-	-	-
ENSRNOG00000052610	7SK	10[-]69763660-69763917	0	0	0	0	0	0	7SK	7SK RNA [Source:RFAM;Acc:RF00100]	-	-	-
ENSRNOG00000058751	7SK	12[+]2164012-2164278	0.172451	0.130006	0	0.187631	0.178793	0.30977	7SK	7SK RNA [Source:RFAM;Acc:RF00100]	-	-	-
ENSRNOG00000060834	7SK	18[+]16703761-16704067	0	0	0	0	0	0	7SK	7SK RNA [Source:RFAM;Acc:RF00100]	-	-	-
ENSRNOG00000061125	7SK	4[-]177070627-177070906	0	0	0	0	0	0	7SK	7SK RNA [Source:RFAM;Acc:RF00100]	-	-	-
ENSRNOG00000057246	7SK	1[-]257148131-257148404	0	0	0	0	0	0	7SK	7SK RNA [Source:RFAM;Acc:RF00100]	-	-	-
ENSRNOG00000055733	7SK	17[-]88088089-88088311	0	0	0	0	0	0	7SK	7SK RNA [Source:RFAM;Acc:RF00100]	-	-	-
ENSRNOG00000054101	7SK	10[-]76628529-76628833	0	0	0	0	0	0	7SK	7SK RNA [Source:RFAM;Acc:RF00100]	-	-	-
ENSRNOG00000061413	7SK	4[+]160416101-160416404	0	0	0	0	0	0	7SK	7SK RNA [Source:RFAM;Acc:RF00100]	-	-	-
ENSRNOG00000052031	7SK	5[-]2828828-2829111	0	0	0	0	0	0	7SK	7SK RNA [Source:RFAM;Acc:RF00100]	-	-	-
ENSRNOG00000053636	7SK	14[+]115409007-115409284	0	0	0	0.180207	0	0	7SK	7SK RNA [Source:RFAM;Acc:RF00100]	-	-	-
ENSRNOG00000056841	7SK	6[+]110820478-110820748	0	0	0	0	0	0	7SK	7SK RNA [Source:RFAM;Acc:RF00100]	-	-	-
ENSRNOG00000056848	7SK	8[-]62078829-62079122	0	0	0	0	0	0	7SK	7SK RNA [Source:RFAM;Acc:RF00100]	-	-	-
ENSRNOG00000056308	7SK	12[-]2517764-2518045	0	0	0	0	0.078533	0.031055	7SK	7SK RNA [Source:RFAM;Acc:RF00100]	-	-	-
ENSRNOG00000051565	7SK	4[+]75730694-75731016	0	0	0	0	0	0	7SK	7SK RNA [Source:RFAM;Acc:RF00100]	-	-	-
ENSRNOG00000059396	7SK	19[+]17244467-17244743	0	0	0	0	0	0	7SK	7SK RNA [Source:RFAM;Acc:RF00100]	-	-	-
ENSRNOG00000059398	7SK	10[-]4629433-4629761	0.473412	0.19945	0.0747	0.156333	0.675636	0.396809	7SK	7SK RNA [Source:RFAM;Acc:RF00100]	-	-	-
ENSRNOG00000058378	7SK	2[+]83500151-83500401	0	0	0	0	0	0	7SK	7SK RNA [Source:RFAM;Acc:RF00100]	-	-	-
ENSRNOG00000059021	7SK	11[-]46962119-46962386	0	0	0	0	0	0	7SK	7SK RNA [Source:RFAM;Acc:RF00100]	-	-	-
ENSRNOG00000061235	7SK	5[-]455908-456006	0	0	0	0	0	0	7SK	7SK RNA [Source:RFAM;Acc:RF00100]	-	-	-
ENSRNOG00000056755	7SK	17[+]79036022-79036339	0.050326	0.014018	0	0.088537	0.059532	0	7SK	7SK RNA [Source:RFAM;Acc:RF00100]	-	-	-
ENSRNOG00000054060	7SK	1[+]249097545-249097876	0	0	0	0	0	0	7SK	7SK RNA [Source:RFAM;Acc:RF00100]	-	-	-
ENSRNOG00000051845	7SK	19[+]10729313-10729573	0	0	0	0	0	0	7SK	7SK RNA [Source:RFAM;Acc:RF00100]	-	-	-
ENSRNOG00000058948	7SK	16[+]64345234-64345507	0	0	0	0	0	0	7SK	7SK RNA [Source:RFAM;Acc:RF00100]	-	-	-
ENSRNOG00000058947	7SK	8[+]126637070-126637319	0	0	0	0	0	0	7SK	7SK RNA [Source:RFAM;Acc:RF00100]	-	-	-
ENSRNOG00000058499	7SK	2[+]60002221-60002420	0	0	0	0	0	0	7SK	7SK RNA [Source:RFAM;Acc:RF00100]	-	-	-
ENSRNOG00000053570	7SK	4[+]8204279-8204355	0.103666	0	0	0.839296	0.095872	0.307499	7SK	7SK RNA [Source:RFAM;Acc:RF00100]	-	-	-
ENSRNOG00000058230	7SK	2[+]205576815-205577121	0	0	0	0	0	0	7SK	7SK RNA [Source:RFAM;Acc:RF00100]	-	-	-
ENSRNOG00000052261	7SK	7[+]36004945-36005197	0	0	0	0	0	0	7SK	7SK RNA [Source:RFAM;Acc:RF00100]	-	-	-
ENSRNOG00000057299	7SK	10[+]73986012-73986294	0	0	0	0	0	0	7SK	7SK RNA [Source:RFAM;Acc:RF00100]	-	-	-
ENSRNOG00000060313	7SK	7[+]98454626-98454963	0	0	0	0	0	0	7SK	7SK RNA [Source:RFAM;Acc:RF00100]	-	-	-
ENSRNOG00000060314	7SK	9[+]58970310-58970608	0	0	0	0	0	0	7SK	7SK RNA [Source:RFAM;Acc:RF00100]	-	-	-
ENSRNOG00000055419	7SK	11[+]75965043-75965293	0	0	0	0	0	0	7SK	7SK RNA [Source:RFAM;Acc:RF00100]	-	-	-
ENSRNOG00000058045	7SK	4[+]141216821-141217174	0	0	0	0	0	0	7SK	7SK RNA [Source:RFAM;Acc:RF00100]	-	-	-
ENSRNOG00000058043	7SK	14[-]31554767-31555066	0	0	0	0	0	0	7SK	7SK RNA [Source:RFAM;Acc:RF00100]	-	-	-
ENSRNOG00000058868	7SK	18[+]38289288-38289589	0	0	0	0	0	0	7SK	7SK RNA [Source:RFAM;Acc:RF00100]	-	-	-
ENSRNOG00000057006	7SK	13[-]34536434-34536759	0	0	0.054894	0	0	0	7SK	7SK RNA [Source:RFAM;Acc:RF00100]	-	-	-
ENSRNOG00000053066	7SK	15[-]3210291-3210570	0	0	0	0	0	0	7SK	7SK RNA [Source:RFAM;Acc:RF00100]	-	-	-
ENSRNOG00000053909	7SK	20[+]37370160-37370451	0.037471	0	0	0	0	0	7SK	7SK RNA [Source:RFAM;Acc:RF00100]	-	-	-
ENSRNOG00000059104	7SK	1[+]104456796-104457086	0	0	0	0	0	0	7SK	7SK RNA [Source:RFAM;Acc:RF00100]	-	-	-
ENSRNOG00000060809	7SK	9[-]23658534-23658632	0	0	0	0	0	0	7SK	7SK RNA [Source:RFAM;Acc:RF00100]	-	-	-
ENSRNOG00000060800	7SK	4[-]51105134-51105386	0	0	0	0	0	0	7SK	7SK RNA [Source:RFAM;Acc:RF00100]	-	-	-
ENSRNOG00000056165	7SK	2[-]210199170-210199424	0	0	0	0	0	0	7SK	7SK RNA [Source:RFAM;Acc:RF00100]	-	-	-
ENSRNOG00000055134	7SK	13[+]109881241-109881544	0	0	0	0	0	0	7SK	7SK RNA [Source:RFAM;Acc:RF00100]	-	-	-
ENSRNOG00000055132	7SK	6[+]83451984-83452218	0	0	0	0	0	0	7SK	7SK RNA [Source:RFAM;Acc:RF00100]	-	-	-
ENSRNOG00000056568	7SK	X[+]116101823-116102154	0	0	0	0	0	0	7SK	7SK RNA [Source:RFAM;Acc:RF00100]	-	-	-
ENSRNOG00000056567	7SK	1[-]197930460-197930776	0	0	0	0	0	0	7SK	7SK RNA [Source:RFAM;Acc:RF00100]	-	-	-
ENSRNOG00000058346	7SK	17[-]50959560-50959808	0	0	0	0	0	0	7SK	7SK RNA [Source:RFAM;Acc:RF00100]	-	-	-
ENSRNOG00000054456	7SK	15[+]101142701-101143048	0	0	0	0	0	0	7SK	7SK RNA [Source:RFAM;Acc:RF00100]	-	-	-
ENSRNOG00000055492	7SK	6[+]30232743-30233050	0	0	0	0	0	0	7SK	7SK RNA [Source:RFAM;Acc:RF00100]	-	-	-
ENSRNOG00000061722	7SK	4[-]175979502-175979802	0	0	0.118907	0.010541	0	0	7SK	7SK RNA [Source:RFAM;Acc:RF00100]	-	-	-
ENSRNOG00000061725	7SK	1[+]150690345-150690664	0	0	0	0	0	0	7SK	7SK RNA [Source:RFAM;Acc:RF00100]	-	-	-
ENSRNOG00000057864	7SK	2[-]213301860-213302150	0	0	0	0	0	0	7SK	7SK RNA [Source:RFAM;Acc:RF00100]	-	-	-
ENSRNOG00000053375	7SK	6[-]117241343-117241441	0	0	0	0	0	0	7SK	7SK RNA [Source:RFAM;Acc:RF00100]	-	-	-
ENSRNOG00000059617	7SK	10[+]106084577-106084849	0	0	0	0	0	0	7SK	7SK RNA [Source:RFAM;Acc:RF00100]	-	-	-
ENSRNOG00000056936	7SK	2[-]221705965-221706287	0	0	0	0	0	0	7SK	7SK RNA [Source:RFAM;Acc:RF00100]	-	-	-
ENSRNOG00000056935	7SK	13[+]2838446-2838544	0	0	0	0	0	0	7SK	7SK RNA [Source:RFAM;Acc:RF00100]	-	-	-
ENSRNOG00000056932	7SK	1[-]114185999-114186244	0	0	0	0	0	0	7SK	7SK RNA [Source:RFAM;Acc:RF00100]	-	-	-
ENSRNOG00000056099	7SK	18[-]81587985-81588271	0	0	0	0	0	0	7SK	7SK RNA [Source:RFAM;Acc:RF00100]	-	-	-
ENSRNOG00000053604	7SK	8[+]71935844-71936117	0	0	0	0.160288	0.153271	0.41964	7SK	7SK RNA [Source:RFAM;Acc:RF00100]	-	-	-
ENSRNOG00000056877	7SK	8[+]9365276-9365581	0	0	0	0	0	0	7SK	7SK RNA [Source:RFAM;Acc:RF00100]	-	-	-
ENSRNOG00000054566	7SK	19[+]44829894-44829998	0	0	0	0	0	0	7SK	7SK RNA [Source:RFAM;Acc:RF00100]	-	-	-
ENSRNOG00000057154	7SK	1[-]251643570-251643892	0	0	0	0	0	0	7SK	7SK RNA [Source:RFAM;Acc:RF00100]	-	-	-
ENSRNOG00000056998	7SK	3[+]58994456-58994710	0	0	0	0	0	0	7SK	7SK RNA [Source:RFAM;Acc:RF00100]	-	-	-
ENSRNOG00000054153	7SK	X[+]70582967-70583291	0	0	0	0	0	0	7SK	7SK RNA [Source:RFAM;Acc:RF00100]	-	-	-
ENSRNOG00000055203	7SK	15[+]36193671-36193769	0	0	0	0	0	0	7SK	7SK RNA [Source:RFAM;Acc:RF00100]	-	-	-
ENSRNOG00000059925	7SK	1[-]126420033-126420346	0	0	0	0	0	0	7SK	7SK RNA [Source:RFAM;Acc:RF00100]	-	-	-
ENSRNOG00000054317	7SK	3[+]31859213-31859311	0	0	0	0	0	0	7SK	7SK RNA [Source:RFAM;Acc:RF00100]	-	-	-
ENSRNOG00000055045	7SK	1[+]260993610-260993840	0	0	0	0	0	0	7SK	7SK RNA [Source:RFAM;Acc:RF00100]	-	-	-
ENSRNOG00000055903	7SK	7[+]64952092-64952374	0	0	0	0.158141	0	0	7SK	7SK RNA [Source:RFAM;Acc:RF00100]	-	-	-
ENSRNOG00000053525	7SK	2[+]224903566-224903779	0.017286	0	0	0	0	0	7SK	7SK RNA [Source:RFAM;Acc:RF00100]	-	-	-
ENSRNOG00000059719	7SK	10[+]97019484-97019782	0	0	0	0	0	0	7SK	7SK RNA [Source:RFAM;Acc:RF00100]	-	-	-
ENSRNOG00000054299	7SK	2[+]182944236-182944590	0	0	0	0	0	0	7SK	7SK RNA [Source:RFAM;Acc:RF00100]	-	-	-
ENSRNOG00000056354	7SK	2[+]49203696-49203804	0	0	0	0	0	0	7SK	7SK RNA [Source:RFAM;Acc:RF00100]	-	-	-
ENSRNOG00000051761	7SK	9[-]77004588-77004872	0	0	0	0	0	0	7SK	7SK RNA [Source:RFAM;Acc:RF00100]	-	-	-
ENSRNOG00000051491	7SK	4[+]132010546-132010844	0	0	0	0	0	0	7SK	7SK RNA [Source:RFAM;Acc:RF00100]	-	-	-
ENSRNOG00000054482	7SK	17[+]17451743-17451999	0	0	0	0	0	0	7SK	7SK RNA [Source:RFAM;Acc:RF00100]	-	-	-
ENSRNOG00000054738	7SK	4[-]176450487-176450771	0	0	0	0	0	0	7SK	7SK RNA [Source:RFAM;Acc:RF00100]	-	-	-
ENSRNOG00000057611	7SK	X[+]38392525-38392801	0	0	0	0	0	0	7SK	7SK RNA [Source:RFAM;Acc:RF00100]	-	-	-
ENSRNOG00000061919	7SK	6[+]70216415-70216715	0	0	0	0	0	0	7SK	7SK RNA [Source:RFAM;Acc:RF00100]	-	-	-
ENSRNOG00000061915	7SK	18[+]7406964-7407278	0	0	0	0	0	0	7SK	7SK RNA [Source:RFAM;Acc:RF00100]	-	-	-
ENSRNOG00000058031	7SK	1[+]173139486-173139809	0	0	0	0	0	0	7SK	7SK RNA [Source:RFAM;Acc:RF00100]	-	-	-
ENSRNOG00000053911	7SK	20[+]45874483-45874698	0	0	0	0	0	0	7SK	7SK RNA [Source:RFAM;Acc:RF00100]	-	-	-
ENSRNOG00000060792	7SK	6[-]63953793-63954073	0	0	0	0	0	0	7SK	7SK RNA [Source:RFAM;Acc:RF00100]	-	-	-
ENSRNOG00000059076	7SK	11[+]56015559-56015851	0	0	0	0	0	0	7SK	7SK RNA [Source:RFAM;Acc:RF00100]	-	-	-
ENSRNOG00000052576	7SK	2[+]151446178-151446526	0	0	0	0	0	0	7SK	7SK RNA [Source:RFAM;Acc:RF00100]	-	-	-
ENSRNOG00000052575	7SK	6[+]99764734-99764965	0	0	0	0	0	0	7SK	7SK RNA [Source:RFAM;Acc:RF00100]	-	-	-
ENSRNOG00000056986	7SK	1[-]136497804-136498111	0	0	0	0	0	0	7SK	7SK RNA [Source:RFAM;Acc:RF00100]	-	-	-
ENSRNOG00000060409	7SK	9[+]14262525-14262844	0	0	0	0	0	0	7SK	7SK RNA [Source:RFAM;Acc:RF00100]	-	-	-
ENSRNOG00000051895	7SK	X[+]135846441-135846539	0	0	0	0	0	0	7SK	7SK RNA [Source:RFAM;Acc:RF00100]	-	-	-
ENSRNOG00000056534	7SK	5[+]120390135-120390427	0	0	0	0	0	0	7SK	7SK RNA [Source:RFAM;Acc:RF00100]	-	-	-
ENSRNOG00000053345	7SK	7[+]36699193-36699505	0	0	0	0	0	0	7SK	7SK RNA [Source:RFAM;Acc:RF00100]	-	-	-
ENSRNOG00000057974	7SK	20[-]2565244-2565537	0	0	0	0	0	0	7SK	7SK RNA [Source:RFAM;Acc:RF00100]	-	-	-
ENSRNOG00000053990	7SK	8[-]83924457-83924780	0	0	0	0	0	0	7SK	7SK RNA [Source:RFAM;Acc:RF00100]	-	-	-
ENSRNOG00000057695	7SK	2[-]153680792-153681060	0	0	0	0	0	0	7SK	7SK RNA [Source:RFAM;Acc:RF00100]	-	-	-
ENSRNOG00000055874	7SK	10[-]72895461-72895558	0	0	0	0	0	0	7SK	7SK RNA [Source:RFAM;Acc:RF00100]	-	-	-
ENSRNOG00000052996	7SK	13[+]113621611-113621882	0	0	0	0	0	0	7SK	7SK RNA [Source:RFAM;Acc:RF00100]	-	-	-
ENSRNOG00000052633	7SK	17[-]56593230-56593544	0	0	0	0	0	0	7SK	7SK RNA [Source:RFAM;Acc:RF00100]	-	-	-
ENSRNOG00000052638	7SK	9[-]35610450-35610548	0	0	0	0	0	0	7SK	7SK RNA [Source:RFAM;Acc:RF00100]	-	-	-
ENSRNOG00000051497	7SK	4[+]13660046-13660309	0	0	0	0	0	0	7SK	7SK RNA [Source:RFAM;Acc:RF00100]	-	-	-
ENSRNOG00000051386	7SK	X[-]104127440-104127718	0	0	0	0	0	0	7SK	7SK RNA [Source:RFAM;Acc:RF00100]	-	-	-
ENSRNOG00000060855	7SK	5[+]133028734-133028832	0	0	0	0	0	0	7SK	7SK RNA [Source:RFAM;Acc:RF00100]	-	-	-
ENSRNOG00000060854	7SK	8[+]48693597-48693927	0	0	0	0	0	0	7SK	7SK RNA [Source:RFAM;Acc:RF00100]	-	-	-
ENSRNOG00000052435	7SK	20[-]46568708-46568917	0	0	0	0	0	0	7SK	7SK RNA [Source:RFAM;Acc:RF00100]	-	-	-
ENSRNOG00000057842	7SK	8[+]18517447-18517742	0	0	0	0	0	0	7SK	7SK RNA [Source:RFAM;Acc:RF00100]	-	-	-
ENSRNOG00000053176	7SK	13[-]94767389-94767663	0	0	0	0	0	0	7SK	7SK RNA [Source:RFAM;Acc:RF00100]	-	-	-
ENSRNOG00000058108	7SK	2[-]80610579-80610850	0.03042	0	0	0	0	0	7SK	7SK RNA [Source:RFAM;Acc:RF00100]	-	-	-
ENSRNOG00000052697	7SK	1[+]88769417-88769725	0	0	0	0	0.095748	0.009447	7SK	7SK RNA [Source:RFAM;Acc:RF00100]	-	-	-
ENSRNOG00000058319	7SK	18[-]74217929-74218261	0	0	0	0.06118	0	0	7SK	7SK RNA [Source:RFAM;Acc:RF00100]	-	-	-
ENSRNOG00000061435	7SK	2[-]176276071-176276355	0	0	0	0	0	0	7SK	7SK RNA [Source:RFAM;Acc:RF00100]	-	-	-
ENSRNOG00000055549	7SK	20[+]12708955-12709204	0	0	0	0	0	0	7SK	7SK RNA [Source:RFAM;Acc:RF00100]	-	-	-
ENSRNOG00000055548	7SK	10[-]88679165-88679453	0	0	0	0	0	0	7SK	7SK RNA [Source:RFAM;Acc:RF00100]	-	-	-
ENSRNOG00000052019	7SK	1[-]224886844-224887172	0	0	0	0	0	0	7SK	7SK RNA [Source:RFAM;Acc:RF00100]	-	-	-
ENSRNOG00000057793	7SK	4[+]116782888-116783148	0	0	0	0	0	0	7SK	7SK RNA [Source:RFAM;Acc:RF00100]	-	-	-
ENSRNOG00000059420	7SK	1[-]279938505-279938590	0	0	0	0	0	0	7SK	7SK RNA [Source:RFAM;Acc:RF00100]	-	-	-
ENSRNOG00000053519	7SK	13[-]9637873-9638192	0	0	0	0	0	0	7SK	7SK RNA [Source:RFAM;Acc:RF00100]	-	-	-
ENSRNOG00000056824	7SK	19[+]22568560-22568919	0.081121	0	0	0	0	0	7SK	7SK RNA [Source:RFAM;Acc:RF00100]	-	-	-
ENSRNOG00000053568	7SK	4[+]120350077-120350353	0	0	0	0	0	0	7SK	7SK RNA [Source:RFAM;Acc:RF00100]	-	-	-
ENSRNOG00000056361	7SK	12[-]26889610-26889863	0	0	0	0	0	0	7SK	7SK RNA [Source:RFAM;Acc:RF00100]	-	-	-
ENSRNOG00000058630	7SK	6[-]93920626-93920717	0	0	0	0	0	0	7SK	7SK RNA [Source:RFAM;Acc:RF00100]	-	-	-
ENSRNOG00000058638	7SK	2[+]181786255-181786567	0	0	0	0	0	0	7SK	7SK RNA [Source:RFAM;Acc:RF00100]	-	-	-
ENSRNOG00000054982	7SK	3[+]136403878-136404183	0	0	0	0	0	0	7SK	7SK RNA [Source:RFAM;Acc:RF00100]	-	-	-
ENSRNOG00000055478	7SK	2[-]169249123-169249382	0	0	0	0	0	0	7SK	7SK RNA [Source:RFAM;Acc:RF00100]	-	-	-
ENSRNOG00000060043	7SK	8[-]130537010-130537265	0.114077	0	0	0.148727	0.064722	0	7SK	7SK RNA [Source:RFAM;Acc:RF00100]	-	-	-
ENSRNOG00000061802	7SK	1[+]244839387-244839671	0	0	0	0	0	0	7SK	7SK RNA [Source:RFAM;Acc:RF00100]	-	-	-
ENSRNOG00000061808	7SK	6[-]10897031-10897316	0	0	0	0.970421	0.590226	0.424147	7SK	7SK RNA [Source:RFAM;Acc:RF00100]	-	-	-
ENSRNOG00000056671	7SK	6[-]47890471-47890745	0	0	0	0	0	0	7SK	7SK RNA [Source:RFAM;Acc:RF00100]	-	-	-
ENSRNOG00000056282	7SK	10[+]6694301-6694594	0	0	0	0	0	0	7SK	7SK RNA [Source:RFAM;Acc:RF00100]	-	-	-
ENSRNOG00000059958	7SK	5[+]127092119-127092342	0	0	0	0	0	0	7SK	7SK RNA [Source:RFAM;Acc:RF00100]	-	-	-
ENSRNOG00000061926	7SK	2[+]53669197-53669449	0	0	0	0	0	0	7SK	7SK RNA [Source:RFAM;Acc:RF00100]	-	-	-
ENSRNOG00000058391	7SK	5[+]9975072-9975175	0	0	0	0	0	0	7SK	7SK RNA [Source:RFAM;Acc:RF00100]	-	-	-
ENSRNOG00000059040	7SK	10[+]93368812-93368912	0	0	0	0.456334	0	0	7SK	7SK RNA [Source:RFAM;Acc:RF00100]	-	-	-
ENSRNOG00000055017	7SK	1[-]143658199-143658555	0	0	0	0	0	0	7SK	7SK RNA [Source:RFAM;Acc:RF00100]	-	-	-
ENSRNOG00000055013	7SK	13[-]47876606-47876894	0	0	0	0	0	0	7SK	7SK RNA [Source:RFAM;Acc:RF00100]	-	-	-
ENSRNOG00000052090	7SK	3[+]52704574-52704916	0	0	0	0	0	0	7SK	7SK RNA [Source:RFAM;Acc:RF00100]	-	-	-
ENSRNOG00000056732	7SK	18[+]62405838-62406143	0	0	0	0	0	0	7SK	7SK RNA [Source:RFAM;Acc:RF00100]	-	-	-
ENSRNOG00000058928	7SK	16[-]49365716-49365981	0	0	0	0	0	0	7SK	7SK RNA [Source:RFAM;Acc:RF00100]	-	-	-
ENSRNOG00000056155	7SK	2[+]68251817-68252092	0	0	0	0	0	0	7SK	7SK RNA [Source:RFAM;Acc:RF00100]	-	-	-
ENSRNOG00000054241	7SK	X[-]133363653-133363751	0	0	0	0	0	0	7SK	7SK RNA [Source:RFAM;Acc:RF00100]	-	-	-
ENSRNOG00000054240	7SK	X[-]33733844-33734163	0	0	0	0	0	0	7SK	7SK RNA [Source:RFAM;Acc:RF00100]	-	-	-
ENSRNOG00000052974	7SK	4[-]174975340-174975612	0	0	0	0	0	0	7SK	7SK RNA [Source:RFAM;Acc:RF00100]	-	-	-
ENSRNOG00000052970	7SK	2[+]55825572-55825852	0	0	0	0.021988	0.054877	0.080221	7SK	7SK RNA [Source:RFAM;Acc:RF00100]	-	-	-
ENSRNOG00000052355	7SK	7[-]18641020-18641353	0	0	0	0	0	0	7SK	7SK RNA [Source:RFAM;Acc:RF00100]	-	-	-
ENSRNOG00000053752	7SK	17[-]90799609-90799914	0.658406	0.198902	0.130142	0.205083	0.221839	0.031799	7SK	7SK RNA [Source:RFAM;Acc:RF00100]	-	-	-
ENSRNOG00000054908	7SK	6[-]2876356-2876584	0	0	0	0	0.179091	0	7SK	7SK RNA [Source:RFAM;Acc:RF00100]	-	-	-
ENSRNOG00000061067	7SK	3[+]161229281-161229593	0.17292	0.07292	0.283964	1.06971	1.06395	0.646105	7SK	7SK RNA [Source:RFAM;Acc:RF00100]	-	-	-
ENSRNOG00000061065	7SK	14[-]7685714-7686018	0	0	0	0	0	0	7SK	7SK RNA [Source:RFAM;Acc:RF00100]	-	-	-
ENSRNOG00000061060	7SK	3[-]120039477-120039770	0	0	0	0	0	0	7SK	7SK RNA [Source:RFAM;Acc:RF00100]	-	-	-
ENSRNOG00000060332	7SK	3[-]44773994-44774288	0.039466	0.017731	0	0.020152	0.022244	0	7SK	7SK RNA [Source:RFAM;Acc:RF00100]	-	-	-
ENSRNOG00000061887	7SK	9[+]17933065-17933387	0	0	0	0	0	0	7SK	7SK RNA [Source:RFAM;Acc:RF00100]	-	-	-
ENSRNOG00000053253	7SK	1[-]72978028-72978324	0	0	0	0	0	0	7SK	7SK RNA [Source:RFAM;Acc:RF00100]	-	-	-
ENSRNOG00000053254	7SK	20[-]46535573-46535863	0	0	0	0	0	0	7SK	7SK RNA [Source:RFAM;Acc:RF00100]	-	-	-
ENSRNOG00000061503	7SK	5[-]70530687-70530983	0	0	0	0	0	0	7SK	7SK RNA [Source:RFAM;Acc:RF00100]	-	-	-
ENSRNOG00000054786	7SK	2[+]89239134-89239418	0	0	0	0	0	0	7SK	7SK RNA [Source:RFAM;Acc:RF00100]	-	-	-
ENSRNOG00000052835	7SK	X[-]108892258-108892574	0	0	0	0	0	0	7SK	7SK RNA [Source:RFAM;Acc:RF00100]	-	-	-
ENSRNOG00000055785	7SK	X[-]51229372-51229648	0	0	0	0	0	0	7SK	7SK RNA [Source:RFAM;Acc:RF00100]	-	-	-
ENSRNOG00000061749	7SK	18[-]15264768-15265050	0	0	0	0.355816	0.805715	0.672183	7SK	7SK RNA [Source:RFAM;Acc:RF00100]	-	-	-
ENSRNOG00000061745	7SK	3[-]141471413-141471713	0	0	0	0	0	0	7SK	7SK RNA [Source:RFAM;Acc:RF00100]	-	-	-
ENSRNOG00000054627	7SK	17[-]23656183-23656501	0	0	0	0	0	0	7SK	7SK RNA [Source:RFAM;Acc:RF00100]	-	-	-
ENSRNOG00000053049	7SK	2[+]67847576-67847883	0	0	0	0	0	0	7SK	7SK RNA [Source:RFAM;Acc:RF00100]	-	-	-
ENSRNOG00000053046	7SK	19[+]24884027-24884339	0	0	0	0	0	0	7SK	7SK RNA [Source:RFAM;Acc:RF00100]	-	-	-
ENSRNOG00000058749	7SK	9[-]73526186-73526463	0	0	0	0	0	0	7SK	7SK RNA [Source:RFAM;Acc:RF00100]	-	-	-
ENSRNOG00000055115	7SK	5[-]5601589-5601840	0	0	0	0	0	0	7SK	7SK RNA [Source:RFAM;Acc:RF00100]	-	-	-
ENSRNOG00000051947	7SK	6[+]144539524-144539792	0	0	0	0	0	0	7SK	7SK RNA [Source:RFAM;Acc:RF00100]	-	-	-
ENSRNOG00000059829	7SK	10[+]20434382-20434468	0	0	0	0	0	0	7SK	7SK RNA [Source:RFAM;Acc:RF00100]	-	-	-
ENSRNOG00000059823	7SK	2[+]110357274-110357527	0	0	0	0	0	0	7SK	7SK RNA [Source:RFAM;Acc:RF00100]	-	-	-
ENSRNOG00000061581	7SK	X[-]144720075-144720377	0	0	0	0	0	0	7SK	7SK RNA [Source:RFAM;Acc:RF00100]	-	-	-
ENSRNOG00000054470	7SK	1[+]192400702-192400976	0	0	0	0	0	0	7SK	7SK RNA [Source:RFAM;Acc:RF00100]	-	-	-
ENSRNOG00000054862	7SK	18[-]51058043-51058316	0	0	0	0	0	0	7SK	7SK RNA [Source:RFAM;Acc:RF00100]	-	-	-
ENSRNOG00000051663	7SK	5[+]67311748-67312040	0	0	0	0	0	0	7SK	7SK RNA [Source:RFAM;Acc:RF00100]	-	-	-
ENSRNOG00000051668	7SK	20[+]11036910-11037260	0	0	0	0	0	0	7SK	7SK RNA [Source:RFAM;Acc:RF00100]	-	-	-
ENSRNOG00000055969	7SK	6[-]115712209-115712535	0	0	0	0	0	0	7SK	7SK RNA [Source:RFAM;Acc:RF00100]	-	-	-
ENSRNOG00000060209	7SK	13[+]16320218-16320316	0	0	0	0	0	0	7SK	7SK RNA [Source:RFAM;Acc:RF00100]	-	-	-
ENSRNOG00000058469	7SK	5[+]63700908-63701183	0	0	0	0	0	0	7SK	7SK RNA [Source:RFAM;Acc:RF00100]	-	-	-
ENSRNOG00000053788	7SK	20[+]3022073-3022376	0	0	0	0	0	0	7SK	7SK RNA [Source:RFAM;Acc:RF00100]	-	-	-
ENSRNOG00000053782	7SK	5[+]106424643-106424918	0	0	0	0	0	0	7SK	7SK RNA [Source:RFAM;Acc:RF00100]	-	-	-
ENSRNOG00000051786	7SK	4[+]17801305-17801403	0	0	0	0	0	0	7SK	7SK RNA [Source:RFAM;Acc:RF00100]	-	-	-
ENSRNOG00000051783	7SK	3[+]147326039-147326141	0	0	0	0	0	0	7SK	7SK RNA [Source:RFAM;Acc:RF00100]	-	-	-
ENSRNOG00000060900	7SK	X[+]152800981-152801062	0	0	0	0	0	0	7SK	7SK RNA [Source:RFAM;Acc:RF00100]	-	-	-
ENSRNOG00000053416	7SK	2[-]53555773-53555871	0	0	0	0	0	0	7SK	7SK RNA [Source:RFAM;Acc:RF00100]	-	-	-
ENSRNOG00000057373	7SK	13[+]32174738-32174836	0	0	0	0	0	0	7SK	7SK RNA [Source:RFAM;Acc:RF00100]	-	-	-
ENSRNOG00000057379	7SK	X[+]33333968-33334070	0	0	0	0	0	0	7SK	7SK RNA [Source:RFAM;Acc:RF00100]	-	-	-
ENSRNOG00000056103	7SK	X[-]33746701-33746971	0	0	0	0	0	0	7SK	7SK RNA [Source:RFAM;Acc:RF00100]	-	-	-
ENSRNOG00000054337	7SK	10[+]53921196-53921494	0	0	0	0	0	0	7SK	7SK RNA [Source:RFAM;Acc:RF00100]	-	-	-
ENSRNOG00000055069	7SK	X[-]110858327-110858574	0	0	0	0	0	0	7SK	7SK RNA [Source:RFAM;Acc:RF00100]	-	-	-
ENSRNOG00000052042	7SK	3[+]103948384-103948677	0	0	0	0	0	0	7SK	7SK RNA [Source:RFAM;Acc:RF00100]	-	-	-
ENSRNOG00000060289	7SK	X[-]23467547-23467864	1.78814	0.514565	0.625703	0.733609	0.488995	0.107096	7SK	7SK RNA [Source:RFAM;Acc:RF00100]	-	-	-
ENSRNOG00000056113	7SK	1[+]69630339-69630619	0	0	0	0	0	0	7SK	7SK RNA [Source:RFAM;Acc:RF00100]	-	-	-
ENSRNOG00000057894	7SK	15[-]8774477-8774724	0	0	0	0	0	0	7SK	7SK RNA [Source:RFAM;Acc:RF00100]	-	-	-
ENSRNOG00000051700	7SK	X[-]99119299-99119580	0	0	0	0	0	0	7SK	7SK RNA [Source:RFAM;Acc:RF00100]	-	-	-
ENSRNOG00000053355	7SK	7[+]62014290-62014598	0	0	0	0	0	0	7SK	7SK RNA [Source:RFAM;Acc:RF00100]	-	-	-
ENSRNOG00000059283	7SK	14[+]21782929-21783202	0	0	0	0	0	0	7SK	7SK RNA [Source:RFAM;Acc:RF00100]	-	-	-
ENSRNOG00000060092	7SK	9[-]107804349-107804439	0	0	0	0	0	0	7SK	7SK RNA [Source:RFAM;Acc:RF00100]	-	-	-
ENSRNOG00000061873	7SK	18[-]11766583-11766678	0	0	0	0	0	0	7SK	7SK RNA [Source:RFAM;Acc:RF00100]	-	-	-
ENSRNOG00000061875	7SK	5[-]48749281-48749584	0	0	0	0	0.097133	0	7SK	7SK RNA [Source:RFAM;Acc:RF00100]	-	-	-
ENSRNOG00000054752	7SK	15[+]26297615-26297961	0	0	0	0	0	0	7SK	7SK RNA [Source:RFAM;Acc:RF00100]	-	-	-
ENSRNOG00000052752	7SK	10[+]7260839-7261138	0	0	0	0	0	0	7SK	7SK RNA [Source:RFAM;Acc:RF00100]	-	-	-
ENSRNOG00000056182	7SK	5[-]127787449-127787505	0	0	0	0	0.293558	0.079664	7SK	7SK RNA [Source:RFAM;Acc:RF00100]	-	-	-
ENSRNOG00000060113	7SK	2[+]96279593-96279914	0	0	0	0	0	0	7SK	7SK RNA [Source:RFAM;Acc:RF00100]	-	-	-
ENSRNOG00000058874	7SK	7[+]139421055-139421337	0	0	0	0	0	0	7SK	7SK RNA [Source:RFAM;Acc:RF00100]	-	-	-
ENSRNOG00000058878	7SK	11[-]82036597-82036889	0	0	0	0	0	0	7SK	7SK RNA [Source:RFAM;Acc:RF00100]	-	-	-
ENSRNOG00000058879	7SK	19[+]56323235-56323500	0	0	0	0	0	0	7SK	7SK RNA [Source:RFAM;Acc:RF00100]	-	-	-
ENSRNOG00000052656	7SK	11[-]24095514-24095826	0	0	0	0	0	0	7SK	7SK RNA [Source:RFAM;Acc:RF00100]	-	-	-
ENSRNOG00000059354	7SK	2[-]170631620-170631931	0	0	0	0	0	0	7SK	7SK RNA [Source:RFAM;Acc:RF00100]	-	-	-
ENSRNOG00000060368	7SK	5[-]169380739-169381018	0	0	0.076269	0	0	0	7SK	7SK RNA [Source:RFAM;Acc:RF00100]	-	-	-
ENSRNOG00000056613	7SK	14[+]64848277-64848587	0	0	0	0	0	0	7SK	7SK RNA [Source:RFAM;Acc:RF00100]	-	-	-
ENSRNOG00000056618	7SK	20[-]38742334-38742633	0	0	0	0	0	0	7SK	7SK RNA [Source:RFAM;Acc:RF00100]	-	-	-
ENSRNOG00000058168	7SK	9[-]111065835-111066129	0	0	0	0	0	0	7SK	7SK RNA [Source:RFAM;Acc:RF00100]	-	-	-
ENSRNOG00000055819	7SK	6[+]95402730-95403021	0	0	0	0	0	0	7SK	7SK RNA [Source:RFAM;Acc:RF00100]	-	-	-
ENSRNOG00000060199	7SK	X[+]107366105-107366388	0	0	0	0	0	0	7SK	7SK RNA [Source:RFAM;Acc:RF00100]	-	-	-
ENSRNOG00000060191	7SK	12[+]43981717-43982005	0	0	0	0	0	0	7SK	7SK RNA [Source:RFAM;Acc:RF00100]	-	-	-
ENSRNOG00000058555	7SK	8[-]85480292-85480622	2.25223	1.01223	0.795041	0.874209	0.810275	0.10289	7SK	7SK RNA [Source:RFAM;Acc:RF00100]	-	-	-
ENSRNOG00000061451	7SK	X[-]80236547-80236846	0	0	0	0	0	0	7SK	7SK RNA [Source:RFAM;Acc:RF00100]	-	-	-
ENSRNOG00000056921	7SK	8[+]18227871-18228190	0	0	0	0	0	0	7SK	7SK RNA [Source:RFAM;Acc:RF00100]	-	-	-
ENSRNOG00000054655	7SK	9[-]117907791-117908126	0	0	0	0	0	0	7SK	7SK RNA [Source:RFAM;Acc:RF00100]	-	-	-
ENSRNOG00000059470	7SK	16[-]82517236-82517527	0	0	0	0	0	0	7SK	7SK RNA [Source:RFAM;Acc:RF00100]	-	-	-
ENSRNOG00000053074	7SK	9[-]39478711-39479016	0	0	0	0	0	0	7SK	7SK RNA [Source:RFAM;Acc:RF00100]	-	-	-
ENSRNOG00000056000	7SK	X[+]34159310-34159602	0	0	0	0	0	0	7SK	7SK RNA [Source:RFAM;Acc:RF00100]	-	-	-
ENSRNOG00000054927	7SK	10[+]28417664-28417976	0	0	0	0	0	0	7SK	7SK RNA [Source:RFAM;Acc:RF00100]	-	-	-
ENSRNOG00000060875	7SK	1[+]69687340-69687515	0.01604	0	0	0	0	0	7SK	7SK RNA [Source:RFAM;Acc:RF00100]	-	-	-
ENSRNOG00000060873	7SK	12[+]37656803-37657118	0	0	0	0	0	0	7SK	7SK RNA [Source:RFAM;Acc:RF00100]	-	-	-
ENSRNOG00000059196	7SK	4[-]174893905-174894173	0	0	0	0	0	0	7SK	7SK RNA [Source:RFAM;Acc:RF00100]	-	-	-
ENSRNOG00000059193	7SK	13[+]64233674-64233852	0	0	0	0	0	0	7SK	7SK RNA [Source:RFAM;Acc:RF00100]	-	-	-
ENSRNOG00000053573	7SK	17[+]51028971-51029170	0	0	0	0	0	0	7SK	7SK RNA [Source:RFAM;Acc:RF00100]	-	-	-
ENSRNOG00000056698	7SK	10[-]80867957-80868157	0	0	0	0	0	0	7SK	7SK RNA [Source:RFAM;Acc:RF00100]	-	-	-
ENSRNOG00000052805	7SK	13[+]100177978-100178055	0	0	0	0	0	0	7SK	7SK RNA [Source:RFAM;Acc:RF00100]	-	-	-
ENSRNOG00000051406	7SK	18[+]4314467-4314748	0.105975	0	0	0.266476	0.368234	0.555532	7SK	7SK RNA [Source:RFAM;Acc:RF00100]	-	-	-
ENSRNOG00000061084	7SK	9[+]56382380-56382679	0	0	0	0	0	0	7SK	7SK RNA [Source:RFAM;Acc:RF00100]	-	-	-
ENSRNOG00000054143	7SK	15[+]65988128-65988406	0	0	0	0	0	0	7SK	7SK RNA [Source:RFAM;Acc:RF00100]	-	-	-
ENSRNOG00000055897	7SK	4[-]179556166-179556469	0	0	0	0.36914	0	0.234725	7SK	7SK RNA [Source:RFAM;Acc:RF00100]	-	-	-
ENSRNOG00000059935	7SK	18[+]25084048-25084386	0	0	0	0	0	0	7SK	7SK RNA [Source:RFAM;Acc:RF00100]	-	-	-
ENSRNOG00000059689	7SK	13[-]91063047-91063332	0	0	0	0	0	0	7SK	7SK RNA [Source:RFAM;Acc:RF00100]	-	-	-
ENSRNOG00000059682	7SK	1[+]216907688-216907752	0	0	0	0	0	0	7SK	7SK RNA [Source:RFAM;Acc:RF00100]	-	-	-
ENSRNOG00000060768	7SK	7[+]5602173-5602436	0	0	0	0	0	0	7SK	7SK RNA [Source:RFAM;Acc:RF00100]	-	-	-
ENSRNOG00000057698	7SK	5[+]152601389-152601669	0	0	0	0	0	0	7SK	7SK RNA [Source:RFAM;Acc:RF00100]	-	-	-
ENSRNOG00000052073	7SK	9[+]108838677-108838980	0	0	0	0	0	0	7SK	7SK RNA [Source:RFAM;Acc:RF00100]	-	-	-
ENSRNOG00000053678	7SK	5[+]47735737-47736012	0	0	0	0	0	0	7SK	7SK RNA [Source:RFAM;Acc:RF00100]	-	-	-
ENSRNOG00000057608	7SK	17[-]90659344-90659637	0	0	0	0	0	0	7SK	7SK RNA [Source:RFAM;Acc:RF00100]	-	-	-
ENSRNOG00000051806	7SK	9[+]16017689-16017935	0	0	0	0	0	0	7SK	7SK RNA [Source:RFAM;Acc:RF00100]	-	-	-
ENSRNOG00000058985	7SK	13[+]109802204-109802507	0	0	0	0	0	0	7SK	7SK RNA [Source:RFAM;Acc:RF00100]	-	-	-
ENSRNOG00000059760	7SK	6[+]57819682-57820007	0	0	0	0	0	0	7SK	7SK RNA [Source:RFAM;Acc:RF00100]	-	-	-
ENSRNOG00000056143	7SK	3[+]105751120-105751432	0	0	0	0	0	0	7SK	7SK RNA [Source:RFAM;Acc:RF00100]	-	-	-
ENSRNOG00000053734	7SK	8[+]75468901-75469214	0	0	0	0	0	0	7SK	7SK RNA [Source:RFAM;Acc:RF00100]	-	-	-
ENSRNOG00000061829	7SK	6[-]95871665-95871980	0	0	0	0	0	0	7SK	7SK RNA [Source:RFAM;Acc:RF00100]	-	-	-
ENSRNOG00000061823	7SK	16[+]18197688-18197937	0	0	0	0	0	0	7SK	7SK RNA [Source:RFAM;Acc:RF00100]	-	-	-
ENSRNOG00000061825	7SK	7[-]120929660-120929964	0	0.017149	0	0	0	0	7SK	7SK RNA [Source:RFAM;Acc:RF00100]	-	-	-
ENSRNOG00000058573	7SK	12[+]2706968-2707255	0	0	0	0	0	0	7SK	7SK RNA [Source:RFAM;Acc:RF00100]	-	-	-
ENSRNOG00000061908	7SK	1[+]190338092-190338384	0	0	0	0.247353	0	0	7SK	7SK RNA [Source:RFAM;Acc:RF00100]	-	-	-
ENSRNOG00000051525	7SK	7[+]37366348-37366589	0	0	0	0	0	0	7SK	7SK RNA [Source:RFAM;Acc:RF00100]	-	-	-
ENSRNOG00000051526	7SK	6[+]67112851-67113146	0	0	0	0	0	0	7SK	7SK RNA [Source:RFAM;Acc:RF00100]	-	-	-
ENSRNOG00000061278	7SK	10[+]57895725-57895967	0	0	0	0	0	0	7SK	7SK RNA [Source:RFAM;Acc:RF00100]	-	-	-
ENSRNOG00000058826	7SK	1[-]270022289-270022584	0	0	0	0	0	0	7SK	7SK RNA [Source:RFAM;Acc:RF00100]	-	-	-
ENSRNOG00000055039	7SK	15[+]41809571-41809861	0	0	0	0	0	0	7SK	7SK RNA [Source:RFAM;Acc:RF00100]	-	-	-
ENSRNOG00000057041	7SK	1[+]136805483-136805785	0	0	0	0	0	0	7SK	7SK RNA [Source:RFAM;Acc:RF00100]	-	-	-
ENSRNOG00000055376	7SK	12[-]37762944-37763179	0	0	0	0	0	0	7SK	7SK RNA [Source:RFAM;Acc:RF00100]	-	-	-
ENSRNOG00000051887	7SK	7[-]3872617-3872912	0	0	0	0	0	0	7SK	7SK RNA [Source:RFAM;Acc:RF00100]	-	-	-
ENSRNOG00000058274	7SK	4[+]121506732-121506984	0	0	0	0	0	0	7SK	7SK RNA [Source:RFAM;Acc:RF00100]	-	-	-
ENSRNOG00000054261	7SK	4[+]17910526-17910622	0	0	0	0	0	0	7SK	7SK RNA [Source:RFAM;Acc:RF00100]	-	-	-
ENSRNOG00000054598	7SK	2[-]260837220-260837512	0	0	0	0	0	0	7SK	7SK RNA [Source:RFAM;Acc:RF00100]	-	-	-
ENSRNOG00000052337	7SK	20[-]27308833-27309155	0	0	0	0	0	0	7SK	7SK RNA [Source:RFAM;Acc:RF00100]	-	-	-
ENSRNOG00000060357	7SK	5[-]4705358-4705609	0	0	0	0	0	0	7SK	7SK RNA [Source:RFAM;Acc:RF00100]	-	-	-
ENSRNOG00000051926	7SK	14[+]43500149-43500463	0.278129	0	0	0.137834	0	0.005148	7SK	7SK RNA [Source:RFAM;Acc:RF00100]	-	-	-
ENSRNOG00000054021	7SK	X[+]83121448-83121729	0	0	0	0	0	0	7SK	7SK RNA [Source:RFAM;Acc:RF00100]	-	-	-
ENSRNOG00000056229	7SK	20[+]2611090-2611392	0	0	0	0	0	0	7SK	7SK RNA [Source:RFAM;Acc:RF00100]	-	-	-
ENSRNOG00000052105	7SK	X[+]131743018-131743334	0	0	0	0	0	0	7SK	7SK RNA [Source:RFAM;Acc:RF00100]	-	-	-
ENSRNOG00000059353	7SK	18[-]33982147-33982428	0	0	0	0	0	0	7SK	7SK RNA [Source:RFAM;Acc:RF00100]	-	-	-
ENSRNOG00000053335	7SK	4[-]46079582-46079877	0	0	0	0	0	0	7SK	7SK RNA [Source:RFAM;Acc:RF00100]	-	-	-
ENSRNOG00000056975	7SK	X[+]21025921-21026228	0	0	0	0	0	0	7SK	7SK RNA [Source:RFAM;Acc:RF00100]	-	-	-
ENSRNOG00000052608	7SK	20[+]8024430-8024719	0	0	0	0	0	0	7SK	7SK RNA [Source:RFAM;Acc:RF00100]	-	-	-
ENSRNOG00000057723	7SK	5[-]86556357-86556674	0	0	0	0	0	0	7SK	7SK RNA [Source:RFAM;Acc:RF00100]	-	-	-
ENSRNOG00000059147	7SK	20[+]66366-66465	0	0	0	0	0	0	7SK	7SK RNA [Source:RFAM;Acc:RF00100]	-	-	-
ENSRNOG00000059141	7SK	5[+]33274274-33274545	0	0	0	0	0	0	7SK	7SK RNA [Source:RFAM;Acc:RF00100]	-	-	-
ENSRNOG00000060261	7SK	4[-]176170283-176170542	0.017971	0	0	1.03278	0.228404	0.34306	7SK	7SK RNA [Source:RFAM;Acc:RF00100]	-	-	-
ENSRNOG00000053027	7SK	2[-]213451227-213451517	0	0	0	0	0	0	7SK	7SK RNA [Source:RFAM;Acc:RF00100]	-	-	-
ENSRNOG00000057255	7SK	18[-]7640754-7641070	0	0	0	0	0	0	7SK	7SK RNA [Source:RFAM;Acc:RF00100]	-	-	-
ENSRNOG00000057878	7SK	12[-]2299725-2300061	0	0	0	0	0	0	7SK	7SK RNA [Source:RFAM;Acc:RF00100]	-	-	-
ENSRNOG00000061309	7SK	17[+]63251735-63252022	0	0	0	0	0	0	7SK	7SK RNA [Source:RFAM;Acc:RF00100]	-	-	-
ENSRNOG00000060651	7SK	6[-]34347891-34348173	0	0	0	0	0	0	7SK	7SK RNA [Source:RFAM;Acc:RF00100]	-	-	-
ENSRNOG00000054807	7SK	1[-]141076246-141076496	0.088425	0	0	0.131731	0	0.24423	7SK	7SK RNA [Source:RFAM;Acc:RF00100]	-	-	-
ENSRNOG00000057991	7SK	2[-]203106270-203106557	0	0	0	0	0	0	7SK	7SK RNA [Source:RFAM;Acc:RF00100]	-	-	-
ENSRNOG00000054110	7SK	17[+]82189535-82189829	0	0	0	0	0	0.001374	7SK	7SK RNA [Source:RFAM;Acc:RF00100]	-	-	-
ENSRNOG00000057386	7SK	5[+]170919636-170919940	0	0	0	0	0	0	7SK	7SK RNA [Source:RFAM;Acc:RF00100]	-	-	-
ENSRNOG00000056262	7SK	10[+]96048131-96048364	0	0	0	0	0	0	7SK	7SK RNA [Source:RFAM;Acc:RF00100]	-	-	-
ENSRNOG00000058301	7SK	1[+]246926595-246926915	0.246305	0.031663	0	0.057016	0.059486	0	7SK	7SK RNA [Source:RFAM;Acc:RF00100]	-	-	-
ENSRNOG00000059651	7SK	4[-]139165424-139165742	0.420813	0.204771	0.124838	0.196726	0.212799	0.030503	7SK	7SK RNA [Source:RFAM;Acc:RF00100]	-	-	-
ENSRNOG00000051649	7SK	11[+]29660042-29660140	0	0	0	0	0	0	7SK	7SK RNA [Source:RFAM;Acc:RF00100]	-	-	-
ENSRNOG00000055947	7SK	2[-]205485076-205485398	0.318015	0.170768	0.101131	0.122426	0.136317	0.030125	7SK	7SK RNA [Source:RFAM;Acc:RF00100]	-	-	-
ENSRNOG00000055173	7SK	15[-]35649433-35649531	0	0	0	0	0	0	7SK	7SK RNA [Source:RFAM;Acc:RF00100]	-	-	-
ENSRNOG00000059751	7SK	10[-]24937950-24938260	0	0	0	0	0	0	7SK	7SK RNA [Source:RFAM;Acc:RF00100]	-	-	-
ENSRNOG00000060109	7SK	5[-]135784738-135784969	0	0	0	0	0	0	7SK	7SK RNA [Source:RFAM;Acc:RF00100]	-	-	-
ENSRNOG00000058640	7SK	1[+]184495487-184495769	0	0	0	0	0	0	7SK	7SK RNA [Source:RFAM;Acc:RF00100]	-	-	-
ENSRNOG00000053853	7SK	1[-]235253959-235254290	0	0	0	0	0	0	7SK	7SK RNA [Source:RFAM;Acc:RF00100]	-	-	-
ENSRNOG00000057192	7SK	18[+]81671954-81672273	0	0	0	0	0	0	7SK	7SK RNA [Source:RFAM;Acc:RF00100]	-	-	-
ENSRNOG00000057193	7SK	18[+]2103436-2103704	0	0	0	0	0	0	7SK	7SK RNA [Source:RFAM;Acc:RF00100]	-	-	-
ENSRNOG00000059596	7SK	7[-]97676331-97676618	0.085177	0	0	0	0	0	7SK	7SK RNA [Source:RFAM;Acc:RF00100]	-	-	-
ENSRNOG00000060969	7SK	1[-]90304038-90304311	0	0	0	0	0	0	7SK	7SK RNA [Source:RFAM;Acc:RF00100]	-	-	-
ENSRNOG00000060380	7SK	9[+]104363750-104364062	0	0	0	0	0	0	7SK	7SK RNA [Source:RFAM;Acc:RF00100]	-	-	-
ENSRNOG00000057265	7SK	2[-]33531716-33531995	0	0	0	0	0	0	7SK	7SK RNA [Source:RFAM;Acc:RF00100]	-	-	-
ENSRNOG00000056291	7SK	18[+]34128181-34128329	0	0	0	0	0	0	7SK	7SK RNA [Source:RFAM;Acc:RF00100]	-	-	-
ENSRNOG00000059038	7SK	14[-]50805260-50805358	0	0	0	0	0	0	7SK	7SK RNA [Source:RFAM;Acc:RF00100]	-	-	-
ENSRNOG00000059031	7SK	3[+]34622466-34622763	0	0	0	0	0	0	7SK	7SK RNA [Source:RFAM;Acc:RF00100]	-	-	-
ENSRNOG00000061222	7SK	4[+]176412391-176412475	0	0	0	0	0	0	7SK	7SK RNA [Source:RFAM;Acc:RF00100]	-	-	-
ENSRNOG00000061228	7SK	20[+]10898375-10898657	0	0	0	0	0	0	7SK	7SK RNA [Source:RFAM;Acc:RF00100]	-	-	-
ENSRNOG00000058817	7SK	8[+]115337852-115338134	0	0	0	0.001416	0	0	7SK	7SK RNA [Source:RFAM;Acc:RF00100]	-	-	-
ENSRNOG00000058814	7SK	2[+]109632917-109633196	0	0	0	0	0	0	7SK	7SK RNA [Source:RFAM;Acc:RF00100]	-	-	-
ENSRNOG00000054997	7SK	10[-]21386787-21387030	0	0	0	0	0	0	7SK	7SK RNA [Source:RFAM;Acc:RF00100]	-	-	-
ENSRNOG00000060515	7SK	9[+]66441599-66441930	0	0	0	0	0	0	7SK	7SK RNA [Source:RFAM;Acc:RF00100]	-	-	-
ENSRNOG00000058228	7SK	2[-]205880175-205880466	0	0	0	0	0	0	7SK	7SK RNA [Source:RFAM;Acc:RF00100]	-	-	-
ENSRNOG00000054252	7SK	5[-]113399577-113399906	0	0	0	0	0	0	7SK	7SK RNA [Source:RFAM;Acc:RF00100]	-	-	-
ENSRNOG00000055610	7SK	4[+]179966424-179966524	0	0	0	0	0	0	7SK	7SK RNA [Source:RFAM;Acc:RF00100]	-	-	-
ENSRNOG00000057448	7SK	7[-]3869892-3870194	0	0	0	0	0	0	7SK	7SK RNA [Source:RFAM;Acc:RF00100]	-	-	-
ENSRNOG00000061076	7SK	20[+]19411369-19411691	0	0	0	0	0	0	7SK	7SK RNA [Source:RFAM;Acc:RF00100]	-	-	-
ENSRNOG00000061892	7SK	11[+]64748504-64748696	0	0	0	0	0	0.500807	7SK	7SK RNA [Source:RFAM;Acc:RF00100]	-	-	-
ENSRNOG00000059899	7SK	10[+]94963633-94963909	0	0	0	0	0	0	7SK	7SK RNA [Source:RFAM;Acc:RF00100]	-	-	-
ENSRNOG00000061535	7SK	2[-]176306028-176306312	0	0	0	0	0	0	7SK	7SK RNA [Source:RFAM;Acc:RF00100]	-	-	-
ENSRNOG00000054779	7SK	10[-]38811597-38811817	0	0	0	0	0	0	7SK	7SK RNA [Source:RFAM;Acc:RF00100]	-	-	-
ENSRNOG00000055427	7SK	16[+]70579507-70579720	0	0	0	0	0	0	7SK	7SK RNA [Source:RFAM;Acc:RF00100]	-	-	-
ENSRNOG00000058070	7SK	2[-]26129398-26129671	0	0	0	0	0	0	7SK	7SK RNA [Source:RFAM;Acc:RF00100]	-	-	-
ENSRNOG00000059301	7SK	6[-]137104850-137105120	0	0	0	0	0	0	7SK	7SK RNA [Source:RFAM;Acc:RF00100]	-	-	-
ENSRNOG00000059306	7SK	2[+]177560728-177561030	0	0	0	0	0	0	7SK	7SK RNA [Source:RFAM;Acc:RF00100]	-	-	-
ENSRNOG00000058534	7SK	2[+]250960630-250960853	0	0	0	0	0	0	7SK	7SK RNA [Source:RFAM;Acc:RF00100]	-	-	-
ENSRNOG00000056949	7SK	1[+]75450297-75450635	0	0	0	0	0	0	7SK	7SK RNA [Source:RFAM;Acc:RF00100]	-	-	-
ENSRNOG00000057019	7SK	19[-]20431724-20432021	0	0	0	0	0	0	7SK	7SK RNA [Source:RFAM;Acc:RF00100]	-	-	-
ENSRNOG00000057015	7SK	9[-]56136966-56137250	0	0	0	0	0	0	7SK	7SK RNA [Source:RFAM;Acc:RF00100]	-	-	-
ENSRNOG00000059172	7SK	5[+]162021796-162021851	0	0	0	0	0	0	7SK	7SK RNA [Source:RFAM;Acc:RF00100]	-	-	-
ENSRNOG00000061140	7SK	16[-]37035077-37035410	0	0	0	0	0	0	7SK	7SK RNA [Source:RFAM;Acc:RF00100]	-	-	-
ENSRNOG00000061148	7SK	1[+]75662734-75662982	0	0	0	0	0	0	7SK	7SK RNA [Source:RFAM;Acc:RF00100]	-	-	-
ENSRNOG00000060819	7SK	13[-]2964669-2964930	0	0	0	0	0	0	7SK	7SK RNA [Source:RFAM;Acc:RF00100]	-	-	-
ENSRNOG00000055697	7SK	4[+]34460281-34460608	0	0	0	0	0	0	7SK	7SK RNA [Source:RFAM;Acc:RF00100]	-	-	-
ENSRNOG00000052470	7SK	14[-]49606096-49606194	0	0	0	0	0	0	7SK	7SK RNA [Source:RFAM;Acc:RF00100]	-	-	-
ENSRNOG00000051959	7SK	18[+]34224678-34224826	0	0	0	0	0	0	7SK	7SK RNA [Source:RFAM;Acc:RF00100]	-	-	-
ENSRNOG00000056622	7SK	7[+]15854117-15854413	0	0	0	0.660658	0.178961	0.635045	7SK	7SK RNA [Source:RFAM;Acc:RF00100]	-	-	-
ENSRNOG00000058145	7SK	1[-]84797290-84797629	0	0	0	0	0	0	7SK	7SK RNA [Source:RFAM;Acc:RF00100]	-	-	-
ENSRNOG00000054448	7SK	1[+]92720803-92721085	0	0	0	0	0	0	7SK	7SK RNA [Source:RFAM;Acc:RF00100]	-	-	-
ENSRNOG00000057521	7SK	8[-]62185513-62185806	0	0	0	0	0	0	7SK	7SK RNA [Source:RFAM;Acc:RF00100]	-	-	-
ENSRNOG00000054120	7SK	18[-]17811366-17811659	0	0	0	0	0	0	7SK	7SK RNA [Source:RFAM;Acc:RF00100]	-	-	-
ENSRNOG00000054880	7SK	5[+]71411798-71412113	0	0	0	0	0	0	7SK	7SK RNA [Source:RFAM;Acc:RF00100]	-	-	-
ENSRNOG00000056081	7SK	18[-]8703177-8703429	0	0	0	0	0	0	7SK	7SK RNA [Source:RFAM;Acc:RF00100]	-	-	-
ENSRNOG00000052483	7SK	5[-]128800301-128800560	0	0	0	0	0	0	7SK	7SK RNA [Source:RFAM;Acc:RF00100]	-	-	-
ENSRNOG00000058473	7SK	7[-]132801617-132801908	0	0	0	0	0	0	7SK	7SK RNA [Source:RFAM;Acc:RF00100]	-	-	-
ENSRNOG00000046924	9430069I07Rik	7[-]73123853-73130740	0	0	0	0	0	0	9430069I07Rik	RIKEN cDNA 9430069I07 gene [Source:MGI Symbol;Acc:MGI:1924608]	-	-	-
ENSRNOG00000004692	A1bg	7[-]102294797-102298522	2.18098	3.07141	0.591899	0.786779	0.56074	0.777332	A1bg	alpha-1-B glycoprotein [Source:RGD Symbol;Acc:69417]	GO:0005576;GO:0003674;GO:0008150	-	-
ENSRNOG00000033195	A1cf	1[+]250426158-250514866	8.52196	11.6741	8.41417	23.9033	17.2369	39.8332	A1cf	APOBEC1 complementation factor [Source:RGD Symbol;Acc:619834]	GO:0003676;GO:0003727;GO:0007566;GO:0010609;GO:0016554;GO:0016556;GO:0005634;GO:0005654;GO:0005737;GO:0030895	-	KOG0117-Heterogeneous nuclear ribonucleoprotein R (RRM superfamily)[A]
ENSRNOG00000038520	A26c2	17[-]66657755-66667853	0	0	0	0	0	0	A26c2	ANKRD26-like family C, member 2 [Source:MGI Symbol;Acc:MGI:3644757]	-	-	-
ENSRNOG00000028896	A2m	4[+]154309426-154359137	0.523614	0.175473	0.444374	0.442838	0.340331	0.597111	A2m	alpha-2-macroglobulin [Source:RGD Symbol;Acc:2004]	GO:0010466;GO:0030414;GO:0004866;GO:0051384;GO:0005615;GO:0007584;GO:0002438;GO:0005576;GO:0042803;GO:0009611;GO:0006953;GO:0001553;GO:0004867;GO:0051289;GO:0034695;GO:0048403;GO:0048406;GO:0010037;GO:0010951;GO:1990402	K03910-ko04610 Complement and coagulation cascades	-
ENSRNOG00000007247	A2ml1	4[-]161866078-161907767	0.013344	0.032591	0.03031	0.714854	1.26388	0.671491	A2ml1	alpha-2-macroglobulin-like 1 [Source:RGD Symbol;Acc:1565709]	GO:0004866;GO:0005615;GO:0010951;GO:0005576	-	KOG1366-Alpha-macroglobulin[O]
ENSRNOG00000005935	A3galt2	5[+]146933592-146945880	0.337675	0.363152	0.322912	0.25648	0.356023	0.356611	A3galt2	alpha 1,3-galactosyltransferase 2 [Source:RGD Symbol;Acc:727913]	GO:0005794;GO:0016757;GO:0016758;GO:0005975;GO:0046872;GO:0016740;GO:0016020;GO:0016021;GO:0032580;GO:0031982;GO:0001962;GO:0047276;GO:0006688;GO:0030259	-	-
ENSRNOG00000009736	A4galt	7[-]124085834-124089385	0	0	0	0	0	0	A4galt	alpha 1,4-galactosyltransferase [Source:RGD Symbol;Acc:621583]	GO:0000139;GO:0005794;GO:0016757;GO:0006629;GO:0016740;GO:0016021;GO:0016020;GO:0006486;GO:0008378;GO:0015643;GO:0050512;GO:0001576;GO:0007009;GO:0070062	K01988-ko00603 Glycosphingolipid biosynthesis - globo series	KOG1928-Alpha-1,4-N-acetylglucosaminyltransferase[G]
ENSRNOG00000042649	A4gnt	8[+]107859366-107865789	0	0	0	0	0	0	A4gnt	alpha-1,4-N-acetylglucosaminyltransferase [Source:RGD Symbol;Acc:1590210]	GO:0005575;GO:0008150;GO:0003674;GO:0008375;GO:0006493;GO:0009101;GO:0050680	-	KOG1928-Alpha-1,4-N-acetylglucosaminyltransferase[G]
ENSRNOG00000050955	A630010A05Rik	10[+]1920529-1952605	0	0	0	0.963802	0.319737	0.461277	A630010A05Rik	RIKEN cDNA A630010A05 gene [Source:MGI Symbol;Acc:MGI:3584518]	-	-	-
ENSRNOG00000058991	A830031A19Rik	14[-]108798823-108799128	0	0	0	0	0	0	A830031A19Rik	RIKEN cDNA A830031A19 gene [Source:MGI Symbol;Acc:MGI:2685508]	-	-	-
ENSRNOG00000038119	A930003A15Rik	11[+]84827062-84833286	0	0	0	0	0	0	A930003A15Rik	RIKEN cDNA A930003A15 gene [Source:MGI Symbol;Acc:MGI:1915412]	-	-	-
ENSRNOG00000057981	A930009A15Rik	7[+]58570579-58580844	0	0	0	0	0	0	A930009A15Rik	RIKEN cDNA A930009A15 gene [Source:MGI Symbol;Acc:MGI:1925048]	-	-	-
ENSRNOG00000042516	A930018M24Rik	15[-]27818627-27819376	0	0	0	0	0	0	A930018M24Rik	RIKEN cDNA A930018M24 gene [Source:MGI Symbol;Acc:MGI:2686053]	-	-	KOG1072-FOG: Kelch repeat[R]
ENSRNOG00000000478	AA926063	20[-]5486474-5499010	0.882161	1.17826	0.677076	0.563724	0.894584	0.372984	AA926063	AA926063gene [Source:RGD Symbol;Acc:1303072]	-	-	-
ENSRNOG00000013445	Aaas	7[-]143937199-143956668	4.781	4.37907	4.34651	4.21788	3.37546	3.89854	Aaas	aladin WD repeat nucleoporin [Source:RGD Symbol;Acc:1308701]	GO:0005575;GO:0008150;GO:0003674;GO:0006913;GO:0007612;GO:0009566;GO:0005634;GO:0005643;GO:0005654;GO:0005813;GO:0005829;GO:0016020;GO:0031965	K14320-ko03013 RNA transport	KOG2139-WD40 repeat protein[R]
ENSRNOG00000047964	AABR07000089.1	1[+]699413-708065	0	0	0	0	0	0	AABR07000089.1	-	GO:0007186;GO:0004930;GO:0007165;GO:0004871;GO:0016021;GO:0005886;GO:0016020	-	KOG1056-Glutamate-gated metabotropic ion channel receptor subunit GRM2 and related subunits, G-protein coupled receptor superfamily[PT]
ENSRNOG00000050129	AABR07000137.1	1[-]1390128-1392329	0	0	0	0	0	0	AABR07000137.1	-	GO:0005886;GO:0003823;GO:0046703;GO:0001913;GO:0019882;GO:0042267	-	-
ENSRNOG00000040316	AABR07000145.1	1[-]1439099-1442186	0	0	0	0	0	0	AABR07000145.1	-	-	-	-
ENSRNOG00000029897	AABR07000156.1	1[+]1545134-1546169	0.050928	0.145955	0.107558	0.180004	0.190966	0.244837	AABR07000156.1	-	GO:0016021;GO:0016887;GO:0016020;GO:0006812	-	-
ENSRNOG00000051899	AABR07000159.1	1[-]1726382-1726514	0	0	0	0	0.238054	0	AABR07000159.1	-	-	-	-
ENSRNOG00000053710	AABR07000159.2	1[-]1888877-1889236	0	0	0	0	0	0	AABR07000159.2	-	GO:0022627;GO:0003735;GO:0005840;GO:0006412;GO:0015935	-	-
ENSRNOG00000055508	AABR07000159.3	1[+]1885876-1886209	0	0	0	0.107995	0.043713	0.187423	AABR07000159.3	-	-	-	-
ENSRNOG00000055877	AABR07000159.4	1[-]1669086-1669361	0	0	0	0	0	0	AABR07000159.4	-	-	-	-
ENSRNOG00000059137	AABR07000173.1	1[-]2750892-2762394	0	0	0	0	0	0	AABR07000173.1	-	-	-	-
ENSRNOG00000053182	AABR07000200.1	1[-]4328345-4356492	0	0	0	0	0	0	AABR07000200.1	-	-	-	-
ENSRNOG00000041566	AABR07000220.1	1[-]5168027-5168116	0	0	0	0	0	0	AABR07000220.1	-	-	-	-
ENSRNOG00000014431	AABR07000222.1	1[-]5238340-5238900	1.5492	1.35403	1.12987	2.02987	1.51839	1.19093	AABR07000222.1	-	-	-	-
ENSRNOG00000051844	AABR07000248.1	1[-]6278881-6279793	0	0	0	0	0	0	AABR07000248.1	-	-	-	-
ENSRNOG00000036310	AABR07000257.1	1[+]7171507-7171614	0	0	0	0	0	0	AABR07000257.1	-	-	-	-
ENSRNOG00000043188	AABR07000261.1	1[+]7305658-7313200	0	0	0	0	0	0	AABR07000261.1	-	-	-	-
ENSRNOG00000016624	AABR07000276.1	1[-]7800941-7801438	0	0	0	0	0	0	AABR07000276.1	-	GO:0003779;GO:0005622;GO:0015629;GO:0030042	-	KOG1735-Actin depolymerizing factor[Z]
ENSRNOG00000059032	AABR07000325.1	1[+]9848303-9849453	0	0	0	0	0	0	AABR07000325.1	-	-	-	-
ENSRNOG00000047798	AABR07000332.1	1[-]10206594-10206692	0	0	0	0	0	0	AABR07000332.1	-	-	-	-
ENSRNOG00000059769	AABR07000356.1	1[+]10775639-10775765	0	0	0	0	0	0	AABR07000356.1	-	-	-	-
ENSRNOG00000060990	AABR07000382.1	1[+]11766992-11772215	1.53082	1.21815	1.44406	1.40226	1.9392	1.58228	AABR07000382.1	-	-	-	-
ENSRNOG00000055421	AABR07000385.1	1[+]11873206-11873466	0	0	0	0	0	0	AABR07000385.1	-	GO:0016021;GO:0016020	-	-
ENSRNOG00000058425	AABR07000385.2	1[-]11834038-11840581	0.08637	0.046551	0.054773	0.098795	0.08476	0.143519	AABR07000385.2	-	-	-	-
ENSRNOG00000047746	AABR07000398.1	1[+]11963836-11968939	16.8254	8.92374	11.6323	4.12146	6.85162	3.24588	AABR07000398.1	-	-	-	-
ENSRNOG00000055836	AABR07000402.1	1[+]11974142-11974190	1.56603	0.519291	0.661523	0.343356	0.574166	0.740208	AABR07000402.1	-	-	-	-
ENSRNOG00000060657	AABR07000404.1	1[+]11975022-11975070	0.923589	0.30386	0.312014	0.280137	0.348852	0.260968	AABR07000404.1	-	-	-	-
ENSRNOG00000055789	AABR07000411.1	1[+]12006598-12136637	0.03497	0.051331	0	0.044087	0	0.050855	AABR07000411.1	-	-	-	-
ENSRNOG00000055660	AABR07000433.1	1[+]12400648-12410192	0	0	0	0	0	0.040475	AABR07000433.1	-	-	-	-
ENSRNOG00000060284	AABR07000436.1	1[-]12483436-12485729	0	0	0	0	0	0	AABR07000436.1	-	-	-	-
ENSRNOG00000053331	AABR07000451.1	1[+]13351242-13354315	0	0	0	0	0	0.092515	AABR07000451.1	-	-	-	-
ENSRNOG00000052189	AABR07000452.1	1[-]13344901-13382067	0.132944	0	0	0	0.111754	0	AABR07000452.1	-	-	-	-
ENSRNOG00000053184	AABR07000458.1	1[+]13723249-13723349	0	0	0	0	0	0	AABR07000458.1	-	-	-	-
ENSRNOG00000054373	AABR07000484.1	1[+]14527716-14549472	0	0	0	0	0	0	AABR07000484.1	-	-	-	-
ENSRNOG00000053291	AABR07000493.1	1[+]14938230-14950781	0	0	0.017597	0	0	0	AABR07000493.1	-	-	-	-
ENSRNOG00000053617	AABR07000523.1	1[+]16449176-16463107	0	0	0	0	0	0	AABR07000523.1	-	-	-	-
ENSRNOG00000052464	AABR07000533.1	1[-]16958481-16967945	0	0	0	0	0	0	AABR07000533.1	-	-	-	-
ENSRNOG00000048762	AABR07000534.1	1[-]16987382-16989482	0	0	0	0	0	0	AABR07000534.1	-	-	-	-
ENSRNOG00000055971	AABR07000544.1	1[+]17432106-17432481	0	0	0	0	0	0	AABR07000544.1	-	-	-	-
ENSRNOG00000047754	AABR07000574.1	1[-]18086052-18086154	0	0	0	0	0	0	AABR07000574.1	-	-	-	-
ENSRNOG00000028519	AABR07000581.1	1[+]18353812-18354534	0	0	0	0	0	0	AABR07000581.1	-	GO:0005085;GO:0007264;GO:0005622;GO:0043547	-	KOG3629-Guanine-nucleotide releasing factor[T]
ENSRNOG00000046438	AABR07000583.1	1[-]18511024-18511695	0	0	0	0	0	0	AABR07000583.1	-	GO:0005085;GO:0007264;GO:0005622;GO:0043547	-	KOG3629-Guanine-nucleotide releasing factor[T]
ENSRNOG00000030796	AABR07000595.1	1[-]19521208-19522171	0	0.004998	0	0	0	0	AABR07000595.1	-	GO:0005085;GO:0007264;GO:0005622;GO:0043547	-	KOG3629-Guanine-nucleotide releasing factor[T]
ENSRNOG00000049569	AABR07000629.1	1[-]20331886-20332466	0.100529	0	0	0	0	0	AABR07000629.1	-	-	-	-
ENSRNOG00000050801	AABR07000629.2	1[-]20238386-20243910	0	0	0	0	0	0	AABR07000629.2	-	-	-	-
ENSRNOG00000056218	AABR07000639.1	1[-]20735756-20737305	0	0	0	0	0	0	AABR07000639.1	-	-	-	-
ENSRNOG00000055111	AABR07000658.1	1[-]21145360-21146846	0.110504	0.047886	0.072208	2.34917	2.53424	1.66662	AABR07000658.1	-	-	-	-
ENSRNOG00000056705	AABR07000663.1	1[+]22332090-22350348	0	0	0	0	0	0	AABR07000663.1	trace amine-associated receptor 8c (Taar8c), mRNA [Source:RefSeq mRNA;Acc:NM_175600]	GO:0007186;GO:0004930;GO:0007165;GO:0004871;GO:0016021;GO:0016020;GO:0001594	K05051-ko04080 Neuroactive ligand-receptor interaction	-
ENSRNOG00000051597	AABR07000714.1	1[-]24072549-24073514	0	0	0	0	0	0	AABR07000714.1	-	-	-	-
ENSRNOG00000057722	AABR07000714.2	1[+]24076918-24081784	0	0	0	0	0	0	AABR07000714.2	-	-	-	-
ENSRNOG00000061761	AABR07000723.2	1[-]24609863-24610641	0	0	0	0	0	0	AABR07000723.2	-	-	-	-
ENSRNOG00000055637	AABR07000725.1	1[+]24825371-24828485	0	0	0	0	0	0	AABR07000725.1	-	-	-	-
ENSRNOG00000058047	AABR07000733.1	1[-]24854907-24858316	0	0	0	0	0	0	AABR07000733.1	-	-	-	-
ENSRNOG00000048796	AABR07000740.1	1[-]24922304-24924918	0	0	0	0.019618	0	0	AABR07000740.1	-	-	-	-
ENSRNOG00000056670	AABR07000902.1	1[+]27924825-27927782	0	0.010595	0	0	0	0	AABR07000902.1	-	-	-	-
ENSRNOG00000050157	AABR07000968.1	1[-]30085337-30085434	0	0	0	0	0	0	AABR07000968.1	-	-	-	-
ENSRNOG00000061372	AABR07000968.2	1[+]30196152-30197158	0	0	0	0	0	0	AABR07000968.2	-	-	-	-
ENSRNOG00000056484	AABR07000978.1	1[-]30666087-30666753	0	0	0.19774	0	0	0	AABR07000978.1	-	-	-	-
ENSRNOG00000054753	AABR07000986.1	1[-]31000772-31004646	0	0	0	0	0	0	AABR07000986.1	-	-	-	-
ENSRNOG00000061741	AABR07000989.1	1[+]31124825-31125160	0	0	0	0	0	0	AABR07000989.1	-	-	-	-
ENSRNOG00000060926	AABR07001001.1	1[+]31937653-31939296	0	0	0	0	0	0	AABR07001001.1	-	-	-	-
ENSRNOG00000053180	AABR07001003.1	1[+]32453813-32476611	0	0	0	0	0	0	AABR07001003.1	-	-	-	-
ENSRNOG00000060323	AABR07001006.1	1[+]32661251-32662221	0	0	0	0	0	0	AABR07001006.1	-	-	-	-
ENSRNOG00000057164	AABR07001010.1	1[-]33061881-33068646	0	0	0	0	0	0	AABR07001010.1	-	-	-	-
ENSRNOG00000053323	AABR07001018.1	1[+]33794803-33797299	0	0	0	0	0	0	AABR07001018.1	-	-	-	-
ENSRNOG00000054020	AABR07001018.2	1[-]33966862-33980051	0	0	0	0	0	0	AABR07001018.2	-	-	-	-
ENSRNOG00000055826	AABR07001018.3	1[+]33721420-33741396	0	0	0	0	0	0	AABR07001018.3	-	-	-	-
ENSRNOG00000056842	AABR07001018.4	1[+]33804875-33810864	0	0	0	0	0	0	AABR07001018.4	-	-	-	-
ENSRNOG00000058487	AABR07001018.5	1[-]33717804-33720703	0	0	0	0	0	0	AABR07001018.5	-	-	-	-
ENSRNOG00000054169	AABR07001019.1	1[-]34011456-34013448	0	0	0	0	0	0	AABR07001019.1	-	-	-	-
ENSRNOG00000057928	AABR07001025.1	1[-]34269359-34271920	0	0	0	0	0	0	AABR07001025.1	-	-	-	-
ENSRNOG00000057721	AABR07001035.1	1[-]35027041-35027371	0	0	0	0	0	0	AABR07001035.1	-	-	-	-
ENSRNOG00000047117	AABR07001037.1	1[-]35151638-35157157	0	0	0	0.012781	0	0	AABR07001037.1	-	-	-	-
ENSRNOG00000049434	AABR07001048.1	1[+]35526239-35527033	0	0	0	0	0	0	AABR07001048.1	-	-	-	-
ENSRNOG00000055337	AABR07001054.1	1[-]35883694-35886326	0	0	0	0	0	0	AABR07001054.1	-	-	-	-
ENSRNOG00000057357	AABR07001054.2	1[-]35922688-35996536	0	0	0	0	0	0	AABR07001054.2	-	-	-	-
ENSRNOG00000043733	AABR07001057.1	1[+]36180489-36180592	0	0	0	0	0	0	AABR07001057.1	-	-	-	-
ENSRNOG00000055880	AABR07001061.1	1[+]36589271-36683850	0	0	0	0	0	0	AABR07001061.1	-	-	-	-
ENSRNOG00000017678	AABR07001064.1	1[-]36954496-36957300	0.806977	0.978288	0.926693	0.504617	0.466477	0.838544	AABR07001064.1	-	-	-	-
ENSRNOG00000058077	AABR07001068.1	1[+]37059412-37162589	0.022851	0	0	0	0	0	AABR07001068.1	-	-	-	-
ENSRNOG00000056694	AABR07001100.1	1[-]37988255-37990007	0.135974	0.258884	0.05416	0.317019	0	0.617805	AABR07001100.1	-	GO:0005622;GO:0003676;GO:0006355	-	-
ENSRNOG00000054466	AABR07001207.1	1[-]38814643-38835507	0	0	0	0	0	0	AABR07001207.1	-	-	-	-
ENSRNOG00000057057	AABR07001210.1	1[-]38836865-38882496	0	0	0	0	0	0	AABR07001210.1	-	-	-	-
ENSRNOG00000053328	AABR07001233.1	1[-]38895131-39035633	0	0	0	0	0	0	AABR07001233.1	-	-	-	-
ENSRNOG00000023081	AABR07001348.1	1[-]39708717-39710314	0	0	0	0	0	0	AABR07001348.1	-	GO:0005886;GO:0003823;GO:0046703;GO:0001913;GO:0019882;GO:0042267	K07987-ko04650 Natural killer cell mediated cytotoxicity	-
ENSRNOG00000053056	AABR07001358.1	1[-]40232323-40255707	0	0	0	0	0	0.17202	AABR07001358.1	-	-	-	-
ENSRNOG00000054156	AABR07001392.1	1[+]42216726-42233317	0	0	0	0	0	0	AABR07001392.1	-	-	-	-
ENSRNOG00000033265	AABR07001408.1	1[-]42741148-42741551	0	0	0	0	0	0	AABR07001408.1	-	GO:0003735;GO:0003723;GO:0022625	-	KOG2988-60S ribosomal protein L30[J]
ENSRNOG00000059359	AABR07001416.2	1[+]42968983-42969111	0	0	0	0	0	0	AABR07001416.2	-	-	-	-
ENSRNOG00000060413	AABR07001416.3	1[-]42980623-42981544	0	0	0	0.127146	0	0	AABR07001416.3	-	-	-	-
ENSRNOG00000004144	AABR07001435.1	1[-]43933275-43934512	0.061254	0.15498	0.06977	0.378092	0.291257	0.368101	AABR07001435.1	-	-	-	-
ENSRNOG00000057561	AABR07001444.1	1[+]44201653-44228243	0	0	0	0	0	0	AABR07001444.1	-	-	-	-
ENSRNOG00000059546	AABR07001448.1	1[+]44789374-44835208	0	0	0	0	0	0	AABR07001448.1	-	-	-	-
ENSRNOG00000054504	AABR07001452.1	1[-]45409196-45409764	0	0	0	0	0	0	AABR07001452.1	-	-	-	-
ENSRNOG00000053507	AABR07001455.1	1[+]45621344-45622240	0	0	0	0	0	0	AABR07001455.1	-	-	-	-
ENSRNOG00000058103	AABR07001477.1	1[-]46740305-46744647	0	0	0	0	0	0	AABR07001477.1	-	-	-	-
ENSRNOG00000058258	AABR07001493.1	1[+]47513066-47537519	0	0	0	0	0	0	AABR07001493.1	-	-	-	-
ENSRNOG00000058069	AABR07001497.1	1[+]47704677-47725747	0	0	0	0	0	0	AABR07001497.1	-	-	-	-
ENSRNOG00000017412	AABR07001512.1	1[-]48565160-48565711	1.35698	0.671163	0.719348	0.782214	0.66737	1.14957	AABR07001512.1	-	GO:0004170;GO:0046080	K01520-ko00240 Pyrimidine metabolism	KOG3370-dUTPase[F]
ENSRNOG00000055981	AABR07001516.1	1[-]48681243-48686713	0	0	0	0	0	0	AABR07001516.1	-	-	-	-
ENSRNOG00000055141	AABR07001518.1	1[+]49132368-49134065	0	0	0	0	0	0	AABR07001518.1	-	-	-	-
ENSRNOG00000055547	AABR07001519.1	1[-]49290112-49844547	0.817998	0.585616	0.515701	3.05777	1.91171	3.36753	AABR07001519.1	-	GO:0004842;GO:0005739;GO:0016567;GO:0005737;GO:0042787;GO:0061630;GO:0031624;GO:0000151;GO:0000209;GO:0032436;GO:0005829	K04556-ko04141 Protein processing in endoplasmic reticulum;ko04120 Ubiquitin mediated proteolysis;ko05012 Parkinson's disease	-
ENSRNOG00000060475	AABR07001555.1	1[-]51525068-51525579	0	0	0	0	0	0.236053	AABR07001555.1	-	-	-	-
ENSRNOG00000049044	AABR07001561.1	1[-]51840126-51840208	0	0	0	0	0	0	AABR07001561.1	-	-	-	-
ENSRNOG00000057484	AABR07001573.1	1[+]53220397-53284319	0	0	0	0	0	0	AABR07001573.1	-	-	-	-
ENSRNOG00000051938	AABR07001591.1	1[+]53841653-53844518	0.042636	0	0.031935	0.242976	0.106624	0.072111	AABR07001591.1	-	-	-	-
ENSRNOG00000054756	AABR07001592.1	1[+]53982941-53983745	0	0	0	0	0	0	AABR07001592.1	-	-	-	-
ENSRNOG00000059913	AABR07001599.1	1[-]54126216-54127569	0	0	0	0	0	0	AABR07001599.1	-	-	-	-
ENSRNOG00000055136	AABR07001610.1	1[-]54223577-54287747	0	0	0	0	0	0	AABR07001610.1	-	-	-	-
ENSRNOG00000061719	AABR07001623.1	1[+]54324892-54325372	0	0	0	0	0	0	AABR07001623.1	-	-	-	-
ENSRNOG00000060438	AABR07001634.1	1[-]54439977-54441579	1.54957	1.32139	1.05739	1.23947	0.832194	1.10848	AABR07001634.1	-	-	-	-
ENSRNOG00000055577	AABR07001640.1	1[-]54499775-54506755	0	0	0	0	0	0	AABR07001640.1	-	-	-	-
ENSRNOG00000054056	AABR07001662.1	1[-]54879971-54883562	0	0	0	0	0	0	AABR07001662.1	-	-	-	-
ENSRNOG00000052700	AABR07001699.1	1[-]55356075-55360127	0	0	0	0	0	0	AABR07001699.1	-	-	-	-
ENSRNOG00000055830	AABR07001700.1	1[-]55298757-55436914	0	0	0	0	0	0	AABR07001700.1	-	-	-	-
ENSRNOG00000059261	AABR07001700.2	1[-]55375767-55380487	0	0	0	0	0	0	AABR07001700.2	-	-	-	-
ENSRNOG00000054834	AABR07001734.1	1[+]55707398-55754357	0	0	0	0	0	0	AABR07001734.1	-	-	-	-
ENSRNOG00000061057	AABR07001762.1	1[-]56538964-56541508	0	0	0	0	0	0	AABR07001762.1	-	-	-	-
ENSRNOG00000058989	AABR07001764.1	1[-]56732566-56746083	0	0	0	0	0	0	AABR07001764.1	-	-	-	-
ENSRNOG00000056729	AABR07001780.1	1[+]57666864-57667632	0	0.030381	0	0	0	0	AABR07001780.1	-	-	-	-
ENSRNOG00000052286	AABR07001799.1	1[+]57999495-58094608	0	0	0	0	0	0	AABR07001799.1	-	-	-	-
ENSRNOG00000056478	AABR07001807.1	1[-]58339947-58345450	0.002812	0	0	0.030993	0	0.018994	AABR07001807.1	-	-	-	-
ENSRNOG00000060596	AABR07001880.1	1[-]60846652-60847587	0	0	0	0	0	0	AABR07001880.1	-	-	-	-
ENSRNOG00000060716	AABR07001888.1	1[+]61219351-61220289	0	0	0	0	0	0	AABR07001888.1	-	-	-	-
ENSRNOG00000057250	AABR07001905.1	1[+]61786900-61818159	0	0	0	0.046516	0.02834	0	AABR07001905.1	-	GO:0005622;GO:0003676;GO:0006355;GO:0046872	-	-
ENSRNOG00000051570	AABR07001910.1	1[-]61870347-61872975	0	0	0	2.71278	2.49676	2.49187	AABR07001910.1	-	GO:0003676	-	-
ENSRNOG00000047884	AABR07001923.1	1[-]62112797-62114672	0.28088	0.155057	0.200004	2.589	2.96657	2.66022	AABR07001923.1	-	GO:0003676	-	KOG1721-FOG: Zn-finger[R]
ENSRNOG00000028767	AABR07001926.1	1[-]62190247-62191818	0	0	0	0	0	0	AABR07001926.1	-	GO:0003676	-	KOG1721-FOG: Zn-finger[R]
ENSRNOG00000051875	AABR07001926.2	1[-]62207548-62223307	0	0	0	0	0	0	AABR07001926.2	-	-	-	-
ENSRNOG00000061533	AABR07001926.3	1[-]62314276-62316450	0.080427	0	0.041249	0.257282	0.104839	0.228961	AABR07001926.3	-	GO:0003676	-	-
ENSRNOG00000059824	AABR07001929.1	1[-]62333297-62362553	0	0	0	0	0	0	AABR07001929.1	-	-	-	-
ENSRNOG00000055124	AABR07001942.1	1[-]62507149-62538222	0	0	0	0	0	0	AABR07001942.1	-	-	-	-
ENSRNOG00000058538	AABR07002001.1	1[+]63964155-63967366	0.148573	0.254819	0.078971	0.0375	0.075405	0.078443	AABR07002001.1	-	-	-	-
ENSRNOG00000056327	AABR07002010.1	1[-]64816762-64830953	0.050947	0.031952	0	0	0.040122	0	AABR07002010.1	-	-	-	-
ENSRNOG00000054417	AABR07002025.1	1[-]65057370-65058502	0	0	0	0	0	0	AABR07002025.1	-	GO:0055114;GO:0098869;GO:0004602;GO:0006979	-	-
ENSRNOG00000048100	AABR07002044.1	1[+]65292386-65310440	0	0	0	0	0	0	AABR07002044.1	-	GO:0007186;GO:0004930;GO:0007165;GO:0004871;GO:0016021;GO:0016020	-	KOG1056-Glutamate-gated metabotropic ion channel receptor subunit GRM2 and related subunits, G-protein coupled receptor superfamily[PT]
ENSRNOG00000051968	AABR07002066.1	1[-]65650933-65652900	0	0	0	0	0	0	AABR07002066.1	-	-	-	-
ENSRNOG00000045583	AABR07002068.1	1[-]65763521-65863037	0	0	0	0	0.009704	0	AABR07002068.1	-	GO:0006278;GO:0003964	-	-
ENSRNOG00000048663	AABR07002093.1	1[-]66275980-66321642	0	0	0	0	0	0	AABR07002093.1	-	GO:0007186;GO:0004930;GO:0007165;GO:0004871;GO:0016021;GO:0005886;GO:0016020	-	KOG1056-Glutamate-gated metabotropic ion channel receptor subunit GRM2 and related subunits, G-protein coupled receptor superfamily[PT]
ENSRNOG00000046802	AABR07002094.1	1[+]66388887-66389811	0	0	0	0	0	0	AABR07002094.1	-	-	-	-
ENSRNOG00000049720	AABR07002129.1	1[+]66748965-66749917	0	0	0	0	0	0	AABR07002129.1	-	-	-	-
ENSRNOG00000049412	AABR07002181.1	1[+]68545496-68546355	0	0	0	0	0	0	AABR07002181.1	-	-	-	-
ENSRNOG00000051882	AABR07002187.1	1[+]68649663-68650566	0	0	0	0	0	0	AABR07002187.1	-	-	-	-
ENSRNOG00000015707	AABR07002241.1	1[+]69496522-69521420	0	0	0	0	0	0	AABR07002241.1	-	GO:0004930;GO:0016021;GO:0007186;GO:0016020	-	KOG1056-Glutamate-gated metabotropic ion channel receptor subunit GRM2 and related subunits, G-protein coupled receptor superfamily[PT]
ENSRNOG00000050476	AABR07002247.1	1[+]69681569-69692765	0.017993	0.092614	0.140613	0.348198	0.317482	0.277204	AABR07002247.1	-	GO:0003676	-	KOG1721-FOG: Zn-finger[R]
ENSRNOG00000055983	AABR07002258.1	1[+]70055068-70071812	0	0	0	0	0	0	AABR07002258.1	-	-	-	-
ENSRNOG00000041209	AABR07002262.1	1[+]70389746-70389826	0	0	0	0	0	0	AABR07002262.1	-	-	-	-
ENSRNOG00000061569	AABR07002262.2	1[+]70290320-70303080	0	0	0	0	0	0	AABR07002262.2	-	-	-	-
ENSRNOG00000057132	AABR07002267.1	1[-]70516546-70517514	0	0	0	0	0	0	AABR07002267.1	-	-	-	-
ENSRNOG00000051384	AABR07002337.1	1[-]71206130-71223665	0	0	0	0	0	0	AABR07002337.1	-	-	-	-
ENSRNOG00000038674	AABR07002351.1	1[+]71734506-71735391	0	0	0	0	0	0	AABR07002351.1	-	-	-	-
ENSRNOG00000060136	AABR07002351.2	1[+]71765944-71767411	0	0	0	0	0	0	AABR07002351.2	-	GO:0003677;GO:0005634	-	-
ENSRNOG00000036304	AABR07002353.1	1[+]71805017-71805124	0	0	0	0	0	0	AABR07002353.1	-	-	-	-
ENSRNOG00000053141	AABR07002353.2	1[-]71924089-71924490	0	0	0	0	0	0	AABR07002353.2	-	-	-	-
ENSRNOG00000058893	AABR07002382.1	1[-]72259156-72260789	0	0	0	0	0	0	AABR07002382.1	-	-	-	-
ENSRNOG00000046037	AABR07002384.1	1[-]72360757-72361101	0	0	0	0	0	0	AABR07002384.1	-	-	-	-
ENSRNOG00000046577	AABR07002409.1	1[-]73230461-73230541	0	0	0	0	0	0	AABR07002409.1	-	-	-	-
ENSRNOG00000048238	AABR07002418.1	1[+]73422760-73423448	0	0	0	0	0	0	AABR07002418.1	-	-	-	-
ENSRNOG00000061661	AABR07002493.1	1[+]75636336-75645842	0.033909	0.044599	0	0	0	0	AABR07002493.1	-	-	-	-
ENSRNOG00000048028	AABR07002546.1	1[-]76651142-76653153	0.798115	1.00061	0.799099	1.33336	1.30663	1.17153	AABR07002546.1	-	-	-	-
ENSRNOG00000022227	AABR07002564.1	1[+]77111595-77111879	0.590049	0.978114	0.113024	0.386718	0.760086	1.54435	AABR07002564.1	-	-	-	-
ENSRNOG00000038251	AABR07002623.1	1[+]77782825-77789397	0.190397	0	0	0	0.155374	0	AABR07002623.1	-	GO:0005634;GO:0003677;GO:0006355;GO:0044212;GO:0003682;GO:0048666	-	-
ENSRNOG00000060587	AABR07002627.1	1[+]78112559-78149053	1.37256	1.1762	1.09735	3.18936	3.32686	3.05373	AABR07002627.1	-	-	-	-
ENSRNOG00000053001	AABR07002644.1	1[+]78342828-78342931	0	0	0	0	0	0	AABR07002644.1	-	-	-	-
ENSRNOG00000034000	AABR07002659.1	1[+]79289164-79298999	0	0	0	0	0	0	AABR07002659.1	-	GO:0016021;GO:0016020	-	-
ENSRNOG00000059266	AABR07002674.1	1[-]80190219-80191618	0.361441	0.563516	0.319305	1.01325	0.721268	0.347473	AABR07002674.1	-	-	-	-
ENSRNOG00000029745	AABR07002677.1	1[-]80330049-80331626	0	0	0	0	0	0	AABR07002677.1	-	-	-	-
ENSRNOG00000060041	AABR07002677.2	1[+]80372505-80382703	3.89181	4.28439	2.38906	0.457321	0.262738	1.28906	AABR07002677.2	-	-	-	-
ENSRNOG00000047795	AABR07002680.1	1[-]80778885-80779009	0	0	0	0	0	0	AABR07002680.1	-	-	-	-
ENSRNOG00000056832	AABR07002682.1	1[+]80944126-80951319	0	0.036703	0.041234	0	0	0.050819	AABR07002682.1	-	-	-	-
ENSRNOG00000054609	AABR07002683.1	1[+]80982358-80984217	0.087584	0.047023	0.066162	0.309559	0.270201	0.334141	AABR07002683.1	-	GO:0003924;GO:0005525;GO:0005794;GO:0005768	-	-
ENSRNOG00000041518	AABR07002711.1	1[-]82585760-82585833	0.168381	0	0	0	0.62737	0	AABR07002711.1	-	-	-	-
ENSRNOG00000055096	AABR07002768.1	1[-]83816569-83819689	0.865463	0.465769	0.520648	1.49511	2.16602	1.50945	AABR07002768.1	-	-	-	-
ENSRNOG00000048765	AABR07002774.1	1[+]84679614-84685175	0	0	0	0	0	0	AABR07002774.1	-	GO:0005622;GO:0003676;GO:0006355	-	KOG1721-FOG: Zn-finger[R]
ENSRNOG00000050995	AABR07002774.2	1[+]84652632-84653384	0.192622	0.176813	0.18046	0.408498	0.366737	0.221459	AABR07002774.2	-	GO:0003676;GO:0003700;GO:0006355	-	KOG1721-FOG: Zn-finger[R]
ENSRNOG00000048489	AABR07002775.1	1[+]84758233-84760071	0.099233	0.159836	0.136797	0.487869	0.319561	0.557943	AABR07002775.1	-	GO:0003676;GO:0003700;GO:0006355	-	KOG1721-FOG: Zn-finger[R]
ENSRNOG00000054614	AABR07002779.1	1[-]84792797-84812486	2.60579	2.05266	1.70554	1.4241	0.979682	1.36233	AABR07002779.1	-	GO:0005516	K13536-ko04666 Fc gamma R-mediated phagocytosis;ko05140 Leishmaniasis	-
ENSRNOG00000054568	AABR07002782.1	1[-]84833233-84834039	0	0	0	0	0	0	AABR07002782.1	-	-	-	-
ENSRNOG00000054618	AABR07002783.1	1[-]84842087-84856309	0	0	0	0	0	0	AABR07002783.1	-	-	-	-
ENSRNOG00000060634	AABR07002784.2	1[-]84953311-84959283	0	0	0	0	0	0	AABR07002784.2	-	-	-	-
ENSRNOG00000056831	AABR07002805.1	1[-]85567917-85575459	0	0	0	0	0	0	AABR07002805.1	-	-	-	-
ENSRNOG00000031073	AABR07002835.1	1[+]86653224-86654127	0	0	0	0	0	0	AABR07002835.1	-	-	-	-
ENSRNOG00000055006	AABR07002845.1	1[-]86802994-86803614	0	0	0	0	0	0	AABR07002845.1	-	-	-	-
ENSRNOG00000055681	AABR07002848.2	1[+]86857077-86858467	0	0	0	0	0	0	AABR07002848.2	-	-	-	-
ENSRNOG00000047624	AABR07002854.1	1[-]87153798-87155118	0.037615	0	0.076853	0.152563	0.085386	0.132792	AABR07002854.1	-	GO:0036128;GO:0097228	-	-
ENSRNOG00000057222	AABR07002868.2	1[+]87560077-87562987	0	0	0	0	0.107514	0	AABR07002868.2	-	-	-	-
ENSRNOG00000048116	AABR07002870.1	1[-]87775992-87777668	0.472964	0.503388	0.486865	0.646846	0.405439	0.336823	AABR07002870.1	-	GO:0003676;GO:0003700;GO:0006355	-	KOG1721-FOG: Zn-finger[R]
ENSRNOG00000051494	AABR07002870.2	1[-]87729677-87735308	0.030905	0.039612	0.050515	0.070105	0.030262	0.030584	AABR07002870.2	-	GO:0003676;GO:0003700;GO:0006355	-	-
ENSRNOG00000055119	AABR07002882.1	1[+]88264315-88267181	0.065955	0.049579	0.027853	0.154534	0.278147	0.083233	AABR07002882.1	-	-	-	-
ENSRNOG00000056062	AABR07002893.1	1[-]88510895-88516129	0.035532	0.045542	0.058077	0.080316	0.034659	0.035162	AABR07002893.1	-	GO:0003676;GO:0003700;GO:0006355	-	-
ENSRNOG00000047627	AABR07002896.1	1[-]88557020-88558696	0.434348	0.483903	0.486865	0.62891	0.405439	0.336823	AABR07002896.1	-	GO:0003676;GO:0003700;GO:0006355	-	KOG1721-FOG: Zn-finger[R]
ENSRNOG00000054776	AABR07002898.1	1[+]88611956-88614236	0.050065	0.069079	0.111683	0.067797	0.018719	0.143399	AABR07002898.1	-	-	-	-
ENSRNOG00000056429	AABR07002902.1	1[+]88632188-88635003	0.067569	0	0	0	0.225806	0	AABR07002902.1	-	-	-	-
ENSRNOG00000048447	AABR07002906.1	1[+]88779989-88780415	0	0	0	0	0	0	AABR07002906.1	-	-	-	-
ENSRNOG00000048484	AABR07002908.1	1[+]88862503-88862585	0.008679	0	0	0	0	0	AABR07002908.1	-	-	-	-
ENSRNOG00000061774	AABR07002910.1	1[+]88970768-88977882	0.046038	0.054082	0.027754	0.121078	0.057841	0.134373	AABR07002910.1	-	-	-	-
ENSRNOG00000055794	AABR07002923.1	1[+]89627563-89630535	0	0	0	0	0	0	AABR07002923.1	-	-	-	-
ENSRNOG00000061315	AABR07002928.1	1[+]89649636-89682737	0	0.047231	0	0.028165	0	0	AABR07002928.1	-	-	-	-
ENSRNOG00000037415	AABR07002938.1	1[-]89869772-89871299	0.144107	0.187649	0.163651	0.737365	0.443937	0.565698	AABR07002938.1	-	-	-	-
ENSRNOG00000052945	AABR07002969.1	1[+]90820595-90848674	20.6553	17.6417	19.5963	7.99405	7.62553	9.19101	AABR07002969.1	-	-	-	-
ENSRNOG00000050148	AABR07002973.1	1[-]90948960-90949386	9.40374	8.59785	9.52916	5.47553	4.71357	4.08568	AABR07002973.1	-	-	-	-
ENSRNOG00000057350	AABR07002997.1	1[-]92088190-92088447	1.89899	1.50483	0.837896	3.66411	5.09946	2.97382	AABR07002997.1	-	-	-	-
ENSRNOG00000057563	AABR07002997.2	1[-]92090250-92090556	0.070677	0.051781	0.056271	0.139161	0.088817	0.17425	AABR07002997.2	-	-	-	-
ENSRNOG00000052011	AABR07003001.1	1[+]92233676-92238216	0	0	0	0	0	0	AABR07003001.1	-	-	-	-
ENSRNOG00000059068	AABR07003001.2	1[+]92334361-92351131	0	0	0	0	0	0	AABR07003001.2	-	-	-	-
ENSRNOG00000060688	AABR07003007.1	1[+]92926554-92927997	0	0	0	0	0	0	AABR07003007.1	-	-	-	-
ENSRNOG00000053072	AABR07003024.1	1[-]93397398-93454537	0	0	0	0	0	0	AABR07003024.1	-	-	-	-
ENSRNOG00000054000	AABR07003030.1	1[-]94022752-94022882	0	0	0	0	0	0	AABR07003030.1	-	-	-	-
ENSRNOG00000055070	AABR07003030.2	1[-]94027897-94152068	0	0	0	0	0	0	AABR07003030.2	-	-	-	-
ENSRNOG00000055333	AABR07003040.1	1[-]94451268-94454182	0	0	0	0	0	0	AABR07003040.1	-	-	-	-
ENSRNOG00000037364	AABR07003049.1	1[+]94988512-94988766	0.067951	0	0	0	0	0	AABR07003049.1	-	-	-	-
ENSRNOG00000053564	AABR07003049.2	1[+]95060810-95061421	0	0	0	0	0	0	AABR07003049.2	-	-	-	-
ENSRNOG00000058448	AABR07003051.1	1[+]95240762-95242032	0	0	0	0	0	0	AABR07003051.1	-	-	-	-
ENSRNOG00000055248	AABR07003056.1	1[+]95430087-95432875	0	0	0	0	0.05411	0.055827	AABR07003056.1	-	-	-	-
ENSRNOG00000059987	AABR07003056.2	1[+]95455582-95455716	0	0.046449	0	0	0	0	AABR07003056.2	-	GO:0005622;GO:0003676;GO:0006355	-	-
ENSRNOG00000049816	AABR07003102.1	1[+]96089282-96089358	0	0	0	0	0	0	AABR07003102.1	-	-	-	-
ENSRNOG00000053427	AABR07003167.1	1[+]97063310-97065981	0	0	0	0	0	0	AABR07003167.1	-	-	-	-
ENSRNOG00000058280	AABR07003167.2	1[-]97084107-97090153	0	0	0	0	0	0	AABR07003167.2	-	-	-	-
ENSRNOG00000060881	AABR07003167.3	1[+]97131192-97134990	0	0	0	0	0	0	AABR07003167.3	-	-	-	-
ENSRNOG00000043707	AABR07003186.1	1[-]98397411-98397511	0	0	0	0	0	0	AABR07003186.1	-	-	-	-
ENSRNOG00000060684	AABR07003186.2	1[-]98472990-98473061	0.189283	0.024766	0.003314	0.758421	1.40807	0.13064	AABR07003186.2	-	-	-	-
ENSRNOG00000037348	AABR07003187.1	1[+]98644050-98645156	0.134997	0.093174	0.224326	0.356787	0.137669	0.304912	AABR07003187.1	-	-	-	-
ENSRNOG00000053135	AABR07003190.1	1[+]98757118-98757242	0	0	0	0	0	0	AABR07003190.1	-	-	-	-
ENSRNOG00000049445	AABR07003230.1	1[+]99398248-99401126	0.019547	0	0	0	0	0	AABR07003230.1	-	GO:0008236;GO:0004252;GO:0006508;GO:0016787;GO:0008233	-	KOG3627-Trypsin[E]
ENSRNOG00000049637	AABR07003233.1	1[+]99414961-99415040	0.02677	0.117389	0.090223	0.097064	0.060492	0.018245	AABR07003233.1	-	-	-	-
ENSRNOG00000049860	AABR07003241.1	1[+]99864084-99865244	0	0	0	0	0	0	AABR07003241.1	-	GO:0016021;GO:0016020	-	-
ENSRNOG00000055072	AABR07003241.2	1[-]99866052-99870024	0	0	0	0	0	0	AABR07003241.2	-	GO:0008236;GO:0004252;GO:0006508;GO:0016787;GO:0008233	-	-
ENSRNOG00000055194	AABR07003241.3	1[+]99888297-99889413	0	0	0	0	0	0	AABR07003241.3	-	-	-	-
ENSRNOG00000050893	AABR07003244.1	1[-]99940807-99944801	0	0	0	0	0	0	AABR07003244.1	-	GO:0004252;GO:0006508	-	KOG3627-Trypsin[E]
ENSRNOG00000032170	AABR07003250.1	1[-]100204022-100205147	0	0	0	0	0	0	AABR07003250.1	-	GO:0016021;GO:0016020	-	-
ENSRNOG00000050257	AABR07003273.1	1[+]103145939-103146372	0	0	0	0	0	0	AABR07003273.1	-	-	-	-
ENSRNOG00000058890	AABR07003274.1	1[-]103203719-103203774	0	0	0	0	0	0	AABR07003274.1	-	-	-	-
ENSRNOG00000022680	AABR07003291.1	1[-]103716955-103717536	0	0	0	0	0	0	AABR07003291.1	-	-	-	KOG1117-Rho- and Arf-GTPase activating protein ARAP3[TZ]
ENSRNOG00000058668	AABR07003302.1	1[-]104051953-104052132	0	0	0	0	0	0	AABR07003302.1	-	GO:0016021;GO:0016020	-	-
ENSRNOG00000053281	AABR07003304.1	1[-]104423818-104425447	0	0	0	0	0	0	AABR07003304.1	-	-	-	-
ENSRNOG00000058637	AABR07003304.2	1[+]104282029-104352990	0	0	0	0	0	0	AABR07003304.2	-	-	-	-
ENSRNOG00000052766	AABR07003310.1	1[+]105036147-105037005	0	0	0	0	0	0	AABR07003310.1	-	-	-	-
ENSRNOG00000056203	AABR07003310.2	1[+]105035649-105041320	0	0	0	0	0	0	AABR07003310.2	-	-	-	-
ENSRNOG00000056597	AABR07003310.3	1[+]105045246-105046393	0	0	0	0	0	0	AABR07003310.3	-	-	-	-
ENSRNOG00000036300	AABR07003344.1	1[+]106716460-106716565	0.095876	0.2539	0.163423	0	0.453142	0	AABR07003344.1	-	-	-	-
ENSRNOG00000055821	AABR07003349.1	1[-]106861356-106862934	0	0	0	0	0	0	AABR07003349.1	-	-	-	-
ENSRNOG00000052081	AABR07003354.1	1[-]107144545-107166382	0	0	0	0	0	0	AABR07003354.1	-	-	-	-
ENSRNOG00000051504	AABR07003380.1	1[+]108265684-108267538	0	0	0	0	0	0	AABR07003380.1	-	-	-	-
ENSRNOG00000056901	AABR07003390.1	1[-]108549069-108554727	0	0	0	0	0	0	AABR07003390.1	-	-	-	-
ENSRNOG00000061672	AABR07003392.1	1[-]108617769-108663107	0	0	0	0	0	0	AABR07003392.1	-	-	-	-
ENSRNOG00000057506	AABR07003397.1	1[-]108826042-108840622	0	0	0	0	0	0	AABR07003397.1	-	-	-	-
ENSRNOG00000060326	AABR07003398.1	1[+]108917956-108919188	0	0	0	0	0	0	AABR07003398.1	-	-	-	-
ENSRNOG00000051394	AABR07003418.1	1[+]109462377-109463963	0	0	0	0	0	0	AABR07003418.1	-	-	-	-
ENSRNOG00000037133	AABR07003433.1	1[+]109664940-109666906	0	0	0	0	0	0	AABR07003433.1	-	GO:0003723	-	KOG4053-Ataxin-1, involved in Ca2+ homeostasis[S]
ENSRNOG00000051655	AABR07003449.1	1[+]110026744-110028090	0	0	0	0	0	0	AABR07003449.1	-	-	-	-
ENSRNOG00000058191	AABR07003468.1	1[+]110995796-111002190	0	0	0	0	0	0	AABR07003468.1	-	-	-	-
ENSRNOG00000046226	AABR07003500.1	1[-]112946563-112946656	0	0	0	0	0	0	AABR07003500.1	-	-	-	-
ENSRNOG00000021484	AABR07003537.1	1[+]114174742-114175353	0.63863	0.202205	0.151078	0.554047	0.567062	1.15125	AABR07003537.1	-	-	-	-
ENSRNOG00000050721	AABR07003553.1	1[-]115076148-115076250	0	0	0	0	0	0	AABR07003553.1	-	-	-	-
ENSRNOG00000055122	AABR07003563.1	1[-]115603394-115606897	0	0	0	0	0	0	AABR07003563.1	-	-	-	-
ENSRNOG00000038697	AABR07003616.1	1[-]116918697-116919269	0	0	0	0	0	0	AABR07003616.1	-	GO:0003700;GO:0005634;GO:0003676;GO:0006351;GO:0000981;GO:0006357;GO:0006355	-	KOG1721-FOG: Zn-finger[R]
ENSRNOG00000054073	AABR07003650.1	1[+]117175108-117180632	0	0.006924	0	0	0	0	AABR07003650.1	-	-	-	-
ENSRNOG00000053358	AABR07003699.1	1[-]117629345-117631309	0	0	0	0	0	0	AABR07003699.1	-	-	-	-
ENSRNOG00000051601	AABR07003713.1	1[-]117798982-117799872	0	0	0	0	0	0	AABR07003713.1	-	-	-	-
ENSRNOG00000061194	AABR07003751.1	1[+]118050404-118089083	0	0	0	0	0	0	AABR07003751.1	-	-	-	-
ENSRNOG00000051576	AABR07003786.1	1[-]118322594-118324614	0	0	0	0	0	0	AABR07003786.1	-	-	-	-
ENSRNOG00000059762	AABR07003833.1	1[-]118826230-118826977	0	0.077269	0	0	0	0	AABR07003833.1	-	GO:0005615;GO:0006955;GO:0002377	-	-
ENSRNOG00000057034	AABR07003841.1	1[-]118976171-118977910	0	0	0	0	0	0	AABR07003841.1	-	-	-	-
ENSRNOG00000061051	AABR07003933.1	1[-]120866832-120893997	0	0	0	0	0	0	AABR07003933.1	-	-	-	-
ENSRNOG00000046092	AABR07003935.1	1[-]121210526-121210623	0	0	0	0	0	0	AABR07003935.1	-	-	-	-
ENSRNOG00000049262	AABR07003935.10	1[-]121225465-121225538	0	0	0	0	0	0	AABR07003935.10	-	-	-	-
ENSRNOG00000050219	AABR07003935.11	1[-]121175450-121175526	0	0	0	0	0	0	AABR07003935.11	-	-	-	-
ENSRNOG00000050352	AABR07003935.12	1[-]121198949-121199015	0	0	0	0	0	0	AABR07003935.12	-	-	-	-
ENSRNOG00000050415	AABR07003935.13	1[-]121181074-121181172	0	0	0	0	0	0	AABR07003935.13	-	-	-	-
ENSRNOG00000050488	AABR07003935.14	1[-]121219346-121219442	0	0	0	0	0	0	AABR07003935.14	-	-	-	-
ENSRNOG00000050556	AABR07003935.15	1[-]121197350-121197452	0	0	0	0	0	0	AABR07003935.15	-	-	-	-
ENSRNOG00000046102	AABR07003935.2	1[-]121202861-121202934	0	0	0	0	0	0	AABR07003935.2	-	-	-	-
ENSRNOG00000046737	AABR07003935.3	1[-]121240116-121240183	0	0	0	0	0	0	AABR07003935.3	-	-	-	-
ENSRNOG00000046914	AABR07003935.4	1[-]121227091-121227164	0	0	0	0	0	0	AABR07003935.4	-	-	-	-
ENSRNOG00000047240	AABR07003935.5	1[-]121187458-121187555	0	0	0	0	0	0	AABR07003935.5	-	-	-	-
ENSRNOG00000047713	AABR07003935.6	1[-]121212098-121212196	0	0	0	0	0	0	AABR07003935.6	-	-	-	-
ENSRNOG00000048836	AABR07003935.7	1[-]121263929-121264013	0	0	0	0	0	0	AABR07003935.7	-	-	-	-
ENSRNOG00000048918	AABR07003935.8	1[-]121205751-121205848	0	0	0	0	0	0	AABR07003935.8	-	-	-	-
ENSRNOG00000049058	AABR07003935.9	1[-]121213014-121213113	0	0	0	0	0	0	AABR07003935.9	-	-	-	-
ENSRNOG00000057110	AABR07003944.1	1[-]121466356-121471880	0	0	0	0	0	0	AABR07003944.1	-	-	-	-
ENSRNOG00000045916	AABR07004018.1	1[-]122591900-122591987	0	0	0	0	0	0	AABR07004018.1	-	-	-	-
ENSRNOG00000047301	AABR07004021.1	1[-]122653635-122653733	0	0	0	0	0	0	AABR07004021.1	-	-	-	-
ENSRNOG00000045763	AABR07004022.1	1[-]122662155-122662254	0	0	0	0	0	0	AABR07004022.1	-	-	-	-
ENSRNOG00000048533	AABR07004025.1	1[-]122701245-122701342	0	0	0	0	0	0	AABR07004025.1	-	-	-	-
ENSRNOG00000058845	AABR07004033.1	1[+]122881326-122889272	0	0	0	0	0	0	AABR07004033.1	-	-	-	-
ENSRNOG00000051782	AABR07004061.1	1[-]123488258-123623099	0	0	0	0	0	0	AABR07004061.1	-	-	-	-
ENSRNOG00000061295	AABR07004085.1	1[-]124059034-124076367	0.041145	0.023458	0.016543	0.045088	0.108818	0.035894	AABR07004085.1	-	-	-	-
ENSRNOG00000056061	AABR07004090.1	1[-]124288131-124311586	0	0	0	0	0	0	AABR07004090.1	-	-	-	-
ENSRNOG00000057921	AABR07004100.1	1[-]124743354-124756178	0	0	0	0	0	0	AABR07004100.1	-	-	-	-
ENSRNOG00000049002	AABR07004101.1	1[-]125082559-125082674	0	0	0	0	0	0	AABR07004101.1	-	-	-	-
ENSRNOG00000060733	AABR07004101.2	1[-]124927202-124930193	0	0	0	0	0	0	AABR07004101.2	-	-	-	-
ENSRNOG00000016498	AABR07004112.1	1[+]125877299-125879830	0.911299	0.668196	0.381514	1.82589	1.7596	2.28066	AABR07004112.1	-	-	-	-
ENSRNOG00000053064	AABR07004130.1	1[-]126386929-126403406	0	0	0	0	0	0	AABR07004130.1	-	-	-	-
ENSRNOG00000056928	AABR07004134.1	1[-]126632957-126633307	0	0	0	0	0	0	AABR07004134.1	-	-	-	-
ENSRNOG00000061645	AABR07004136.1	1[-]126691038-126694921	0	0	0	0	0	0	AABR07004136.1	-	-	-	-
ENSRNOG00000060823	AABR07004153.1	1[+]127654062-127654191	0	0	0	0	0	0	AABR07004153.1	-	-	-	-
ENSRNOG00000032310	AABR07004183.1	1[-]129227595-129228068	0	0	0	0	0	0	AABR07004183.1	-	GO:0016853;GO:0003755;GO:0006457;GO:0000413	-	KOG0865-Cyclophilin type peptidyl-prolyl cis-trans isomerase[O]
ENSRNOG00000056064	AABR07004189.1	1[+]129530789-129545656	0	0	0	0	0	0	AABR07004189.1	-	-	-	-
ENSRNOG00000051696	AABR07004221.1	1[-]130651031-130652295	0	0	0	0	0	0	AABR07004221.1	-	-	-	-
ENSRNOG00000057208	AABR07004221.2	1[-]130544421-130715502	0	0	0	0	0	0	AABR07004221.2	-	-	-	-
ENSRNOG00000058019	AABR07004227.1	1[+]131139084-131141517	0	0	0	0	0	0	AABR07004227.1	-	-	-	-
ENSRNOG00000059662	AABR07004228.1	1[-]131380879-131431948	0.026078	0.034367	0.014096	0.086008	0.206669	0.186433	AABR07004228.1	-	-	-	-
ENSRNOG00000053709	AABR07004229.1	1[+]131464722-131464849	0	0	0	0	0	0	AABR07004229.1	-	-	-	-
ENSRNOG00000048904	AABR07004232.1	1[-]131584306-131585731	0.020479	0	0	0	0.01878	0	AABR07004232.1	-	GO:0003727;GO:0032197;GO:0030529	-	-
ENSRNOG00000054097	AABR07004232.2	1[+]131688104-131690120	0	0	0	0.029661	0.069154	0.028805	AABR07004232.2	-	-	-	-
ENSRNOG00000055614	AABR07004241.1	1[-]132343795-132349092	0	0	0	0	0	0	AABR07004241.1	-	-	-	-
ENSRNOG00000055864	AABR07004241.2	1[+]132497813-132503537	0	0	0	0	0	0	AABR07004241.2	-	-	-	-
ENSRNOG00000053587	AABR07004254.1	1[-]134028907-134030448	0	0	0	0	0	0	AABR07004254.1	-	-	-	-
ENSRNOG00000048799	AABR07004263.1	1[+]134605321-134605443	0	0	0	0	0	0	AABR07004263.1	-	-	-	-
ENSRNOG00000041447	AABR07004269.1	1[-]134946880-134946944	0	0	0	0	0	0	AABR07004269.1	-	-	-	-
ENSRNOG00000051426	AABR07004269.2	1[-]134951356-134951760	0	0	0	0	0	0	AABR07004269.2	-	-	-	-
ENSRNOG00000058004	AABR07004269.3	1[-]135083659-135084385	0.111247	0.26002	0.073846	0.115898	0.13539	0.120213	AABR07004269.3	-	-	-	-
ENSRNOG00000053689	AABR07004294.1	1[+]135943311-135943396	0	0	0	0	0	0	AABR07004294.1	-	-	-	-
ENSRNOG00000060667	AABR07004297.1	1[+]136075092-136075221	0	0	0	0	0	0	AABR07004297.1	-	-	-	-
ENSRNOG00000057892	AABR07004305.1	1[-]136295254-136298565	0	0	0	0	0	0	AABR07004305.1	-	-	-	-
ENSRNOG00000060303	AABR07004364.1	1[-]139196994-139199494	0	0	0	0	0	0	AABR07004364.1	-	-	-	-
ENSRNOG00000030679	AABR07004397.1	1[+]141214456-141214791	5.19209	3.79162	4.19034	5.2744	10.0688	7.44866	AABR07004397.1	-	-	-	-
ENSRNOG00000054325	AABR07004397.2	1[-]141209402-141210059	0.335666	0.198042	0.113502	1.22508	1.69735	2.29855	AABR07004397.2	-	-	-	-
ENSRNOG00000060197	AABR07004404.1	1[+]141675044-141679522	0.202077	0	0	0.169707	0	0.197773	AABR07004404.1	-	-	-	-
ENSRNOG00000061889	AABR07004428.1	1[+]142500591-142511760	0	0	0	0	0	0	AABR07004428.1	-	-	-	-
ENSRNOG00000060573	AABR07004437.1	1[-]142893642-142893953	0	0	0	0	0	0	AABR07004437.1	-	-	-	-
ENSRNOG00000044405	AABR07004481.1	1[-]144833192-144833259	0	0	0	0	0	0	AABR07004481.1	-	-	-	-
ENSRNOG00000054650	AABR07004482.1	1[+]144847336-144848188	0	0	0	0	0	0	AABR07004482.1	-	-	-	-
ENSRNOG00000059905	AABR07004482.2	1[-]144891366-144896140	0	0	0	0	0	0	AABR07004482.2	-	-	-	-
ENSRNOG00000055810	AABR07004495.1	1[-]146347014-146348053	0	0	0	0	0	0	AABR07004495.1	-	-	-	-
ENSRNOG00000041552	AABR07004497.1	1[-]146824787-146824903	0	0	0	0	0.1991	0	AABR07004497.1	-	-	-	-
ENSRNOG00000056445	AABR07004530.1	1[-]147156909-147158367	0.214993	0.384394	0.05877	0.852697	0.77498	0.689544	AABR07004530.1	-	-	-	-
ENSRNOG00000056733	AABR07004539.1	1[-]147260830-147272006	0	0	0	0	0.082852	0	AABR07004539.1	-	GO:0020037;GO:0005506;GO:0055114;GO:0016705;GO:0008392;GO:0019373	-	-
ENSRNOG00000059330	AABR07004549.1	1[-]147422779-147435897	1487.97	1477.68	1286.24	2221.18	1942.11	1571.51	AABR07004549.1	-	-	-	-
ENSRNOG00000054930	AABR07004572.1	1[+]147696656-147700221	0.443769	0.827665	0.056951	3.41098	3.89464	2.93174	AABR07004572.1	-	-	-	-
ENSRNOG00000013711	AABR07004681.1	1[+]149901165-149902095	0	0	0	0	0	0	AABR07004681.1	-	-	-	-
ENSRNOG00000051996	AABR07004703.1	1[+]151210180-151216454	0	0	0	0	0	0	AABR07004703.1	-	-	-	-
ENSRNOG00000056844	AABR07004733.1	1[+]153456407-153457441	0	0	0	0	0	0	AABR07004733.1	-	-	-	-
ENSRNOG00000058110	AABR07004733.2	1[-]153446051-153461943	0	0	0	0	0	0	AABR07004733.2	-	-	-	-
ENSRNOG00000050403	AABR07004743.1	1[+]153772098-153772280	0	0	0	0	0	0	AABR07004743.1	-	-	-	-
ENSRNOG00000036296	AABR07004746.1	1[+]154132240-154132345	4.02736	2.80455	4.5461	2.14115	2.18105	3.05499	AABR07004746.1	-	-	-	-
ENSRNOG00000058731	AABR07004756.1	1[+]154627147-154627245	0	0	0	0	0	0	AABR07004756.1	-	-	-	-
ENSRNOG00000054312	AABR07004761.1	1[+]154822669-154830055	0	0	0	0	0	0	AABR07004761.1	-	-	-	-
ENSRNOG00000056160	AABR07004765.1	1[+]155281256-155281354	0	0	0	0	0	0	AABR07004765.1	-	-	-	-
ENSRNOG00000051568	AABR07004776.1	1[-]155954832-155955173	0	0	0	0	0	0	AABR07004776.1	-	GO:0016323;GO:0007268;GO:0008328;GO:0004385;GO:0035255;GO:0007399;GO:0043113;GO:0045197;GO:0046037;GO:0046710;GO:0097120;GO:0014069;GO:0045211	-	-
ENSRNOG00000061395	AABR07004776.2	1[-]156000922-156001053	0	0.007655	0	0	0	0	AABR07004776.2	-	-	-	-
ENSRNOG00000059114	AABR07004783.1	1[+]156493429-156509596	0	0	0	0	0	0	AABR07004783.1	-	-	-	-
ENSRNOG00000010769	AABR07004799.1	1[-]157920746-157921401	0	0	0	0	0	0	AABR07004799.1	-	-	-	-
ENSRNOG00000046332	AABR07004812.1	1[+]158864346-158864722	0	0	0	0	0	0	AABR07004812.1	-	-	-	-
ENSRNOG00000052460	AABR07004812.2	1[-]158913005-158913381	0	0	0	0	0	0	AABR07004812.2	-	-	-	-
ENSRNOG00000053655	AABR07004823.1	1[-]159633956-159635635	0	0	0	0	0	0	AABR07004823.1	-	-	-	-
ENSRNOG00000041624	AABR07004833.1	1[+]160124217-160124310	0	0	0	0	0	0	AABR07004833.1	-	-	-	-
ENSRNOG00000045706	AABR07004852.1	1[+]161281059-161281158	0	0	0	0	0	0	AABR07004852.1	-	-	-	-
ENSRNOG00000056551	AABR07004868.1	1[+]163520160-163523003	0	0	0	0	0	0	AABR07004868.1	-	-	-	-
ENSRNOG00000057308	AABR07004868.2	1[+]163459074-163461083	0.204603	0.197949	0.184014	0.055912	0	0.064678	AABR07004868.2	-	-	-	-
ENSRNOG00000018083	AABR07004876.1	1[+]164807422-164807805	0.390894	0.106761	0.280191	0.093715	0.053422	0.277934	AABR07004876.1	-	-	-	-
ENSRNOG00000053276	AABR07004876.2	1[+]164815783-164823298	0	0	0	0	0	0	AABR07004876.2	-	-	-	-
ENSRNOG00000052319	AABR07004881.1	1[+]165284410-165284635	0.314434	0	0.078656	0.451469	0.778136	0.881193	AABR07004881.1	-	-	-	-
ENSRNOG00000056725	AABR07004888.1	1[-]166119376-166120978	0	0	0	0	0	0	AABR07004888.1	-	-	-	-
ENSRNOG00000033196	AABR07004891.1	1[-]166186925-166189741	0	0	0	0	0	0	AABR07004891.1	-	-	-	-
ENSRNOG00000028974	AABR07004894.1	1[-]166282107-166282689	58.4358	44.0558	56.0882	20.7902	22.297	22.2192	AABR07004894.1	-	-	-	-
ENSRNOG00000021946	AABR07004945.1	1[+]171420482-171421630	0	0	0	0	0	0	AABR07004945.1	-	-	-	-
ENSRNOG00000059184	AABR07004947.1	1[+]171485327-171486167	0	0	0	0	0	0	AABR07004947.1	-	-	-	-
ENSRNOG00000046444	AABR07004949.1	1[-]171520009-171520108	0	0	0	0	0	0	AABR07004949.1	-	-	-	-
ENSRNOG00000053648	AABR07004960.1	1[+]172822544-172823476	0	0	0	0	0	0	AABR07004960.1	-	GO:0050911;GO:0050896;GO:0007608;GO:0007186;GO:0005549;GO:0004984;GO:0004930;GO:0007165;GO:0004871;GO:0016021;GO:0005886;GO:0016020	K04257-ko04740 Olfactory transduction	-
ENSRNOG00000054215	AABR07004971.1	1[+]172971182-172972128	0	0	0	0	0	0	AABR07004971.1	-	-	-	-
ENSRNOG00000052236	AABR07004992.1	1[+]173275336-173284941	0	0	0	0	0	0	AABR07004992.1	-	GO:0005506;GO:0055114;GO:0016491;GO:0016705;GO:0031418	K09592-ko04066 HIF-1 signaling pathway;ko05200 Pathways in cancer;ko05211 Renal cell carcinoma	-
ENSRNOG00000042292	AABR07004993.1	1[+]173346237-173347369	0.066028	0	0.03696	0.055074	0	0.039076	AABR07004993.1	-	-	-	-
ENSRNOG00000041603	AABR07004996.1	1[+]173672483-173672596	0	0	0	0	0	0	AABR07004996.1	-	-	-	-
ENSRNOG00000054551	AABR07005004.1	1[+]174133689-174133796	0	0	0.29716	0.400077	0.150665	0	AABR07005004.1	-	-	-	-
ENSRNOG00000060924	AABR07005004.2	1[+]174134747-174134870	0	0.125665	0	0.880313	0.451934	0.342501	AABR07005004.2	-	-	-	-
ENSRNOG00000050468	AABR07005027.1	1[-]175586209-175586802	0	0	0	0	0.177494	0	AABR07005027.1	-	-	-	-
ENSRNOG00000056820	AABR07005028.1	1[-]175683826-175684113	0.050942	0.05077	0.037489	0.046713	0.020221	0.033304	AABR07005028.1	-	-	-	-
ENSRNOG00000059835	AABR07005028.2	1[+]175620634-175620740	0.012964	0	0	0	0	0.000758	AABR07005028.2	-	-	-	-
ENSRNOG00000036293	AABR07005031.1	1[-]176078559-176078664	0.13788	0.014529	0.131108	0.231058	0.133824	0.183523	AABR07005031.1	-	-	-	-
ENSRNOG00000060840	AABR07005031.2	1[+]176050238-176052953	0	0	0	0	0	0	AABR07005031.2	-	-	-	-
ENSRNOG00000057739	AABR07005032.1	1[+]176621985-176623536	0	0	0	0	0	0	AABR07005032.1	-	-	-	-
ENSRNOG00000043512	AABR07005040.1	1[-]177591988-177592287	0	0	0	0	0	0	AABR07005040.1	-	GO:0005739;GO:0055114;GO:0016020;GO:0005743;GO:0070469;GO:0008137;GO:0005747	-	KOG3446-NADH:ubiquinone oxidoreductase NDUFA2/B8 subunit[C]
ENSRNOG00000054914	AABR07005040.2	1[+]177529377-177529505	0	0	0	0	0	0	AABR07005040.2	-	-	-	-
ENSRNOG00000047039	AABR07005416.1	1[-]182841658-182841763	0	0	0	0	0	0	AABR07005416.1	-	-	-	-
ENSRNOG00000041637	AABR07005447.1	1[+]183123391-183123497	0	0	0	0	0	0	AABR07005447.1	-	-	-	-
ENSRNOG00000025122	AABR07005506.1	1[-]183629450-183630695	0	0	0	0	0	0	AABR07005506.1	-	GO:0022627;GO:0000028;GO:0003735;GO:0005840;GO:0006412;GO:0030529;GO:0048027;GO:0070181;GO:0000462	-	KOG0407-40S ribosomal protein S14[J]
ENSRNOG00000061369	AABR07005508.1	1[-]183884015-183892454	0	0	0	0.042936	0.032226	0.145546	AABR07005508.1	-	-	-	-
ENSRNOG00000020477	AABR07005533.1	1[+]185171547-185172851	0.180555	0.141102	0.105864	0.560606	0.631425	0.427418	AABR07005533.1	-	-	-	-
ENSRNOG00000051825	AABR07005535.1	1[-]185353166-185356627	0.256833	0.277113	0.180906	0.410761	0.511216	0.252438	AABR07005535.1	-	-	-	-
ENSRNOG00000030807	AABR07005549.1	1[-]186640425-186641393	9.54158	8.99477	7.64661	17.0141	18.0728	16.2509	AABR07005549.1	-	-	-	-
ENSRNOG00000051465	AABR07005565.1	1[+]187884619-187884863	0	0.029112	0	0.261734	0.070306	0	AABR07005565.1	-	-	-	-
ENSRNOG00000057326	AABR07005569.1	1[+]187973557-187975053	0	0	0	0	0	0	AABR07005569.1	-	-	-	-
ENSRNOG00000051432	AABR07005572.1	1[-]188161372-188166411	0	0	0	0	0	0	AABR07005572.1	-	-	-	-
ENSRNOG00000057531	AABR07005573.1	1[+]188254890-188258346	0	0	0	0	0	0	AABR07005573.1	-	-	-	-
ENSRNOG00000057396	AABR07005581.1	1[-]189009019-189014540	0	0	0	0	0.028683	0.001043	AABR07005581.1	-	-	-	-
ENSRNOG00000054843	AABR07005593.1	1[-]189688872-189703841	0	0.021666	0	0	0	0	AABR07005593.1	-	-	-	-
ENSRNOG00000059503	AABR07005596.1	1[+]189798060-189822197	0	0	0	0	0	0	AABR07005596.1	-	-	-	-
ENSRNOG00000061844	AABR07005618.1	1[-]190368884-190370499	7.7733	8.48769	5.1709	11.3762	10.8143	11.2869	AABR07005618.1	-	GO:0003723;GO:0006400	-	-
ENSRNOG00000055297	AABR07005633.1	1[+]190671696-190672043	0.636661	0.05568	0.141929	0.62286	0.820708	0.539182	AABR07005633.1	-	GO:0016021;GO:0016020	-	-
ENSRNOG00000048403	AABR07005664.1	1[-]193022382-193022458	0	0	0	0	0	0	AABR07005664.1	-	-	-	-
ENSRNOG00000024217	AABR07005667.1	1[+]193537137-193537946	0	0	0	0	0	0	AABR07005667.1	-	GO:0016620;GO:0055114	-	KOG0657-Glyceraldehyde 3-phosphate dehydrogenase[G]
ENSRNOG00000057137	AABR07005752.1	1[-]195864391-195867147	0	0	0	0	0	0	AABR07005752.1	-	-	-	-
ENSRNOG00000057349	AABR07005758.1	1[-]196399025-196415261	0	0	0	0	0	0	AABR07005758.1	-	-	-	-
ENSRNOG00000060297	AABR07005758.2	1[-]196471508-196471648	0	0	0	0	0	0	AABR07005758.2	-	-	-	-
ENSRNOG00000059566	AABR07005778.1	1[+]198058765-198061499	0	0	0	0.043639	0	0	AABR07005778.1	-	-	-	-
ENSRNOG00000050338	AABR07005779.1	1[-]198505418-198505495	0	0	0	0	0	0	AABR07005779.1	-	-	-	-
ENSRNOG00000054418	AABR07005779.2	1[+]198800801-198801816	0.805531	0.866604	0.381613	1.27623	0.909768	1.13997	AABR07005779.2	-	-	-	-
ENSRNOG00000054961	AABR07005779.3	1[-]198241481-198243516	0.009073	0.009497	0	0	0	0	AABR07005779.3	-	-	-	-
ENSRNOG00000056571	AABR07005779.4	1[-]198162429-198168448	0.150257	0.193984	0.041846	0	0.03481	0	AABR07005779.4	-	-	-	-
ENSRNOG00000060009	AABR07005794.1	1[+]200364371-200373126	0.097768	0.041077	0.048459	0.080891	0.048499	0.094207	AABR07005794.1	-	-	-	-
ENSRNOG00000057653	AABR07005806.1	1[-]200547940-200548317	0	0	0	0	0	0	AABR07005806.1	-	-	-	-
ENSRNOG00000052932	AABR07005808.1	1[-]200767537-200782159	0	0	0	0	0	0	AABR07005808.1	-	-	-	-
ENSRNOG00000053642	AABR07005828.1	1[+]202348499-202348583	0	0	0	0	0	0	AABR07005828.1	-	-	-	-
ENSRNOG00000054067	AABR07005837.1	1[-]202704299-202707503	0	0	0	0	0.047032	0	AABR07005837.1	-	-	-	-
ENSRNOG00000054093	AABR07005837.2	1[-]202707512-202714441	0	0	0	0	0.221279	0	AABR07005837.2	-	-	-	-
ENSRNOG00000020446	AABR07005838.1	1[+]202904461-202904895	0.283863	0.183262	0.188142	0.957419	0.436705	0.795058	AABR07005838.1	-	-	-	-
ENSRNOG00000054087	AABR07005838.2	1[+]202829567-202829706	0	0	0	0	0	0	AABR07005838.2	-	-	-	-
ENSRNOG00000034038	AABR07005844.1	1[+]203160323-203228318	2.57323	8.93399	1.08283	3.167	3.11941	4.13293	AABR07005844.1	-	GO:0005576;GO:0016020;GO:0016021;GO:0005044;GO:0006898	K13912-ko04970 Salivary secretion	-
ENSRNOG00000061037	AABR07005871.1	1[-]203452126-203453051	0	0	0	0	0	0	AABR07005871.1	-	-	-	-
ENSRNOG00000053539	AABR07005886.1	1[+]204092151-204096473	0	0	0	0	0	0	AABR07005886.1	-	GO:0022627;GO:0000028;GO:0003735;GO:0005840;GO:0006412;GO:0005622	-	-
ENSRNOG00000046586	AABR07005888.1	1[-]204695304-204695357	0	0	0	0	0	0	AABR07005888.1	-	-	-	-
ENSRNOG00000060219	AABR07005888.2	1[+]204320821-204321136	0	0.056428	0	0	0	0	AABR07005888.2	-	-	-	-
ENSRNOG00000054593	AABR07005939.1	1[+]207639277-207639588	0	0	0	0	0	0	AABR07005939.1	-	-	-	-
ENSRNOG00000059505	AABR07005949.1	1[+]208274486-208308876	0	0	0	0	0	0	AABR07005949.1	-	-	-	-
ENSRNOG00000061500	AABR07005950.1	1[+]208521333-208522639	0	0	0	0	0	0	AABR07005950.1	-	-	-	-
ENSRNOG00000053950	AABR07005955.1	1[-]208684167-208694479	0	0	0	0	0	0	AABR07005955.1	-	-	-	-
ENSRNOG00000054210	AABR07005961.1	1[+]209076255-209077598	0	0	0	0	0	0	AABR07005961.1	-	-	-	-
ENSRNOG00000055312	AABR07005965.1	1[-]209507812-209511089	0	0	0	0	0	0	AABR07005965.1	-	-	-	-
ENSRNOG00000052216	AABR07005977.1	1[-]210515987-210517727	0	0	0	0	0	0	AABR07005977.1	-	-	-	-
ENSRNOG00000052927	AABR07005977.2	1[-]210504694-210505982	0	0	0	0	0	0	AABR07005977.2	-	-	-	-
ENSRNOG00000059695	AABR07005977.3	1[+]210397953-210398729	0	0	0	0	0	0	AABR07005977.3	-	-	-	-
ENSRNOG00000059125	AABR07005985.2	1[+]212146248-212148936	0	0	0	0	0	0	AABR07005985.2	-	-	-	-
ENSRNOG00000057858	AABR07006025.1	1[-]214009644-214009924	0.051964	0.022421	0	0.075275	0.08718	0.154864	AABR07006025.1	-	-	-	-
ENSRNOG00000046602	AABR07006030.1	1[+]214664537-214693043	0	0	0	0	0	0	AABR07006030.1	-	GO:0005576	K10955-ko05110 Vibrio cholerae infection;ko05146 Amoebiasis	KOG1216-von Willebrand factor and related coagulation proteins[WV]
ENSRNOG00000055996	AABR07006032.1	1[+]214727416-214741252	0	0	0	0	0	0	AABR07006032.1	-	GO:0070701	-	-
ENSRNOG00000058420	AABR07006033.1	1[+]214747625-214756309	0	0	0	0	0	0	AABR07006033.1	-	GO:0005576	-	-
ENSRNOG00000061253	AABR07006038.1	1[-]214973712-215005141	0	0	0	0.072642	0	0	AABR07006038.1	-	-	-	-
ENSRNOG00000028955	AABR07006042.1	1[+]215135482-215144181	0	0	0	0	0	0	AABR07006042.1	-	GO:0045095;GO:0005882	-	-
ENSRNOG00000046649	AABR07006049.1	1[-]215057617-215423099	0	0	0	0	0	0	AABR07006049.1	-	GO:0045095;GO:0005882	-	-
ENSRNOG00000048049	AABR07006049.2	1[-]215298161-215310013	2.4623	2.15053	1.41338	1.61324	2.08525	2.00575	AABR07006049.2	-	-	-	KOG0249-LAR-interacting protein and related proteins[R]
ENSRNOG00000016597	AABR07006081.1	1[-]218972445-218973047	0	0.014588	0	0.017447	0.005033	0	AABR07006081.1	-	-	-	-
ENSRNOG00000047224	AABR07006084.1	1[-]219091288-219091387	0	0	0	0	0	0	AABR07006084.1	-	-	-	-
ENSRNOG00000049240	AABR07006090.1	1[+]219264400-219264477	0	0	0	0	0	0	AABR07006090.1	-	-	-	-
ENSRNOG00000051859	AABR07006093.1	1[-]219514005-219514065	0	0	0	0.049276	0	0	AABR07006093.1	-	-	-	-
ENSRNOG00000057099	AABR07006097.1	1[-]219752584-219758885	0.004413	0.025839	0.062102	0	0.042312	0	AABR07006097.1	-	-	-	-
ENSRNOG00000020409	AABR07006111.1	1[+]220610638-220611492	0.332113	0.542933	0.477212	0.5291	0.719122	0.66975	AABR07006111.1	-	-	-	-
ENSRNOG00000056396	AABR07006120.1	1[-]222969448-222975509	0	0	0	0.034873	0	0	AABR07006120.1	-	-	-	-
ENSRNOG00000043478	AABR07006142.1	1[+]223214132-223263133	0	0	0	0	0	0.060472	AABR07006142.1	-	GO:0016021;GO:0016020	-	-
ENSRNOG00000017884	AABR07006160.1	1[-]223549179-223549904	0.744839	1.27734	0.70259	1.41437	1.75842	2.06364	AABR07006160.1	-	-	-	-
ENSRNOG00000053356	AABR07006197.1	1[-]224139544-224161012	0	0	0	0	0	0	AABR07006197.1	-	-	-	-
ENSRNOG00000049738	AABR07006232.1	1[-]225627979-225631468	0	0	0	0	0	0	AABR07006232.1	-	-	-	-
ENSRNOG00000036633	AABR07006255.1	1[+]226038411-226038987	0	0	0.013646	0	0.019617	0	AABR07006255.1	-	-	-	-
ENSRNOG00000028444	AABR07006258.1	1[+]226252226-226252732	0	0	0	0	0	0	AABR07006258.1	-	-	-	-
ENSRNOG00000055023	AABR07006258.2	1[+]226258417-226258557	0.231742	0.137423	0.131149	0.270029	0.577074	0.397758	AABR07006258.2	-	GO:0016021;GO:0016020	-	-
ENSRNOG00000046782	AABR07006259.1	1[-]227169191-227175096	0.041634	0.054703	0.018273	0	0	0.0499	AABR07006259.1	-	GO:0016020;GO:0016021;GO:0005044;GO:0006898	-	-
ENSRNOG00000056620	AABR07006263.1	1[+]227287194-227290294	2.17153	0.841521	1.2184	2.79255	2.63088	1.35331	AABR07006263.1	-	-	-	-
ENSRNOG00000020980	AABR07006278.1	1[+]227892956-227904737	0.028005	0.040902	0	0.073215	0.315447	0.021648	AABR07006278.1	-	GO:0016021;GO:0016020	-	-
ENSRNOG00000021084	AABR07006310.1	1[+]228724900-228727160	59.4461	66.2164	45.9447	54.2378	45.3433	62.3251	AABR07006310.1	-	-	-	-
ENSRNOG00000060420	AABR07006311.1	1[-]228785961-228815673	0.071227	0.040642	0	0.190775	0.188878	0.09575	AABR07006311.1	-	-	-	-
ENSRNOG00000041469	AABR07006327.1	1[-]229065931-229066050	0.841226	0.105997	0.297263	1.97329	0.806566	3.48674	AABR07006327.1	-	-	-	-
ENSRNOG00000059146	AABR07006328.1	1[+]229097483-229100403	0	0	0	0	0	0	AABR07006328.1	-	-	-	-
ENSRNOG00000050414	AABR07006333.1	1[-]229206153-229206780	0.861382	0.836291	0.617412	2.00231	1.68305	2.7128	AABR07006333.1	-	-	-	-
ENSRNOG00000005112	AABR07006367.1	1[-]231364776-231365651	0.033337	0.040439	0.120393	0.113425	0.055432	0	AABR07006367.1	-	-	-	-
ENSRNOG00000058399	AABR07006389.1	1[-]232315995-232345509	0	0	0	0	0	0	AABR07006389.1	-	-	-	-
ENSRNOG00000055431	AABR07006428.1	1[-]233241021-233255123	0	0	0	0	0	0	AABR07006428.1	-	-	-	-
ENSRNOG00000058581	AABR07006436.1	1[-]233668290-233670164	0	0	0	0	0	0	AABR07006436.1	-	-	-	-
ENSRNOG00000029732	AABR07006451.1	1[+]234183427-234184434	0	0	0	0	0	0	AABR07006451.1	-	GO:0016620;GO:0055114	-	-
ENSRNOG00000052693	AABR07006453.1	1[+]235023131-235056705	0	0	0	0	0	0	AABR07006453.1	-	-	-	-
ENSRNOG00000046420	AABR07006458.1	1[-]235387153-235405831	1.28627	0.736305	0.795629	3.44058	2.61732	3.54522	AABR07006458.1	-	-	-	KOG1809-Vacuolar protein sorting-associated protein[U]
ENSRNOG00000058389	AABR07006475.1	1[+]236547584-236579222	0	0.017231	0	0.037228	0.055836	0.030352	AABR07006475.1	-	-	-	-
ENSRNOG00000042788	AABR07006480.1	1[-]236884534-236900904	0	0	0	0	0	0	AABR07006480.1	-	-	-	KOG4129-Exopolyphosphatases and related proteins[C]
ENSRNOG00000031086	AABR07006504.1	1[+]237574788-237575252	0	0	0	0	0	0	AABR07006504.1	-	-	K01527-ko04214 Apoptosis - fly	-
ENSRNOG00000048390	AABR07006536.1	1[-]238833585-238837001	0	0	0	0	0	0	AABR07006536.1	-	-	-	KOG3166-60S ribosomal protein L7A[J]
ENSRNOG00000057614	AABR07006536.2	1[+]238932773-238933469	0	0	0	0	0	0	AABR07006536.2	-	-	-	-
ENSRNOG00000058035	AABR07006542.1	1[-]239313285-239319003	0	0	0	0	0	0	AABR07006542.1	-	-	-	-
ENSRNOG00000052861	AABR07006544.1	1[-]239377814-239378095	0	0	0	0	0	0	AABR07006544.1	-	-	-	-
ENSRNOG00000057279	AABR07006566.1	1[-]240339754-240341633	0	0	0	0	0	0	AABR07006566.1	-	-	-	-
ENSRNOG00000056301	AABR07006591.1	1[+]241771537-241771691	0	0	0	0	0	0	AABR07006591.1	-	-	-	-
ENSRNOG00000050486	AABR07006619.1	1[-]242808965-242810186	0	0	0	0	0	0	AABR07006619.1	-	-	-	-
ENSRNOG00000058592	AABR07006649.1	1[-]244209064-244212421	0	0	0	0	0	0	AABR07006649.1	-	-	-	-
ENSRNOG00000051821	AABR07006654.1	1[-]244421212-244540147	0	0	0	0	0	0	AABR07006654.1	-	-	-	-
ENSRNOG00000059909	AABR07006654.2	1[+]244446887-244448695	0	0	0	0	0	0	AABR07006654.2	-	-	-	-
ENSRNOG00000053506	AABR07006656.1	1[+]244977331-244980976	0	0	0	0	0	0	AABR07006656.1	-	-	-	-
ENSRNOG00000055788	AABR07006656.2	1[-]244798722-244800426	0	0	0	0	0	0	AABR07006656.2	-	-	-	-
ENSRNOG00000057920	AABR07006656.3	1[+]244877688-244908212	0	0	0	0	0	0	AABR07006656.3	-	-	-	-
ENSRNOG00000053314	AABR07006657.1	1[-]245097090-245099482	0	0	0	0	0	0	AABR07006657.1	-	-	-	-
ENSRNOG00000052384	AABR07006672.1	1[-]245816791-245817809	0	0	0	0	0	0	AABR07006672.1	-	-	-	-
ENSRNOG00000059944	AABR07006685.1	1[-]246927618-246938377	0	0	0	0	0	0	AABR07006685.1	-	-	-	-
ENSRNOG00000030934	AABR07006688.1	1[-]248213480-248213740	0	0	0	0	0	0	AABR07006688.1	-	-	-	KOG1668-Elongation factor 1 beta/delta chain[K]
ENSRNOG00000031628	AABR07006688.2	1[+]248210041-248214063	0.082732	0	0	0	0	0.365855	AABR07006688.2	-	GO:0016021;GO:0016020;GO:0006414;GO:0003746;GO:0005853	-	KOG1668-Elongation factor 1 beta/delta chain[K]
ENSRNOG00000056566	AABR07006689.1	1[+]248405029-248412537	0.295031	0	0	0	0	0	AABR07006689.1	-	-	-	-
ENSRNOG00000036288	AABR07006693.1	1[-]248474409-248474497	0	0	0	0	0.06267	0.317059	AABR07006693.1	-	-	-	-
ENSRNOG00000060655	AABR07006713.1	1[+]248987572-249005123	0	0	0	0	0	0	AABR07006713.1	-	-	-	-
ENSRNOG00000053728	AABR07006724.1	1[-]250105678-250200076	0.037996	0.05503	0	0.038978	0	0.11394	AABR07006724.1	-	-	-	-
ENSRNOG00000052057	AABR07006727.1	1[-]250300653-250300952	0.097021	0	0.073172	0.038408	0.13944	0.005406	AABR07006727.1	-	-	-	-
ENSRNOG00000061760	AABR07006736.1	1[-]250660087-250662721	0	0	0	0	0	0	AABR07006736.1	-	-	-	-
ENSRNOG00000058869	AABR07006740.1	1[+]250987654-250988034	0	0	0	0	0	0	AABR07006740.1	-	-	-	-
ENSRNOG00000036287	AABR07006742.1	1[+]251158483-251158583	0	0	0	0.047948	0	0	AABR07006742.1	-	-	-	-
ENSRNOG00000056210	AABR07006752.1	1[-]251387786-251401116	0	0	0	0	0	0	AABR07006752.1	-	-	-	-
ENSRNOG00000050417	AABR07006774.1	1[+]257724842-257729237	0.406146	0.152529	0.232459	1.58597	0.974721	1.09187	AABR07006774.1	-	-	-	-
ENSRNOG00000047214	AABR07006775.1	1[+]257747175-257749708	0.218242	0.05752	0.057727	1.05562	0.466741	0.313231	AABR07006775.1	-	-	-	KOG2223-Uncharacterized conserved protein, contains TBC domain[TR]
ENSRNOG00000045862	AABR07006823.1	1[-]258476697-258477481	0	0	0	0	0	0	AABR07006823.1	-	GO:0007276	-	-
ENSRNOG00000053865	AABR07006854.1	1[+]259018827-259025923	0	0	0	0	0	0	AABR07006854.1	-	-	-	-
ENSRNOG00000056594	AABR07006854.2	1[+]259107204-259111402	0	0	0	0	0	0	AABR07006854.2	-	-	-	-
ENSRNOG00000053424	AABR07006860.1	1[+]260832285-260832421	0.389381	0.196101	0.202902	0.234032	0.638228	0.382352	AABR07006860.1	-	-	-	-
ENSRNOG00000055976	AABR07006866.1	1[+]261072895-261073736	3.34732	3.51128	4.32877	2.81863	2.89148	2.93704	AABR07006866.1	-	-	-	-
ENSRNOG00000053536	AABR07006871.1	1[+]261464063-261464605	0	0	0	0	0	0	AABR07006871.1	-	GO:0016579;GO:0004843	-	-
ENSRNOG00000061256	AABR07006888.1	1[-]262847720-262854734	0	0	0	0	0	0	AABR07006888.1	-	-	-	-
ENSRNOG00000053185	AABR07006889.1	1[+]262923269-262932424	0.188465	0.188577	0.187597	0.22542	0.233768	0.394335	AABR07006889.1	-	-	-	-
ENSRNOG00000051771	AABR07006894.1	1[-]263002286-263013858	1.42653	1.38555	1.33185	1.94275	2.16675	2.1123	AABR07006894.1	-	-	-	-
ENSRNOG00000055137	AABR07006904.1	1[-]270475429-270478996	0	0	0	0	0	0	AABR07006904.1	-	-	-	-
ENSRNOG00000053954	AABR07006911.1	1[-]270712141-270730856	0	0	0	0	0	0	AABR07006911.1	-	-	-	-
ENSRNOG00000051797	AABR07006953.1	1[-]272844130-272859555	0	0	0	0	0	0	AABR07006953.1	-	-	-	-
ENSRNOG00000061600	AABR07006957.1	1[+]273059292-273061119	0	0	0	0	0	0	AABR07006957.1	-	-	-	-
ENSRNOG00000048790	AABR07006978.1	1[-]275005755-275005822	0	0	0	0	0	0	AABR07006978.1	-	-	-	-
ENSRNOG00000056528	AABR07006978.2	1[+]274935119-274937530	0	0	0	0	0	0	AABR07006978.2	-	-	-	-
ENSRNOG00000060255	AABR07006993.1	1[+]275673780-275677233	0	0	0	0	0	0	AABR07006993.1	-	-	-	-
ENSRNOG00000048568	AABR07006999.1	1[+]275972844-275972918	0	0	0	0	0	0	AABR07006999.1	-	-	-	-
ENSRNOG00000013993	AABR07007000.1	1[-]276011416-276012351	1.56946	2.15995	2.05227	4.15127	4.44551	4.72066	AABR07007000.1	-	GO:0008013;GO:0006357;GO:0005634;GO:0016055;GO:0060070;GO:0033153	-	KOG3248-Transcription factor TCF-4[K]
ENSRNOG00000056577	AABR07007023.1	1[+]277459200-277460299	0	0	0	0	0	0	AABR07007023.1	-	-	-	-
ENSRNOG00000052188	AABR07007026.1	1[+]277540445-277574901	0	0	0	0	0	0	AABR07007026.1	-	-	-	-
ENSRNOG00000061365	AABR07007055.1	1[-]278476630-278480271	1.40003	1.51772	1.03931	0.282053	0.125568	0.214377	AABR07007055.1	-	-	-	-
ENSRNOG00000048681	AABR07007064.1	1[+]279018730-279018798	0	0	0	0	0	0	AABR07007064.1	-	-	-	-
ENSRNOG00000061842	AABR07007065.1	1[-]279109373-279110658	0	0	0	0	0	0	AABR07007065.1	-	-	-	-
ENSRNOG00000056390	AABR07007078.1	1[+]279687833-279695099	0	0	0	0	0	0	AABR07007078.1	-	-	-	-
ENSRNOG00000061164	AABR07007078.2	1[-]279710092-279713333	0	0	0	0	0	0	AABR07007078.2	-	-	-	-
ENSRNOG00000048641	AABR07007086.1	1[+]280069186-280069246	0	0	0	0	0	0	AABR07007086.1	-	-	-	-
ENSRNOG00000052677	AABR07007088.1	1[-]280346941-280348386	0	0	0	0	0	0	AABR07007088.1	-	-	-	-
ENSRNOG00000058931	AABR07007088.2	1[-]280297823-280299238	0	0	0	0	0	0	AABR07007088.2	-	-	-	-
ENSRNOG00000034090	AABR07007092.1	1[-]280753840-280754217	0	0	0	0	0	0	AABR07007092.1	-	-	-	-
ENSRNOG00000052475	AABR07007093.1	1[-]280942891-280970960	0	0	0	0	0	0	AABR07007093.1	-	-	-	-
ENSRNOG00000056674	AABR07007095.1	1[-]281314160-281315353	0	0	0	0	0	0	AABR07007095.1	-	-	-	-
ENSRNOG00000033843	AABR07007121.1	1[+]282063929-282064741	10.6767	8.15384	9.76037	4.01747	5.75668	5.44148	AABR07007121.1	-	GO:0042254;GO:0030529	K02936-ko03010 Ribosome	KOG3166-60S ribosomal protein L7A[J]
ENSRNOG00000042665	AABR07007130.2	1[-]282498488-282498880	0.076051	0.090395	0.161556	1.01152	0.127308	1.57528	AABR07007130.2	-	GO:0005622;GO:0003676;GO:0006355	-	KOG1721-FOG: Zn-finger[R]
ENSRNOG00000051496	AABR07007134.1	1[+]282557426-282557923	0.179248	0.090231	0	0	0.041506	0.0749	AABR07007134.1	-	GO:0019464;GO:0005960	K02437-ko00630 Glyoxylate and dicarboxylate metabolism;ko00260 Glycine, serine and threonine metabolism	-
ENSRNOG00000050701	AABR07007385.1	2[+]11885754-11886045	0	0	0	0	0	0	AABR07007385.1	-	-	-	-
ENSRNOG00000058141	AABR07007391.1	2[-]12127994-12130345	0	0	0	0	0	0.056884	AABR07007391.1	-	-	-	-
ENSRNOG00000049010	AABR07007399.1	2[-]12311862-12312287	0	0	0	0	0	0	AABR07007399.1	-	GO:0003735;GO:0005840;GO:0006412;GO:0005622;GO:0002181;GO:0022625;GO:0030529	-	KOG3504-60S ribosomal protein L29[J]
ENSRNOG00000058632	AABR07007409.1	2[-]13054400-13055215	0	0	0	0	0	0	AABR07007409.1	-	-	-	-
ENSRNOG00000041270	AABR07007517.1	2[-]16779590-16779682	0	0	0	0	0	0	AABR07007517.1	-	-	-	-
ENSRNOG00000048330	AABR07007544.1	2[-]17939270-17939794	0	0	0	0	0	0	AABR07007544.1	-	GO:0003727;GO:0032197;GO:0030529	-	-
ENSRNOG00000054888	AABR07007566.1	2[+]19431858-19477207	0	0	0	0	0	0	AABR07007566.1	-	-	-	-
ENSRNOG00000051789	AABR07007584.1	2[+]20349845-20350945	0	0	0	0	0	0	AABR07007584.1	-	-	-	-
ENSRNOG00000053513	AABR07007584.2	2[-]20344767-20344855	0	0	0	0	0	0	AABR07007584.2	-	-	-	-
ENSRNOG00000055958	AABR07007584.3	2[+]20315411-20326414	0	0	0	0	0	0	AABR07007584.3	-	-	-	-
ENSRNOG00000051732	AABR07007592.1	2[-]20724191-20724323	0	0	0	0	0	0	AABR07007592.1	-	-	-	-
ENSRNOG00000036436	AABR07007645.1	2[+]21942274-21942362	0	0	0	0	0	0	AABR07007645.1	-	-	-	-
ENSRNOG00000052958	AABR07007663.1	2[-]22864491-22868109	0	0	0	0	0	0	AABR07007663.1	-	-	-	-
ENSRNOG00000058886	AABR07007675.1	2[+]23257915-23258315	0	0	0	0	0	0	AABR07007675.1	-	-	-	-
ENSRNOG00000041423	AABR07007689.1	2[-]23891748-23891825	0	0	0	0	0	0.120591	AABR07007689.1	-	-	-	-
ENSRNOG00000010615	AABR07007690.1	2[+]24197870-24197976	0	0	0	0.273117	0.222307	0	AABR07007690.1	-	-	-	-
ENSRNOG00000041749	AABR07007690.2	2[+]24178708-24178820	0	0	0	0	0	0	AABR07007690.2	-	-	-	-
ENSRNOG00000055870	AABR07007693.1	2[+]24557174-24559506	0	0	0	0	0	0	AABR07007693.1	-	-	-	-
ENSRNOG00000061142	AABR07007715.1	2[+]25331304-25344147	0	0	0	0	0	0	AABR07007715.1	-	-	-	-
ENSRNOG00000056427	AABR07007717.1	2[+]25564884-25565757	0	0	0	0	0	0	AABR07007717.1	-	-	-	-
ENSRNOG00000057200	AABR07007717.2	2[-]25546190-25547646	0	0	0	0	0	0	AABR07007717.2	-	-	-	-
ENSRNOG00000060525	AABR07007717.3	2[+]25535712-25537531	0.212533	0.265172	0	0.818926	0.620802	1.00499	AABR07007717.3	-	-	-	-
ENSRNOG00000018045	AABR07007730.1	2[+]26085846-26086265	0.470271	0.444367	0.593959	0.264801	0.205059	0.347516	AABR07007730.1	-	-	-	-
ENSRNOG00000041964	AABR07007743.1	2[-]26641703-26641835	0	0	0	0	0	0	AABR07007743.1	-	-	-	-
ENSRNOG00000045746	AABR07007744.1	2[-]26812444-26818679	0	0	0	0	0	0	AABR07007744.1	-	-	-	-
ENSRNOG00000060714	AABR07007744.2	2[-]26869828-26870421	0	0	0	0	0	0	AABR07007744.2	-	-	-	-
ENSRNOG00000057460	AABR07007745.1	2[-]26938345-26938491	0	0	0	0	0	0	AABR07007745.1	-	-	-	-
ENSRNOG00000046691	AABR07007758.1	2[-]27324634-27324734	0	0	0	0	0	0	AABR07007758.1	-	-	-	-
ENSRNOG00000060072	AABR07007765.1	2[+]27571150-27575775	0	0	0	0	0	0	AABR07007765.1	-	-	-	-
ENSRNOG00000051888	AABR07007775.1	2[-]27802610-27815004	0.049094	0	0	0	0.13024	0.019594	AABR07007775.1	-	-	-	-
ENSRNOG00000053598	AABR07007789.1	2[+]28263976-28282979	0	0	0	0	0	0.264747	AABR07007789.1	-	-	-	-
ENSRNOG00000061197	AABR07007793.1	2[-]28657210-28658903	0	0	0	0	0	0	AABR07007793.1	-	-	-	-
ENSRNOG00000059761	AABR07007798.1	2[-]28834124-28839602	0	0	0	0.057022	0	0	AABR07007798.1	-	-	-	-
ENSRNOG00000061406	AABR07007799.1	2[-]28836635-28843039	0.030239	0	0	0	0.086387	0.044857	AABR07007799.1	-	-	-	-
ENSRNOG00000055452	AABR07007802.1	2[-]28879596-28882171	0	0	0	0	0	0	AABR07007802.1	-	-	-	-
ENSRNOG00000056276	AABR07007802.2	2[-]28873315-28877995	0	0	0	0	0	0	AABR07007802.2	-	-	-	-
ENSRNOG00000051366	AABR07007833.1	2[-]29795417-29796180	0	0	0	0	0	0	AABR07007833.1	-	-	-	-
ENSRNOG00000056895	AABR07007833.2	2[+]29784402-29786727	0	0	0	0	0	0	AABR07007833.2	-	-	-	-
ENSRNOG00000059805	AABR07007839.1	2[+]30094421-30095423	0	0	0	0	0	0	AABR07007839.1	-	-	-	-
ENSRNOG00000048656	AABR07007853.1	2[+]31378743-31379225	0.319228	0.058773	0.258284	0.083461	0.318177	0.088373	AABR07007853.1	-	GO:0005840;GO:0006412;GO:0003735;GO:0005622	K02889-ko03010 Ribosome	KOG1732-60S ribosomal protein L21[J]
ENSRNOG00000056525	AABR07007853.2	2[+]31386066-31388447	0	0	0	0.051489	0.153794	0.300698	AABR07007853.2	-	-	-	-
ENSRNOG00000052924	AABR07007863.1	2[-]31844981-31870693	0.048673	0	0	0	0	0	AABR07007863.1	-	-	-	-
ENSRNOG00000054794	AABR07007874.1	2[-]32297366-32297914	0	0	0	0	0	0	AABR07007874.1	-	-	-	-
ENSRNOG00000060901	AABR07007875.1	2[+]32310059-32310555	0	0.115309	0	0	0	0	AABR07007875.1	-	-	-	-
ENSRNOG00000059628	AABR07007878.1	2[-]32530316-32553340	0	0	0	0	0	0	AABR07007878.1	-	-	-	-
ENSRNOG00000058177	AABR07007879.1	2[-]32632800-32636371	0	0	0	0	0	0	AABR07007879.1	-	-	-	-
ENSRNOG00000056649	AABR07007896.1	2[-]33995882-34007096	0	0	0	0	0	0	AABR07007896.1	-	-	-	-
ENSRNOG00000049248	AABR07007905.1	2[-]34418946-34419428	0.602224	0.226232	0.538864	0.068456	0.604768	0.53138	AABR07007905.1	-	GO:0003735;GO:0005840;GO:0006412;GO:0005622;GO:0022625	K02889-ko03010 Ribosome	KOG1732-60S ribosomal protein L21[J]
ENSRNOG00000053229	AABR07007905.2	2[-]34443939-34452895	0	0	0	0	0	0	AABR07007905.2	-	-	-	-
ENSRNOG00000052866	AABR07007924.1	2[+]35185821-35186744	0	0	0	0	0	0	AABR07007924.1	-	-	-	-
ENSRNOG00000047601	AABR07007928.1	2[+]35392291-35393088	0	0	0	0	0	0	AABR07007928.1	-	GO:0050911;GO:0050896;GO:0007608;GO:0007186;GO:0005549;GO:0004984;GO:0004930;GO:0007165;GO:0004871;GO:0016021;GO:0005886;GO:0016020	K04257-ko04740 Olfactory transduction	-
ENSRNOG00000049977	AABR07007931.1	2[-]35482426-35485401	0	0	0	0	0	0	AABR07007931.1	-	GO:0050911;GO:0050896;GO:0007608;GO:0007186;GO:0005549;GO:0004984;GO:0004930;GO:0007165;GO:0004871;GO:0016021;GO:0005886;GO:0016020	K04257-ko04740 Olfactory transduction	-
ENSRNOG00000051778	AABR07007978.1	2[+]36914433-36914546	0	0	0	0	0	0	AABR07007978.1	-	-	-	-
ENSRNOG00000053154	AABR07007980.1	2[-]36966808-36969914	0	0	0	0	0	0	AABR07007980.1	-	-	-	-
ENSRNOG00000057850	AABR07007980.2	2[-]37023183-37032305	0	0	0	0	0	0	AABR07007980.2	-	-	-	-
ENSRNOG00000056598	AABR07007987.1	2[+]37425157-37427858	0	0	0	0	0	0	AABR07007987.1	-	-	-	-
ENSRNOG00000061053	AABR07007997.1	2[+]38212675-38218144	0	0	0	0	0	0	AABR07007997.1	-	-	-	-
ENSRNOG00000053649	AABR07008013.1	2[+]38743597-38745922	0	0	0	0	0	0	AABR07008013.1	-	-	-	-
ENSRNOG00000053767	AABR07008014.1	2[-]38909222-38914122	0	0.042826	0.030649	0.080179	0.110916	0	AABR07008014.1	-	-	-	-
ENSRNOG00000050795	AABR07008016.1	2[-]38978677-38979020	0.969491	1.41994	0.790036	5.39616	4.56614	3.47731	AABR07008016.1	-	-	-	-
ENSRNOG00000032097	AABR07008025.1	2[+]39507490-39507960	0	0	0	0	0	0	AABR07008025.1	-	-	-	-
ENSRNOG00000051672	AABR07008030.1	2[+]39619209-39630099	0	0.014438	0	0.054898	0	0	AABR07008030.1	-	-	-	-
ENSRNOG00000041930	AABR07008066.1	2[+]41418813-41418886	0	0	0	0	0	0	AABR07008066.1	-	-	-	-
ENSRNOG00000047236	AABR07008066.2	2[+]41467064-41467252	0.184905	0.327064	0.299204	1.40485	1.44431	1.16439	AABR07008066.2	-	-	-	-
ENSRNOG00000054928	AABR07008074.1	2[-]42001910-42002030	0	0	0	0	0	0	AABR07008074.1	-	-	-	-
ENSRNOG00000026928	AABR07008097.1	2[+]42726809-42728026	0.365508	0.169857	0.25791	0.094179	0.20507	0.075293	AABR07008097.1	-	GO:0006096;GO:0004618;GO:0016310;GO:0016740;GO:0016301;GO:0005524	-	KOG1367-3-phosphoglycerate kinase[G]
ENSRNOG00000048490	AABR07008099.1	2[+]42830338-42830421	0	0	0	0	0	0	AABR07008099.1	-	-	-	-
ENSRNOG00000058955	AABR07008099.2	2[-]42877462-42878865	0	0	0	0	0	0	AABR07008099.2	-	-	-	-
ENSRNOG00000054424	AABR07008103.1	2[-]42977283-42977359	0	0	0	0	0	0	AABR07008103.1	-	-	-	-
ENSRNOG00000054714	AABR07008107.1	2[-]43783125-43788998	0	0	0	0	0	0	AABR07008107.1	-	-	-	-
ENSRNOG00000053901	AABR07008108.1	2[+]44012095-44013489	0	0	0	0.064673	0.13042	0	AABR07008108.1	-	-	-	-
ENSRNOG00000059665	AABR07008118.1	2[-]44266202-44272164	0	0	0	0	0	0	AABR07008118.1	-	-	-	-
ENSRNOG00000054288	AABR07008126.1	2[-]44645687-44647654	0	0	0	0	0	0	AABR07008126.1	-	-	-	-
ENSRNOG00000052560	AABR07008142.1	2[-]45616187-45619717	0	0	0	0	0	0	AABR07008142.1	-	-	-	-
ENSRNOG00000058109	AABR07008152.1	2[-]46040030-46042636	0	0	0	0	0	0	AABR07008152.1	-	-	-	-
ENSRNOG00000052163	AABR07008180.1	2[+]47077333-47077443	0	0	0	0	0	0	AABR07008180.1	-	-	-	-
ENSRNOG00000054421	AABR07008255.1	2[-]49682395-49682854	0	0	0	0	0.077314	0	AABR07008255.1	-	-	-	-
ENSRNOG00000052551	AABR07008256.1	2[+]49789991-49794041	0	0	0	0	0	0	AABR07008256.1	-	-	-	-
ENSRNOG00000056804	AABR07008256.2	2[+]49799312-49801874	0	0	0	0	0	0	AABR07008256.2	-	-	-	-
ENSRNOG00000059924	AABR07008259.1	2[+]49857555-49908248	0	0	0	0	0	0	AABR07008259.1	-	-	-	-
ENSRNOG00000054616	AABR07008285.1	2[-]51412042-51412311	0	0	0	0	0	0	AABR07008285.1	-	-	-	-
ENSRNOG00000056600	AABR07008287.1	2[-]51597524-51613880	0	0	0	0	0	0	AABR07008287.1	-	-	-	-
ENSRNOG00000061261	AABR07008287.2	2[-]51568669-51582499	0	0	0	0	0	0	AABR07008287.2	-	-	-	-
ENSRNOG00000026899	AABR07008293.1	2[-]52170909-52171016	0	0	0	0	0	0	AABR07008293.1	-	-	-	-
ENSRNOG00000048493	AABR07008293.2	2[+]52152536-52153557	0	0	0	0	0.017496	0	AABR07008293.2	-	GO:0003727;GO:0032197;GO:0030529	-	-
ENSRNOG00000057463	AABR07008293.3	2[+]52156243-52157357	0	0.015353	0	0.04493	0	0	AABR07008293.3	-	-	-	-
ENSRNOG00000054825	AABR07008298.1	2[-]52618639-52619088	0	0	0	0	0	0	AABR07008298.1	-	-	-	-
ENSRNOG00000061553	AABR07008298.2	2[-]52569554-52609466	0	0	0	0	0	0	AABR07008298.2	-	-	-	-
ENSRNOG00000039481	AABR07008300.1	2[-]52658259-52658781	0	0	0	0	0	0	AABR07008300.1	-	-	-	-
ENSRNOG00000052649	AABR07008309.1	2[+]52783382-52785194	0	0	0	0	0	0	AABR07008309.1	-	-	-	-
ENSRNOG00000056627	AABR07008319.1	2[+]52855671-52871706	0	0	0	0	0	0	AABR07008319.1	-	-	-	-
ENSRNOG00000054353	AABR07008341.1	2[-]53510189-53511029	0	0	0	0	0	0	AABR07008341.1	-	-	-	-
ENSRNOG00000048753	AABR07008350.1	2[-]53717661-53718143	0	0	0	0	0.101553	0	AABR07008350.1	-	GO:0003735;GO:0005840;GO:0006412;GO:0005622;GO:0022625	K02889-ko03010 Ribosome	KOG1732-60S ribosomal protein L21[J]
ENSRNOG00000058923	AABR07008386.1	2[+]55308564-55341195	0	0	0	0	0	0	AABR07008386.1	-	-	-	-
ENSRNOG00000059278	AABR07008399.1	2[-]56195186-56218051	0	0	0	0	0	0	AABR07008399.1	-	-	-	-
ENSRNOG00000058320	AABR07008420.1	2[+]57677745-57677905	0.154785	0.087126	0	0.568394	0.191558	0.938796	AABR07008420.1	-	-	-	-
ENSRNOG00000030748	AABR07008421.1	2[-]57728679-57728960	0.052815	0	0.035326	0	0	0	AABR07008421.1	-	-	-	-
ENSRNOG00000056794	AABR07008424.1	2[-]57942970-57944530	0	0	0	0	0	0	AABR07008424.1	-	-	-	-
ENSRNOG00000055126	AABR07008440.1	2[-]58647365-58647465	0	0	0	0	0	0	AABR07008440.1	-	-	-	-
ENSRNOG00000060305	AABR07008462.1	2[+]59849941-59901109	0	0	0	0.110414	0.179715	0.152685	AABR07008462.1	-	-	-	-
ENSRNOG00000061419	AABR07008485.1	2[-]61038505-61038964	0	0	0	0	0	0.10066	AABR07008485.1	-	-	-	-
ENSRNOG00000059296	AABR07008491.1	2[+]61495949-61507586	0	0	0	0	0	0	AABR07008491.1	-	-	-	-
ENSRNOG00000036432	AABR07008505.1	2[-]62556301-62556406	607.342	553.898	635.751	610.834	625.302	553.529	AABR07008505.1	-	-	-	-
ENSRNOG00000056876	AABR07008513.1	2[+]62904400-62904540	0.037305	0.042779	0.051683	0.075421	0.082387	0.090885	AABR07008513.1	-	-	-	-
ENSRNOG00000055784	AABR07008530.1	2[+]63732502-63734702	0	0	0	0	0	0	AABR07008530.1	-	-	-	-
ENSRNOG00000058937	AABR07008568.1	2[-]65010320-65011966	0	0	0	0.113742	0	0	AABR07008568.1	-	-	-	-
ENSRNOG00000058273	AABR07008594.1	2[-]65851534-65870885	0	0	0	0	0	0	AABR07008594.1	-	-	-	-
ENSRNOG00000053100	AABR07008597.1	2[-]66285366-66304400	0	0	0	0	0	0	AABR07008597.1	-	-	-	-
ENSRNOG00000061232	AABR07008655.1	2[+]68819418-68820198	0.051667	0	0	0	0	0	AABR07008655.1	-	-	-	-
ENSRNOG00000051543	AABR07008661.1	2[+]69035820-69038748	0	0	0	0	0	0	AABR07008661.1	-	-	-	-
ENSRNOG00000047646	AABR07008670.1	2[+]69736724-69737635	0	0	0	0	0	0	AABR07008670.1	-	-	-	-
ENSRNOG00000053969	AABR07008681.1	2[+]70490155-70497730	0	0	0	0	0	0	AABR07008681.1	-	GO:0003727;GO:0032197;GO:0030529	-	-
ENSRNOG00000019037	AABR07008724.1	2[+]71753816-71754546	0	0	0	0	0	0	AABR07008724.1	-	GO:0003735;GO:0005840;GO:0006412;GO:0005622;GO:0022625;GO:0003729;GO:0000463	-	-
ENSRNOG00000057307	AABR07008788.1	2[+]73912228-73956986	0	0	0	0	0	0	AABR07008788.1	-	-	-	-
ENSRNOG00000046150	AABR07008805.1	2[+]74713974-74714276	0.133328	0.064734	0.27168	0	0.109365	0	AABR07008805.1	-	-	-	-
ENSRNOG00000061700	AABR07008844.1	2[-]76364585-76366218	0	0	0	0	0	0	AABR07008844.1	-	-	-	-
ENSRNOG00000051488	AABR07008878.1	2[+]77113585-77161631	0	0	0	0	0	0	AABR07008878.1	-	-	-	-
ENSRNOG00000047140	AABR07008890.1	2[-]77425520-77426592	0	0	0	0.00221	0	0	AABR07008890.1	-	-	-	-
ENSRNOG00000059376	AABR07008898.1	2[+]77667099-77670498	0	0	0	0	0	0	AABR07008898.1	-	-	-	-
ENSRNOG00000056969	AABR07008911.1	2[-]78282959-78283473	0	0	0	0	0	0	AABR07008911.1	-	GO:0003723;GO:0000398	-	-
ENSRNOG00000050680	AABR07008916.1	2[+]79316431-79316533	0	0	0	0	0	0	AABR07008916.1	-	-	-	-
ENSRNOG00000011997	AABR07008940.1	2[+]80269661-80273790	0	0	0	0	0	0	AABR07008940.1	-	-	-	-
ENSRNOG00000055866	AABR07008948.1	2[-]80853567-80861370	0	0	0	0	0	0	AABR07008948.1	-	-	-	-
ENSRNOG00000058721	AABR07008970.1	2[+]81722541-81729594	0	0	0	0	0	0	AABR07008970.1	-	-	-	-
ENSRNOG00000057131	AABR07008991.1	2[-]82506386-82507406	0	0	0	0	0	0	AABR07008991.1	-	-	-	-
ENSRNOG00000059117	AABR07009002.1	2[+]82771577-82773155	0	0	0	0	0	0	AABR07009002.1	-	-	-	-
ENSRNOG00000051925	AABR07009028.1	2[-]84127560-84160056	0	0	0	0	0	0	AABR07009028.1	-	-	-	-
ENSRNOG00000061466	AABR07009031.1	2[-]84230132-84240656	0	0	0	0	0.085626	0	AABR07009031.1	-	-	-	-
ENSRNOG00000049844	AABR07009052.1	2[+]85818911-85819012	0	0	0	0	0	0	AABR07009052.1	-	-	-	-
ENSRNOG00000053325	AABR07009105.1	2[+]86951776-86964358	1.03583	0.91464	0.615604	1.38485	1.91569	1.18711	AABR07009105.1	-	GO:0005622;GO:0003676;GO:0006355	-	-
ENSRNOG00000056034	AABR07009154.1	2[+]87734711-87785345	0	0	0	0	0	0	AABR07009154.1	-	-	-	-
ENSRNOG00000056029	AABR07009161.1	2[-]87896256-87898224	0	0	0	0	0.117319	0	AABR07009161.1	-	-	-	-
ENSRNOG00000049504	AABR07009221.1	2[+]89254154-89259657	0	0	0	0	0	0.004109	AABR07009221.1	-	GO:0006278;GO:0003964	-	-
ENSRNOG00000042602	AABR07009224.1	2[-]89498123-89498395	0	0	0	0	0	0	AABR07009224.1	-	GO:0005634;GO:0003676	-	KOG0118-FOG: RRM domain[R]
ENSRNOG00000051687	AABR07009247.1	2[-]90211236-90251627	0	0	0	0	0	0	AABR07009247.1	-	-	-	-
ENSRNOG00000053978	AABR07009260.1	2[+]90605861-90606963	0	0	0	0	0	0	AABR07009260.1	-	-	-	-
ENSRNOG00000055758	AABR07009338.1	2[-]93460282-93488702	0	0	0	0	0	0	AABR07009338.1	-	-	-	-
ENSRNOG00000058574	AABR07009351.1	2[-]93845582-93847327	0	0	0	0	0	0	AABR07009351.1	-	-	-	-
ENSRNOG00000050719	AABR07009357.1	2[-]94315538-94315976	0	0	0	0	0	0	AABR07009357.1	-	-	-	KOG3358-Uncharacterized secreted protein SDF2 (Stromal cell-derived factor 2), contains MIR domains[R]
ENSRNOG00000060543	AABR07009357.2	2[+]94302449-94303608	0	0	0	0	0	0	AABR07009357.2	-	-	-	-
ENSRNOG00000011429	AABR07009373.1	2[-]94902666-94903226	0	0	0	0	0	0	AABR07009373.1	-	GO:0003677;GO:0005634	-	-
ENSRNOG00000055250	AABR07009373.2	2[-]94819556-94868949	0	0	0	0	0	0	AABR07009373.2	-	-	-	-
ENSRNOG00000055011	AABR07009377.1	2[+]94960161-94960543	0.010258	0.028178	0.028351	0	0.016894	0.018362	AABR07009377.1	-	-	-	-
ENSRNOG00000048822	AABR07009395.1	2[+]95832934-95833003	0	0	0	0	0	0	AABR07009395.1	-	-	-	-
ENSRNOG00000055685	AABR07009428.1	2[-]97672492-97674726	0	0	0	0	0	0	AABR07009428.1	-	-	-	-
ENSRNOG00000046362	AABR07009457.1	2[-]98613709-98614045	0	0	0	0	0	0	AABR07009457.1	-	-	-	-
ENSRNOG00000021867	AABR07009508.1	2[+]100955041-100955793	0	0	0	0	0	0	AABR07009508.1	-	-	-	KOG4106-Uncharacterized conserved protein[S]
ENSRNOG00000059377	AABR07009536.1	2[-]102153927-102164484	0	0	0	0	0	0	AABR07009536.1	-	-	-	-
ENSRNOG00000038752	AABR07009538.1	2[-]102301406-102301790	0	0	0	0	0	0	AABR07009538.1	-	-	-	-
ENSRNOG00000013038	AABR07009572.1	2[+]103750787-103751344	0	0.063485	0	0	0	0	AABR07009572.1	-	GO:0005886;GO:0003924;GO:0005525;GO:0030100;GO:0005769;GO:0030139	-	KOG0092-GTPase Rab5/YPT51 and related small G protein superfamily GTPases[U]
ENSRNOG00000051894	AABR07009599.1	2[+]105399770-105400548	0	0	0	0	0	0	AABR07009599.1	-	-	-	-
ENSRNOG00000059333	AABR07009599.2	2[-]105282135-105285104	0	0	0	0	0	0	AABR07009599.2	-	-	-	-
ENSRNOG00000056127	AABR07009600.1	2[-]105475653-105477109	0	0	0	0	0	0	AABR07009600.1	-	-	-	-
ENSRNOG00000056581	AABR07009600.2	2[+]105588843-105633873	0	0	0	0	0	0	AABR07009600.2	-	-	-	-
ENSRNOG00000052367	AABR07009634.1	2[-]106570519-106574691	0	0	0	0	0	0	AABR07009634.1	-	-	-	-
ENSRNOG00000052903	AABR07009634.2	2[+]106593186-106661028	0	0	0	0	0	0	AABR07009634.2	-	-	-	-
ENSRNOG00000051963	AABR07009638.2	2[+]106739312-106741832	0	0	0	0	0	0	AABR07009638.2	-	-	-	-
ENSRNOG00000053422	AABR07009639.1	2[+]106849284-106850891	0	0	0	0	0	0	AABR07009639.1	-	-	-	-
ENSRNOG00000031378	AABR07009715.1	2[+]109317339-109318124	2.32435	2.26453	1.73073	2.06748	1.51913	1.8438	AABR07009715.1	-	-	-	-
ENSRNOG00000036430	AABR07009786.1	2[+]112289670-112289760	0	0	0	0	0	0	AABR07009786.1	-	-	-	-
ENSRNOG00000041563	AABR07009786.2	2[-]112270856-112270981	0	0	0	0	0	0	AABR07009786.2	-	-	-	-
ENSRNOG00000050049	AABR07009787.1	2[-]112358918-112368557	0	0	0	0	0	0	AABR07009787.1	-	-	-	-
ENSRNOG00000056392	AABR07009824.1	2[+]113907591-113956809	0	0	0	0	0	0	AABR07009824.1	-	-	-	-
ENSRNOG00000041503	AABR07009833.1	2[-]114271610-114271673	0	0	0	0	0	0	AABR07009833.1	-	-	-	-
ENSRNOG00000061630	AABR07009834.1	2[+]114386019-114386354	0.086915	0	0.091253	0.601866	0.352018	0.418949	AABR07009834.1	-	GO:0016310;GO:0016301	-	-
ENSRNOG00000050470	AABR07009890.1	2[-]115158186-115161666	0	0	0	0	0	0	AABR07009890.1	-	GO:0050911;GO:0050896;GO:0007608;GO:0007186;GO:0005549;GO:0004984;GO:0004930;GO:0007165;GO:0004871;GO:0016021;GO:0005886;GO:0016020	K04257-ko04740 Olfactory transduction	-
ENSRNOG00000049341	AABR07009919.1	2[+]116993002-116993078	0	0	0	0	0	0	AABR07009919.1	-	-	-	-
ENSRNOG00000053963	AABR07009927.1	2[+]117479750-117479836	0	0	0	0	0	0	AABR07009927.1	-	-	-	-
ENSRNOG00000011640	AABR07009931.1	2[-]117666294-117666683	0	0	0	0	0	0	AABR07009931.1	-	-	-	-
ENSRNOG00000053688	AABR07009965.1	2[+]118746333-118746753	0	0	0.336831	0.123252	0.251537	0.215868	AABR07009965.1	-	GO:0016021;GO:0016020	-	-
ENSRNOG00000038552	AABR07009978.1	2[-]119139757-119140110	0.345605	0.161512	0.335102	0.688423	0.334711	0.350491	AABR07009978.1	-	-	-	-
ENSRNOG00000056289	AABR07009984.1	2[+]119558538-119561052	0	0	0	0	0	0	AABR07009984.1	-	-	-	-
ENSRNOG00000055301	AABR07009986.1	2[+]119654821-119658017	0	0	0	0	0	0	AABR07009986.1	-	-	-	-
ENSRNOG00000041989	AABR07010030.1	2[+]121153485-121153563	0	0	0	0	0	0	AABR07010030.1	-	-	-	-
ENSRNOG00000055532	AABR07010031.1	2[+]121233947-121243685	0	0	0	0	0	0	AABR07010031.1	-	-	-	-
ENSRNOG00000053304	AABR07010033.1	2[-]121567705-121570287	0	0	0	0	0	0	AABR07010033.1	-	-	-	-
ENSRNOG00000052290	AABR07010040.1	2[-]121898756-121901107	0	0	0	0	0	0	AABR07010040.1	-	-	-	-
ENSRNOG00000055732	AABR07010040.2	2[-]121842312-121855476	0	0	0	0	0	0	AABR07010040.2	-	-	-	-
ENSRNOG00000060371	AABR07010040.3	2[-]121772714-121786011	0	0	0	0	0	0	AABR07010040.3	-	-	-	-
ENSRNOG00000040440	AABR07010061.1	2[+]122190598-122190731	0	0	0	0	0	0	AABR07010061.1	-	-	-	-
ENSRNOG00000054039	AABR07010085.1	2[+]122690278-122694271	0	0	0	0	0	0	AABR07010085.1	-	-	-	-
ENSRNOG00000048488	AABR07010107.1	2[+]123870321-123870438	0	0	0	0	0	0	AABR07010107.1	-	-	-	-
ENSRNOG00000055621	AABR07010107.2	2[+]123906633-123907598	0	0	0	0	0	0	AABR07010107.2	-	-	-	-
ENSRNOG00000059906	AABR07010121.1	2[+]124696796-124702737	0	0	0	0	0	0	AABR07010121.1	-	-	-	-
ENSRNOG00000052110	AABR07010153.1	2[-]126933410-126934746	0	0	0	0	0	0	AABR07010153.1	-	-	-	-
ENSRNOG00000054869	AABR07010155.1	2[-]127248803-127249486	0	0	0	0	0	0	AABR07010155.1	-	-	-	-
ENSRNOG00000058063	AABR07010160.1	2[-]127350818-127354933	0	0	0	0	0	0	AABR07010160.1	-	-	-	-
ENSRNOG00000055930	AABR07010180.1	2[+]127971094-127979079	0	0	0	0	0	0	AABR07010180.1	-	-	-	-
ENSRNOG00000055473	AABR07010181.1	2[-]128194906-128195150	0	0	0	0	0	0	AABR07010181.1	-	-	-	-
ENSRNOG00000059781	AABR07010183.1	2[+]128381218-128382191	0	0	0	0	0	0	AABR07010183.1	-	-	-	-
ENSRNOG00000059606	AABR07010231.1	2[-]129489008-129490588	0	0	0	0	0	0	AABR07010231.1	-	-	-	-
ENSRNOG00000052009	AABR07010306.1	2[-]131957137-131957331	0	0	0	0	0	0	AABR07010306.1	-	-	-	-
ENSRNOG00000054694	AABR07010330.1	2[-]132335056-132346974	0	0	0	0	0	0	AABR07010330.1	-	-	-	-
ENSRNOG00000060192	AABR07010330.2	2[-]132347041-132353117	0	0	0	0	0	0	AABR07010330.2	-	-	-	-
ENSRNOG00000058524	AABR07010332.1	2[-]132490612-132496152	0	0	0	0	0	0	AABR07010332.1	-	-	-	-
ENSRNOG00000053123	AABR07010342.1	2[+]132846190-132847743	0	0	0	0	0	0	AABR07010342.1	-	-	-	-
ENSRNOG00000059009	AABR07010358.1	2[+]133108524-133114397	0	0	0	0	0	0	AABR07010358.1	-	-	-	-
ENSRNOG00000054361	AABR07010370.1	2[+]133289408-133290522	0	0.005544	0	0	0	0	AABR07010370.1	-	-	-	-
ENSRNOG00000052107	AABR07010385.1	2[+]133880768-133882432	0	0	0	0	0	0	AABR07010385.1	-	-	-	-
ENSRNOG00000049767	AABR07010421.1	2[-]134953738-134954280	0	0	0	0	0	0	AABR07010421.1	-	-	-	-
ENSRNOG00000061443	AABR07010460.1	2[+]136828020-136829771	0.031782	0.27249	0.154781	0.36172	0.529221	0.260293	AABR07010460.1	-	-	-	-
ENSRNOG00000052002	AABR07010468.1	2[-]136903813-136992193	0	0	0	0	0	0	AABR07010468.1	-	-	-	-
ENSRNOG00000057358	AABR07010476.1	2[-]137148660-137153551	0	0	0	0	0	0	AABR07010476.1	-	-	-	-
ENSRNOG00000059233	AABR07010500.1	2[-]137453712-137467626	0	0	0	0	0	0	AABR07010500.1	-	-	-	-
ENSRNOG00000051733	AABR07010502.1	2[-]137472657-137473840	0	0	0	0	0	0	AABR07010502.1	-	-	-	-
ENSRNOG00000055377	AABR07010550.1	2[+]139942255-139945396	0	0	0	0	0	0	AABR07010550.1	-	-	-	-
ENSRNOG00000046865	AABR07010554.1	2[+]140207698-140207764	0	0	0	0	0	0	AABR07010554.1	-	-	-	-
ENSRNOG00000048907	AABR07010563.1	2[-]140734138-140734885	0.313639	0.255232	0.073368	0.515933	0.624827	0.361422	AABR07010563.1	-	-	-	-
ENSRNOG00000058402	AABR07010570.1	2[+]140805601-140806252	0.754575	0.380541	0.381178	0.640989	0.326208	0.446517	AABR07010570.1	-	-	-	-
ENSRNOG00000051881	AABR07010575.1	2[-]141078446-141078878	0	0	0	0	0	0	AABR07010575.1	-	-	-	-
ENSRNOG00000055814	AABR07010583.1	2[+]141422749-141423400	0.345337	0.334048	0.235709	0.461447	0.326208	0.340059	AABR07010583.1	-	-	-	-
ENSRNOG00000059063	AABR07010585.1	2[+]141576443-141578710	0	0	0	0	0	0	AABR07010585.1	-	-	-	-
ENSRNOG00000054842	AABR07010587.1	2[+]141637261-141640437	0	0	0	0	0	0	AABR07010587.1	-	-	-	-
ENSRNOG00000058636	AABR07010589.1	2[+]141863838-141863912	0	0	0	0	0	0	AABR07010589.1	-	-	-	-
ENSRNOG00000053561	AABR07010592.1	2[+]142167376-142168561	0	0	0	0	0	0	AABR07010592.1	-	-	-	-
ENSRNOG00000059218	AABR07010592.2	2[-]142079273-142084877	0	0	0	0	0	0	AABR07010592.2	-	-	-	-
ENSRNOG00000062087	AABR07010601.1	2[-]142731871-142732718	0.283315	0.254445	0.166389	0.019813	0.183113	0	AABR07010601.1	-	-	-	-
ENSRNOG00000051802	AABR07010609.1	2[+]143404985-143406099	0	0	0	0.025244	0	0	AABR07010609.1	-	-	-	-
ENSRNOG00000058331	AABR07010609.2	2[-]143347466-143357772	0	0	0	0	0	0	AABR07010609.2	-	-	-	-
ENSRNOG00000055580	AABR07010620.1	2[-]144173295-144178776	0.026474	0.014245	0	0	0	0.030067	AABR07010620.1	-	-	-	-
ENSRNOG00000036425	AABR07010633.1	2[+]144877144-144877229	0	0	0	0	0	0	AABR07010633.1	-	-	-	-
ENSRNOG00000055760	AABR07010649.1	2[+]145936827-145937813	29.7598	23.4749	28.7281	10.6046	10.4465	12.316	AABR07010649.1	-	-	-	-
ENSRNOG00000054545	AABR07010672.1	2[+]147006830-147014015	0	0	0	0	0	0	AABR07010672.1	-	-	-	-
ENSRNOG00000047765	AABR07010682.1	2[+]147203437-147208391	0	0	0	0.003496	0	0.007838	AABR07010682.1	-	-	-	-
ENSRNOG00000032715	AABR07010705.1	2[+]148262110-148263223	0.188749	0.188557	0.107201	0.623446	0.829072	0.472692	AABR07010705.1	-	GO:0032259;GO:0008168;GO:0016740;GO:0018024;GO:0034968	K11428-ko00310 Lysine degradation	-
ENSRNOG00000049703	AABR07010706.1	2[-]148386103-148386176	0	0	0	0	0	0	AABR07010706.1	-	-	-	-
ENSRNOG00000060053	AABR07010710.1	2[-]148568092-148568902	0	0	0	0	0	0	AABR07010710.1	-	-	-	-
ENSRNOG00000058650	AABR07010718.1	2[+]149090379-149096596	0	0	0	0	0	0	AABR07010718.1	-	-	-	-
ENSRNOG00000050241	AABR07010747.1	2[+]150013327-150023914	0	0	0	0	0	0	AABR07010747.1	-	GO:0016787;GO:0008152;GO:0009056	-	KOG1515-Arylacetamide deacetylase[V]
ENSRNOG00000061744	AABR07010760.1	2[+]150464352-150477392	0	0	0	0	0	0	AABR07010760.1	-	-	-	-
ENSRNOG00000055189	AABR07010763.1	2[+]150686471-150689669	0	0	0	0	0	0	AABR07010763.1	-	-	-	-
ENSRNOG00000058839	AABR07010763.2	2[-]150565948-150610745	0	0	0	0	0	0	AABR07010763.2	-	-	-	-
ENSRNOG00000052971	AABR07010777.1	2[-]151289736-151314629	0	0.122734	0	0.19597	0	0	AABR07010777.1	-	-	-	-
ENSRNOG00000053939	AABR07010787.1	2[-]151683995-151684490	0.007458	0	0	0	0	0.059834	AABR07010787.1	-	-	-	-
ENSRNOG00000047443	AABR07010840.1	2[-]153140379-153140894	0	0	0	0	0	0	AABR07010840.1	-	GO:0003735;GO:0005840;GO:0006412;GO:0005622;GO:0022625	-	KOG1696-60s ribosomal protein L19[J]
ENSRNOG00000052016	AABR07010868.1	2[-]154030237-154033351	0	0	0	0	0	0	AABR07010868.1	-	-	-	-
ENSRNOG00000058505	AABR07010873.1	2[-]154154637-154154696	0	0	0	0	0	0	AABR07010873.1	-	-	-	-
ENSRNOG00000051664	AABR07010878.1	2[+]154496703-154502221	0	0	0	0	0	0	AABR07010878.1	-	-	-	-
ENSRNOG00000051752	AABR07010894.1	2[+]154904750-154911839	0	0	0	0	0	0	AABR07010894.1	-	-	-	-
ENSRNOG00000050505	AABR07010919.1	2[-]155175499-155176260	0	0	0	0	0	0	AABR07010919.1	-	GO:0007276	-	-
ENSRNOG00000053917	AABR07010935.1	2[+]155300539-155303818	0	0	0	0	0	0	AABR07010935.1	-	-	-	-
ENSRNOG00000056299	AABR07010944.1	2[+]155555840-155556266	0	0	0	0	0	0	AABR07010944.1	-	-	-	-
ENSRNOG00000057008	AABR07010985.1	2[-]156302569-156353036	0	0	0	0	0	0.03244	AABR07010985.1	-	-	-	-
ENSRNOG00000051495	AABR07010986.1	2[-]156399129-156406032	0	0	0	0	0	0	AABR07010986.1	-	-	-	-
ENSRNOG00000054340	AABR07011013.1	2[-]156622959-156683778	0.071007	0.037348	0	0	0.172592	0.024784	AABR07011013.1	-	-	-	-
ENSRNOG00000059120	AABR07011031.1	2[-]156792500-156807305	0	0	0	0	0.091185	0	AABR07011031.1	uncharacterized protein LOC302022 [Source:RefSeq peptide;Acc:NP_001121002]	-	-	-
ENSRNOG00000057289	AABR07011084.1	2[+]157359096-157360173	0	0	0	0	0	0	AABR07011084.1	-	-	-	-
ENSRNOG00000060521	AABR07011084.2	2[+]157392278-157421379	0	0	0	0	0	0	AABR07011084.2	-	-	-	-
ENSRNOG00000054441	AABR07011085.1	2[+]157446434-157446572	0	0	0	0	0.141624	0	AABR07011085.1	-	-	-	-
ENSRNOG00000054942	AABR07011088.1	2[+]157634277-157635794	0	0	0	0	0	0	AABR07011088.1	-	-	-	-
ENSRNOG00000056030	AABR07011090.1	2[-]157723983-157724078	0	0	0	0	0	0	AABR07011090.1	-	-	-	-
ENSRNOG00000047819	AABR07011117.1	2[-]158455348-158455612	0	0	0	0	0	0	AABR07011117.1	-	-	-	-
ENSRNOG00000053128	AABR07011127.1	2[-]158791465-158795323	0	0	0	0	0	0	AABR07011127.1	-	-	-	-
ENSRNOG00000059427	AABR07011145.1	2[-]158963642-158978248	0	0	0	0	0	0	AABR07011145.1	-	-	-	-
ENSRNOG00000054349	AABR07011152.1	2[+]159138758-159139094	0	0	0	0	0	0	AABR07011152.1	-	-	-	-
ENSRNOG00000046074	AABR07011278.1	2[+]160291450-160292238	0	0	0	0	0	0	AABR07011278.1	-	GO:0003735;GO:0005840;GO:0006412;GO:0005622;GO:0022625	-	KOG1696-60s ribosomal protein L19[J]
ENSRNOG00000058603	AABR07011434.1	2[+]162021679-162022842	0	0	0	0	0	0	AABR07011434.1	-	-	-	-
ENSRNOG00000048715	AABR07011500.1	2[+]162745853-162745929	0	0	0	0	0	0	AABR07011500.1	-	-	-	-
ENSRNOG00000061049	AABR07011512.1	2[+]162986652-162988903	0	0	0	0	0	0	AABR07011512.1	-	-	-	-
ENSRNOG00000049459	AABR07011545.1	2[-]163321778-163341610	0	0	0	0	0	0.132207	AABR07011545.1	-	-	-	-
ENSRNOG00000054490	AABR07011629.1	2[+]164864184-164864286	0	0	0	0	0	0	AABR07011629.1	-	-	-	-
ENSRNOG00000028561	AABR07011672.1	2[-]165486617-165487190	0	0	0	0	0	0	AABR07011672.1	-	-	-	-
ENSRNOG00000058126	AABR07011682.1	2[-]165917470-165931558	0.427504	0.55233	0.42081	0.518802	0.309959	0.787592	AABR07011682.1	-	-	-	-
ENSRNOG00000054429	AABR07011697.1	2[-]166317979-166319816	0.024389	0.038224	0.023952	0.037798	0.051142	0.068381	AABR07011697.1	-	-	-	-
ENSRNOG00000028120	AABR07011698.1	2[-]166330579-166331689	0.04749	0	0.061423	0	0	0.087875	AABR07011698.1	-	-	-	-
ENSRNOG00000057979	AABR07011700.1	2[+]166475070-166476119	0	0	0	0.00264	0	0	AABR07011700.1	-	GO:0003727;GO:0032197;GO:0030529	-	-
ENSRNOG00000048557	AABR07011708.1	2[+]166850492-166850592	0	0	0	0	0	0	AABR07011708.1	-	-	-	-
ENSRNOG00000061317	AABR07011733.1	2[-]167606660-167607919	0	0	0	0.018422	0	0	AABR07011733.1	-	GO:0003727;GO:0032197;GO:0030529	-	-
ENSRNOG00000061747	AABR07011744.1	2[-]167877956-167892261	0	0	0	0	0	0	AABR07011744.1	-	-	-	-
ENSRNOG00000053955	AABR07011746.1	2[+]167987370-167996374	0	0	0	0	0	0	AABR07011746.1	-	-	-	-
ENSRNOG00000056204	AABR07011841.1	2[+]171693040-171693628	0	0	0	0	0	0	AABR07011841.1	-	-	-	-
ENSRNOG00000045839	AABR07011857.1	2[+]172891043-172896496	0	0.021073	0	0.025031	0.009704	0.01042	AABR07011857.1	-	-	-	-
ENSRNOG00000058315	AABR07011864.1	2[+]173565461-173568860	0	0	0	0	0	0	AABR07011864.1	-	-	-	-
ENSRNOG00000053028	AABR07011888.1	2[-]174254870-174306785	0	0	0	0	0	0	AABR07011888.1	-	-	-	-
ENSRNOG00000057062	AABR07011908.1	2[-]175657480-175662050	0	0	0	0	0	0	AABR07011908.1	-	-	-	-
ENSRNOG00000054050	AABR07011934.1	2[+]176663118-176705608	0	0	0	0	0	0	AABR07011934.1	-	-	-	-
ENSRNOG00000056840	AABR07011945.1	2[-]177343053-177344126	0	0	0	0	0	0	AABR07011945.1	-	-	-	-
ENSRNOG00000034093	AABR07011951.1	2[+]177651241-177653288	59.7394	55.9693	51.9438	20.4947	22.5526	21.1118	AABR07011951.1	-	GO:0005524;GO:0000166	K03283-ko03040 Spliceosome;ko04141 Protein processing in endoplasmic reticulum;ko04010 MAPK signaling pathway;ko04144 Endocytosis;ko04612 Antigen processing and presentation;ko04915 Estrogen signaling pathway;ko04213 Longevity regulating pathway - multiple species;ko05134 Legionellosis;ko05162 Measles;ko05164 Influenza A;ko05169 Epstein-Barr virus infection;ko05145 Toxoplasmosis	KOG0101-Molecular chaperones HSP70/HSC70, HSP70 superfamily[O]
ENSRNOG00000060006	AABR07011956.1	2[+]177828762-177829345	0	0	0	0	0	0	AABR07011956.1	-	-	-	-
ENSRNOG00000047434	AABR07011977.1	2[+]178868515-178868705	0	0	0	0	0	0	AABR07011977.1	-	-	-	-
ENSRNOG00000054279	AABR07011991.1	2[-]180545305-180546805	0	0	0	0	0	0	AABR07011991.1	-	-	-	-
ENSRNOG00000061272	AABR07011996.1	2[+]180878153-180883459	2.43355	2.65805	2.50396	6.23127	6.44858	6.12658	AABR07011996.1	-	-	-	-
ENSRNOG00000052251	AABR07011997.1	2[+]180921250-180929578	0	0	0	0	0	0	AABR07011997.1	-	-	-	-
ENSRNOG00000053134	AABR07012012.1	2[-]182113419-182113942	0	0	0	0	0	0	AABR07012012.1	-	-	-	-
ENSRNOG00000057849	AABR07012023.1	2[-]182712194-182717296	0	0	0	0	0	0	AABR07012023.1	-	-	-	-
ENSRNOG00000053252	AABR07012030.1	2[-]182796322-182796842	0	0	0	0	0	0	AABR07012030.1	-	-	-	-
ENSRNOG00000061763	AABR07012039.1	2[-]183250629-183250928	0	0	0	0	0	0	AABR07012039.1	-	-	-	-
ENSRNOG00000056769	AABR07012040.1	2[-]183343038-183344176	0	0	0	0	0	0	AABR07012040.1	-	-	-	-
ENSRNOG00000052191	AABR07012044.1	2[-]183601389-183601490	0	0	0	0	0	0	AABR07012044.1	-	-	-	-
ENSRNOG00000056501	AABR07012044.2	2[-]183573319-183573392	0	0	0	0	0	0	AABR07012044.2	-	-	-	-
ENSRNOG00000041243	AABR07012051.1	2[+]183959675-183959809	0	0	0	0	0	0	AABR07012051.1	-	-	-	-
ENSRNOG00000057323	AABR07012051.2	2[-]183902903-183915398	0	0	0	0	0	0	AABR07012051.2	-	-	-	-
ENSRNOG00000053340	AABR07012053.1	2[-]184138752-184144910	0	0	0	0	0	0	AABR07012053.1	-	-	-	-
ENSRNOG00000053765	AABR07012053.2	2[-]184111769-184123152	0	0	0	0	0	0	AABR07012053.2	-	-	-	-
ENSRNOG00000049530	AABR07012054.1	2[+]184230459-184231269	0.628243	0.160504	0.715818	2.4291	2.44958	2.27663	AABR07012054.1	-	GO:0016021;GO:0016020	-	-
ENSRNOG00000060178	AABR07012061.1	2[+]184597104-184599418	0	0	0	0	0	0	AABR07012061.1	-	-	-	-
ENSRNOG00000056112	AABR07012065.1	2[-]184692634-184694181	0.371999	0.626979	0.939978	0.592573	0.593044	0.420456	AABR07012065.1	-	-	-	-
ENSRNOG00000047458	AABR07012072.1	2[-]184826929-184827017	0	0	0	0	0	0	AABR07012072.1	-	-	-	-
ENSRNOG00000051552	AABR07012081.1	2[+]184915247-184917462	0	0	0	0	0	0	AABR07012081.1	-	-	-	-
ENSRNOG00000047188	AABR07012133.1	2[-]186932580-186932969	0	0	0	0	0	0	AABR07012133.1	-	-	-	-
ENSRNOG00000053596	AABR07012195.1	2[-]190505068-190506073	0	0	0	0	0	0	AABR07012195.1	-	-	-	-
ENSRNOG00000048515	AABR07012269.1	2[-]191866694-191869257	0	0	0	0	0	0	AABR07012269.1	-	-	-	-
ENSRNOG00000059604	AABR07012274.1	2[-]191984773-191986170	0	0	0	0	0	0	AABR07012274.1	-	-	-	-
ENSRNOG00000061912	AABR07012276.1	2[+]192045178-192061035	0	0	0	0	0	0	AABR07012276.1	-	-	-	-
ENSRNOG00000029760	AABR07012291.1	2[-]192305560-192381716	0	0	0	0	0	0	AABR07012291.1	-	GO:0005737;GO:0001533;GO:0005198;GO:0018149;GO:0030216	-	-
ENSRNOG00000059417	AABR07012291.2	2[-]192283152-192288568	0	0	0	0	0	0	AABR07012291.2	-	GO:0001533	-	-
ENSRNOG00000052006	AABR07012295.1	2[-]192342937-192343363	0	0	0	0	0	0	AABR07012295.1	-	-	-	-
ENSRNOG00000029177	AABR07012299.1	2[+]192416615-192434072	0	0	0	0	0	0	AABR07012299.1	-	GO:0005737;GO:0001533;GO:0005198;GO:0018149;GO:0030216	-	-
ENSRNOG00000033499	AABR07012310.1	2[-]192854298-192854718	0	0	0	0	0	0	AABR07012310.1	-	-	-	-
ENSRNOG00000058195	AABR07012312.1	2[-]192941162-192941588	0	0	0	0	0	0	AABR07012312.1	-	-	-	-
ENSRNOG00000009445	AABR07012313.1	2[+]192952775-192953294	0	0	0	0	0	0	AABR07012313.1	-	-	-	-
ENSRNOG00000043111	AABR07012314.1	2[-]192978065-192978466	0	0	0	0	0	0	AABR07012314.1	-	GO:0005737;GO:0005198;GO:0018149;GO:0030216;GO:0001533;GO:0008544	-	-
ENSRNOG00000046788	AABR07012317.1	2[-]193041964-193042323	0	0	0	0	0	0	AABR07012317.1	-	GO:0005737;GO:0005198;GO:0018149;GO:0030216;GO:0001533;GO:0008544	-	-
ENSRNOG00000049173	AABR07012317.2	2[-]193051610-193063357	0	0	0	0	0	0	AABR07012317.2	-	GO:0005737;GO:0005198;GO:0018149;GO:0030216;GO:0001533;GO:0008544	-	-
ENSRNOG00000042970	AABR07012318.1	2[-]193083901-193101051	0	0	0	0	0	0	AABR07012318.1	-	GO:0008544	-	-
ENSRNOG00000046752	AABR07012323.1	2[+]193286721-193294599	0	0	0	0	0	0	AABR07012323.1	-	GO:0005737;GO:0005198;GO:0018149;GO:0030216;GO:0001533;GO:0008544	-	-
ENSRNOG00000009602	AABR07012329.1	2[+]193572053-193572829	0	0	0	0	0	0	AABR07012329.1	-	GO:0005198	-	-
ENSRNOG00000053250	AABR07012331.1	2[+]193627243-193634181	0	0	0	0	0	0	AABR07012331.1	-	GO:0005509;GO:0046872;GO:0001533;GO:0046914	-	-
ENSRNOG00000050472	AABR07012342.1	2[-]194084081-194084716	0	0	0	0	0	0	AABR07012342.1	-	GO:0005737;GO:0005634;GO:0042787;GO:0031625;GO:0030162;GO:0043161;GO:0019005	-	-
ENSRNOG00000051678	AABR07012475.1	2[-]196582275-196582997	0	0	0	0	0	0	AABR07012475.1	-	-	-	-
ENSRNOG00000052421	AABR07012475.2	2[+]196587206-196591324	0.380336	0.250139	0.233746	0.80153	1.27351	1.08813	AABR07012475.2	-	-	-	-
ENSRNOG00000052818	AABR07012492.1	2[+]196808213-196808613	0	0	0	0	0	0	AABR07012492.1	-	-	-	-
ENSRNOG00000049706	AABR07012575.1	2[+]197784281-197784375	0	0	0	0.741795	0	0	AABR07012575.1	-	-	-	-
ENSRNOG00000060042	AABR07012582.1	2[+]198360335-198360475	0	0	0	0	0	0	AABR07012582.1	-	-	-	-
ENSRNOG00000060619	AABR07012582.2	2[+]198381808-198381945	0	0	0	0	0	0	AABR07012582.2	-	-	-	-
ENSRNOG00000054132	AABR07012583.1	2[-]198389054-198389191	0	0	0	0	0	0	AABR07012583.1	-	-	-	-
ENSRNOG00000002223	AABR07012587.1	2[-]198591407-198591655	0	0	0	0	0	0	AABR07012587.1	-	-	-	-
ENSRNOG00000059842	AABR07012588.1	2[+]198601723-198601963	0	0	0	0	0	0	AABR07012588.1	-	-	-	-
ENSRNOG00000037223	AABR07012592.1	2[-]198682514-198682708	0	0	0	0	0	0	AABR07012592.1	-	-	-	-
ENSRNOG00000058608	AABR07012613.1	2[-]199433018-199439618	0	0	0	0	0	0	AABR07012613.1	-	-	-	-
ENSRNOG00000045806	AABR07012616.1	2[-]199562490-199563386	0	0	0	0	0	0	AABR07012616.1	-	GO:0050911;GO:0050896;GO:0007608;GO:0007186;GO:0005549;GO:0004984;GO:0004930;GO:0007165;GO:0004871;GO:0016021;GO:0005886;GO:0016020	K04257-ko04740 Olfactory transduction	-
ENSRNOG00000053190	AABR07012635.1	2[-]200806056-200820379	0.456513	0.095417	0.302317	17.9319	19.9688	13.1902	AABR07012635.1	-	-	-	-
ENSRNOG00000051856	AABR07012640.1	2[+]201019113-201022159	0	0	0	0	0	0	AABR07012640.1	-	-	-	-
ENSRNOG00000045536	AABR07012658.1	2[-]201677460-201678244	0	0	0	0	0	0	AABR07012658.1	-	GO:0007276	-	-
ENSRNOG00000055403	AABR07012702.1	2[-]202664165-202665860	0	0	0	0	0	0	AABR07012702.1	-	-	-	-
ENSRNOG00000054483	AABR07012711.1	2[+]203048516-203050284	0	0	0	0	0.09838	0	AABR07012711.1	-	-	-	-
ENSRNOG00000053048	AABR07012728.1	2[+]204033548-204034066	0	0	0	0	0	0	AABR07012728.1	-	-	-	-
ENSRNOG00000061513	AABR07012728.2	2[+]204039338-204042981	0	0	0	0	0	0	AABR07012728.2	-	-	-	-
ENSRNOG00000052852	AABR07012752.1	2[+]205686929-205689323	0	0	0	0	0	0	AABR07012752.1	-	-	-	-
ENSRNOG00000060909	AABR07012757.1	2[-]206157042-206162864	0	0	0	0	0	0	AABR07012757.1	-	-	-	-
ENSRNOG00000055862	AABR07012762.1	2[-]206752980-206778070	0	0	0	0	0	0	AABR07012762.1	-	-	-	-
ENSRNOG00000057707	AABR07012763.1	2[-]206828273-206842724	0	0	0	0	0	0	AABR07012763.1	-	-	-	-
ENSRNOG00000052078	AABR07012774.1	2[+]207845492-207846886	0	0	0	0	0	0	AABR07012774.1	-	-	-	-
ENSRNOG00000055255	AABR07012774.2	2[+]207870611-207871683	0	0	0	0	0	0	AABR07012774.2	-	-	-	-
ENSRNOG00000053044	AABR07012775.1	2[-]208225406-208225888	0.093194	0.073688	0.139113	0.012585	0.246716	0.121546	AABR07012775.1	-	GO:0003735;GO:0005840;GO:0006412;GO:0005622;GO:0022625	-	KOG1732-60S ribosomal protein L21[J]
ENSRNOG00000017695	AABR07012795.1	2[+]208738132-208739047	36.5569	33.2028	29.4132	66.6056	80.5676	68.6715	AABR07012795.1	-	GO:0045454;GO:0051920;GO:0016209;GO:0055114;GO:0016491;GO:0005623;GO:0098869	K13279-ko04146 Peroxisome	-
ENSRNOG00000055404	AABR07012826.1	2[+]209661244-209779614	0	0	0	0	0	0	AABR07012826.1	-	-	-	-
ENSRNOG00000056341	AABR07012843.1	2[-]210337944-210338457	0	0	0	0	0	0	AABR07012843.1	-	-	-	-
ENSRNOG00000030847	AABR07012868.1	2[+]212435728-212437192	0	0	0	0	0	0	AABR07012868.1	-	GO:0003735;GO:0005840;GO:0006412;GO:0005622;GO:0005763;GO:0032543	K02961-ko03010 Ribosome	KOG3447-Mitochondrial/chloroplast ribosomal S17-like protein[J]
ENSRNOG00000052614	AABR07012884.1	2[+]213686927-213687890	0	0	0	0	0	0	AABR07012884.1	-	-	-	-
ENSRNOG00000057573	AABR07012943.1	2[+]216061377-216062373	0	0	0	0	0	0	AABR07012943.1	-	-	-	-
ENSRNOG00000048240	AABR07013019.1	2[+]218920393-218920446	0	0	0	0	0	0	AABR07013019.1	-	-	-	-
ENSRNOG00000052101	AABR07013023.1	2[+]219059772-219065247	0	0	0	0	0	0	AABR07013023.1	-	-	-	-
ENSRNOG00000060159	AABR07013057.1	2[-]220645276-220663305	0	0	0	0	0	0	AABR07013057.1	-	-	-	-
ENSRNOG00000055846	AABR07013065.1	2[-]220817080-220838905	0	0	0	0	0	0	AABR07013065.1	-	-	-	-
ENSRNOG00000054507	AABR07013070.1	2[+]221230393-221237285	0	0	0	0	0	0	AABR07013070.1	-	-	-	-
ENSRNOG00000048332	AABR07013073.1	2[+]221658996-221659105	0	0	0	0	0	0	AABR07013073.1	-	-	-	-
ENSRNOG00000056395	AABR07013073.2	2[+]221510318-221512410	0	0	0	0	0	0	AABR07013073.2	-	-	-	-
ENSRNOG00000060752	AABR07013073.3	2[-]221334902-221339718	0	0	0	0	0	0	AABR07013073.3	-	-	-	-
ENSRNOG00000061165	AABR07013073.4	2[+]221659198-221659511	0	0	0	0	0	0	AABR07013073.4	-	-	-	-
ENSRNOG00000053591	AABR07013085.1	2[+]222721245-222783356	0	0	0	0	0	0	AABR07013085.1	-	-	-	-
ENSRNOG00000023365	AABR07013086.1	2[+]222792999-222793876	0	0	0	0.321207	0	0	AABR07013086.1	-	GO:0016620;GO:0055114	-	KOG0657-Glyceraldehyde 3-phosphate dehydrogenase[G]
ENSRNOG00000049260	AABR07013095.1	2[-]222935650-222935973	0	0	0	0	0	0	AABR07013095.1	-	-	-	-
ENSRNOG00000030575	AABR07013111.1	2[+]223029559-223045185	0.132333	0.767348	0.094059	0	0	0	AABR07013111.1	-	GO:0005615;GO:0006955;GO:0002377	-	-
ENSRNOG00000053956	AABR07013116.1	2[+]223121410-223121883	0	0	0.080919	0.099711	0	0	AABR07013116.1	-	GO:0005615;GO:0006955;GO:0002377	-	-
ENSRNOG00000051918	AABR07013123.1	2[+]223607485-223609811	0	0	0	0	0	0	AABR07013123.1	-	-	-	-
ENSRNOG00000056951	AABR07013140.1	2[+]224408346-224418974	0	0	0	0	0	0	AABR07013140.1	-	-	-	-
ENSRNOG00000053852	AABR07013147.1	2[+]224712766-224712972	0	0.161946	0.121032	0.42353	0.290847	0.568	AABR07013147.1	-	GO:0016021;GO:0016020	-	-
ENSRNOG00000051378	AABR07013154.1	2[-]225052612-225052700	0	0	0	0	0	0	AABR07013154.1	-	-	-	-
ENSRNOG00000058371	AABR07013154.2	2[-]225025736-225025972	0.107614	0	0	0	0	0.030792	AABR07013154.2	-	-	-	-
ENSRNOG00000051962	AABR07013157.1	2[-]225170643-225171830	0	0	0	0	0	0	AABR07013157.1	-	-	-	-
ENSRNOG00000052653	AABR07013157.2	2[+]225143049-225144251	0	0	0	0	0	0	AABR07013157.2	-	-	-	-
ENSRNOG00000060844	AABR07013165.1	2[-]225801121-225803115	0	0.08253	0.30196	0	0	0	AABR07013165.1	-	-	-	-
ENSRNOG00000060865	AABR07013167.1	2[-]225931662-225937303	0	0	0	0	0	0	AABR07013167.1	-	-	-	-
ENSRNOG00000030491	AABR07013200.1	2[+]226825635-226826642	0	0	0	0	0	0	AABR07013200.1	-	GO:0016620;GO:0055114	-	-
ENSRNOG00000058153	AABR07013202.1	2[-]227132853-227145185	0.136192	0.035841	0.075882	0.534576	0.339109	0.165744	AABR07013202.1	-	GO:0016579;GO:0036459	-	-
ENSRNOG00000000001	AABR07013255.1	2[+]230660664-230662084	0	0	0	0.137509	0.069512	0	AABR07013255.1	-	-	-	-
ENSRNOG00000048336	AABR07013288.1	2[+]231875455-231875526	0	0	0	0	0	0	AABR07013288.1	-	-	-	-
ENSRNOG00000048974	AABR07013288.2	2[+]231874974-231875047	0	0	0	0	0	0	AABR07013288.2	-	-	-	-
ENSRNOG00000050314	AABR07013288.3	2[+]231875226-231875294	0	0	0	0	0	0	AABR07013288.3	-	-	-	-
ENSRNOG00000053387	AABR07013288.4	2[+]231941794-231943497	0	0	0	0.464101	0.23631	0.465537	AABR07013288.4	-	-	-	-
ENSRNOG00000055038	AABR07013302.1	2[-]232372927-232373409	2.04322	1.05259	1.47023	0.747066	2.01048	1.13021	AABR07013302.1	-	GO:0003735;GO:0005840;GO:0006412;GO:0005622;GO:0022625	K02889-ko03010 Ribosome	KOG1732-60S ribosomal protein L21[J]
ENSRNOG00000055380	AABR07013304.1	2[-]232636943-232651058	0	0	0	0	0	0	AABR07013304.1	-	-	-	-
ENSRNOG00000060298	AABR07013314.1	2[+]232988616-232993794	0	0	0	0	0	0	AABR07013314.1	-	-	-	-
ENSRNOG00000054971	AABR07013323.1	2[-]233443716-233449216	0	0	0	0	0	0	AABR07013323.1	-	-	-	-
ENSRNOG00000051979	AABR07013324.1	2[-]233538755-233542079	0	0	0	0	0	0	AABR07013324.1	-	-	-	-
ENSRNOG00000058246	AABR07013365.1	2[-]234491321-234493178	0	0	0	0	0	0	AABR07013365.1	-	-	-	-
ENSRNOG00000047992	AABR07013410.1	2[-]235950793-235951275	0	0	0	0	0	0	AABR07013410.1	-	GO:0003735;GO:0005840;GO:0006412;GO:0005622;GO:0022625	-	KOG1732-60S ribosomal protein L21[J]
ENSRNOG00000052248	AABR07013410.2	2[+]236007055-236011129	0	0	0	0	0	0	AABR07013410.2	-	-	-	-
ENSRNOG00000055227	AABR07013410.3	2[+]236004932-236005928	0	0	0	0	0	0	AABR07013410.3	-	-	-	-
ENSRNOG00000059757	AABR07013410.4	2[-]236044711-236058120	0	0	0	0	0	0	AABR07013410.4	-	-	-	-
ENSRNOG00000055035	AABR07013412.1	2[-]236149639-236149971	0	0	0	0	0	0	AABR07013412.1	-	GO:0016021;GO:0016020	-	-
ENSRNOG00000050075	AABR07013425.1	2[-]236822072-236823145	0	0	0	0.004385	0	0	AABR07013425.1	-	GO:0003727;GO:0032197;GO:0030529	-	-
ENSRNOG00000059205	AABR07013435.1	2[-]237339469-237343454	0	0	0	0	0	0	AABR07013435.1	-	-	-	-
ENSRNOG00000061584	AABR07013439.1	2[+]237482444-237509606	0	0	0	0	0	0	AABR07013439.1	-	-	-	-
ENSRNOG00000054662	AABR07013453.1	2[+]237974910-237976595	0	0	0	0	0	0	AABR07013453.1	-	-	-	-
ENSRNOG00000041898	AABR07013477.1	2[-]239208476-239208648	0	0	0	0	0	0	AABR07013477.1	-	-	-	-
ENSRNOG00000059314	AABR07013477.2	2[+]239058041-239067584	0	0	0	0	0	0	AABR07013477.2	-	-	-	-
ENSRNOG00000041792	AABR07013488.1	2[-]239418716-239418794	0	0	0	0	0	0	AABR07013488.1	-	-	-	-
ENSRNOG00000057646	AABR07013488.2	2[+]239579652-239598402	0	0	0	0	0	0	AABR07013488.2	-	-	-	-
ENSRNOG00000036421	AABR07013539.1	2[+]242457405-242457500	0	0	0	0	0	0	AABR07013539.1	-	-	-	-
ENSRNOG00000054761	AABR07013550.1	2[-]243343169-243345676	0	0	0	0	0	0	AABR07013550.1	-	-	-	-
ENSRNOG00000051702	AABR07013558.1	2[-]244026369-244034538	0	0	0	0	0	0	AABR07013558.1	-	-	-	-
ENSRNOG00000056490	AABR07013566.1	2[+]244541833-244550309	0	0	0	0	0.007422	0	AABR07013566.1	-	-	-	-
ENSRNOG00000051598	AABR07013583.1	2[-]244926294-244931817	0.009297	0.060909	0.004361	0.070378	0.0285	0.053806	AABR07013583.1	-	-	-	-
ENSRNOG00000036420	AABR07013586.1	2[+]245137009-245137116	0	0	0	0	0	0	AABR07013586.1	-	-	-	-
ENSRNOG00000060967	AABR07013591.1	2[-]245325863-245325980	0	0	0	0	0	0	AABR07013591.1	-	-	-	-
ENSRNOG00000055914	AABR07013639.1	2[+]248079345-248081918	0	0	0	0	0	0	AABR07013639.1	-	-	-	-
ENSRNOG00000059088	AABR07013653.1	2[+]248544104-248545549	0	0	0	0	0.100589	0.100107	AABR07013653.1	-	-	-	-
ENSRNOG00000061151	AABR07013654.1	2[+]248579506-248580623	0	0	0	0	0	0	AABR07013654.1	-	-	-	-
ENSRNOG00000058016	AABR07013672.1	2[+]248922891-248924641	0	0	0	0	0	0	AABR07013672.1	-	-	-	-
ENSRNOG00000053087	AABR07013676.1	2[+]249514527-249515287	0	0	0	0	0	0	AABR07013676.1	-	-	-	-
ENSRNOG00000057293	AABR07013676.2	2[-]249527973-249530099	0	0	0	0	0	0	AABR07013676.2	-	-	-	-
ENSRNOG00000055290	AABR07013686.1	2[-]250349516-250352466	0	0	0	0	0	0	AABR07013686.1	-	-	-	-
ENSRNOG00000054579	AABR07013689.1	2[+]250450371-250465561	0.018058	0	0	0	0.055196	0	AABR07013689.1	-	-	-	-
ENSRNOG00000052331	AABR07013698.1	2[-]251179474-251181031	0	0	0	0	0	0	AABR07013698.1	-	-	-	-
ENSRNOG00000058696	AABR07013701.1	2[+]251534535-251534744	0.015761	0	0.130097	0	0	0.220865	AABR07013701.1	-	GO:0016021;GO:0016020	-	-
ENSRNOG00000054185	AABR07013718.1	2[-]252869425-252872402	0	0	0	0	0	0	AABR07013718.1	-	-	-	-
ENSRNOG00000057103	AABR07013724.1	2[+]253689008-253698878	0	0	0	0	0	0	AABR07013724.1	-	-	-	-
ENSRNOG00000051456	AABR07013729.1	2[+]254022079-254039326	0.452533	0.429489	0.234794	0.444588	0.607126	0.579141	AABR07013729.1	-	-	-	-
ENSRNOG00000052422	AABR07013743.1	2[-]254176197-254178108	0	0	0	0	0	0	AABR07013743.1	-	-	-	-
ENSRNOG00000059921	AABR07013746.1	2[+]254227523-254250415	0.461228	0.186758	0.501135	4.42516	4.55044	3.28698	AABR07013746.1	-	-	-	-
ENSRNOG00000051582	AABR07013747.1	2[+]254279745-254285885	0	0	0	0	0	0	AABR07013747.1	-	-	-	-
ENSRNOG00000052596	AABR07013750.1	2[+]254549682-254551357	0	0	0	0	0	0	AABR07013750.1	-	-	-	-
ENSRNOG00000057395	AABR07013762.1	2[+]255038371-255076694	0	0	0	0	0	0	AABR07013762.1	-	-	-	-
ENSRNOG00000053817	AABR07013764.1	2[-]255476431-255480556	0	0	0	0	0	0	AABR07013764.1	-	-	-	-
ENSRNOG00000060722	AABR07013764.2	2[-]255464221-255466199	0	0	0	0	0	0	AABR07013764.2	-	-	-	-
ENSRNOG00000061178	AABR07013764.3	2[-]255454934-255460656	0	0	0	0	0	0	AABR07013764.3	-	-	-	-
ENSRNOG00000048082	AABR07013776.1	2[-]256154141-256154584	0.016663	0	0	0	0	0.014975	AABR07013776.1	-	GO:0005509	-	KOG0027-Calmodulin and related proteins (EF-Hand superfamily)[T]
ENSRNOG00000061028	AABR07013784.1	2[+]256567839-256569025	0	0	0	0	0	0	AABR07013784.1	-	-	-	-
ENSRNOG00000055552	AABR07013788.1	2[+]256760823-256767798	0	0	0	0	0	0	AABR07013788.1	-	-	-	-
ENSRNOG00000030563	AABR07013798.1	2[+]257295193-257295534	0	0	0	0	0	0	AABR07013798.1	-	GO:0003735;GO:0002181;GO:0022625;GO:0000463	-	KOG3184-60S ribosomal protein L7[J]
ENSRNOG00000050050	AABR07013801.1	2[+]257376551-257376863	0	0	0	0	0	0	AABR07013801.1	-	-	-	-
ENSRNOG00000058222	AABR07013802.1	2[+]257462312-257462651	2.66383	2.22961	2.50817	1.70528	2.439	1.43476	AABR07013802.1	-	-	-	-
ENSRNOG00000059248	AABR07013841.1	2[+]258783091-258784044	0	0	0	0	0	0	AABR07013841.1	-	-	-	-
ENSRNOG00000060973	AABR07013843.1	2[-]259149018-259150479	0	0	0	0	0	0	AABR07013843.1	-	-	-	-
ENSRNOG00000056191	AABR07013907.1	2[+]262385383-262387044	0	0	0	0	0	0	AABR07013907.1	-	-	-	-
ENSRNOG00000049917	AABR07013911.1	2[-]262679147-262679246	0	0	0	0	0	0	AABR07013911.1	-	-	-	-
ENSRNOG00000058005	AABR07013914.1	2[+]262799719-262803982	0	0	0	0	0	0	AABR07013914.1	-	-	-	-
ENSRNOG00000051010	AABR07013918.1	2[+]262917874-262917951	0	0	0	0	0.206111	0	AABR07013918.1	-	-	-	-
ENSRNOG00000048305	AABR07013922.1	2[-]263628021-263633542	0	0	0	0	0	0.001043	AABR07013922.1	-	-	-	-
ENSRNOG00000051869	AABR07013931.1	2[-]264153498-264153659	0	0	0	0	0	0	AABR07013931.1	-	-	-	-
ENSRNOG00000053997	AABR07013931.2	2[+]264180085-264180291	0	0	0	0	0	0	AABR07013931.2	-	-	-	-
ENSRNOG00000061742	AABR07013931.3	2[+]264212931-264216263	0	0	0	0	0	0	AABR07013931.3	-	-	-	-
ENSRNOG00000047582	AABR07014087.1	14[+]779169-786599	0	0	0	0	0	0	AABR07014087.1	-	GO:0007186;GO:0004930;GO:0007165;GO:0004871;GO:0016021;GO:0005886;GO:0016020	-	KOG1056-Glutamate-gated metabotropic ion channel receptor subunit GRM2 and related subunits, G-protein coupled receptor superfamily[PT]
ENSRNOG00000045591	AABR07014089.1	14[+]812382-822360	0	0	0	0	0	0	AABR07014089.1	-	GO:0007186;GO:0004930;GO:0007165;GO:0004871;GO:0016021;GO:0005886;GO:0016020	-	KOG1056-Glutamate-gated metabotropic ion channel receptor subunit GRM2 and related subunits, G-protein coupled receptor superfamily[PT]
ENSRNOG00000040213	AABR07014114.1	14[+]1355004-1355552	0	0	0	0.334853	0.25547	0.138323	AABR07014114.1	-	GO:0005622;GO:0003676;GO:0006355	-	KOG1721-FOG: Zn-finger[R]
ENSRNOG00000058018	AABR07014118.1	14[-]1438154-1440030	0	0	0	0	0	0	AABR07014118.1	-	-	-	-
ENSRNOG00000052352	AABR07014119.1	14[+]1445874-1446106	0	0	0	0	0	0	AABR07014119.1	-	-	-	-
ENSRNOG00000054857	AABR07014125.1	14[-]1517481-1529233	0	0	0	0	0	0	AABR07014125.1	-	-	-	-
ENSRNOG00000059179	AABR07014125.2	14[-]1510427-1538695	0	0	0	0	0	0	AABR07014125.2	-	-	-	-
ENSRNOG00000052854	AABR07014132.1	14[+]1690757-1696882	0	0	0	0	0	0.014333	AABR07014132.1	-	-	-	-
ENSRNOG00000059950	AABR07014158.1	14[+]3792041-3793270	0	0	0	0	0	0	AABR07014158.1	-	-	-	-
ENSRNOG00000052143	AABR07014161.1	14[+]4063728-4065280	0	0	0	0	0	0	AABR07014161.1	-	-	-	-
ENSRNOG00000055494	AABR07014161.2	14[-]3983171-3993624	0	0	0	0	0	0	AABR07014161.2	-	-	-	-
ENSRNOG00000039989	AABR07014177.1	14[+]4539160-4539612	0.001504	0	0	0	0	0	AABR07014177.1	-	-	-	-
ENSRNOG00000053826	AABR07014205.1	14[+]5495482-5508873	0	0	0	0	0	0	AABR07014205.1	-	-	-	-
ENSRNOG00000057936	AABR07014218.1	14[+]5618162-5650911	0	0	0	0	0	0	AABR07014218.1	-	-	-	-
ENSRNOG00000057207	AABR07014239.1	14[+]5837638-5838081	5.42408	7.26612	7.4709	4.34577	4.02839	6.15165	AABR07014239.1	-	-	-	-
ENSRNOG00000002130	AABR07014241.1	14[-]5857946-5859581	0	0	0	0	0	0	AABR07014241.1	-	GO:0003924;GO:0005525;GO:0000166	-	KOG2037-Guanylate-binding protein[R]
ENSRNOG00000051404	AABR07014242.1	14[-]5868637-5869080	5.19198	6.49371	6.81715	3.30785	4.34002	4.73503	AABR07014242.1	-	-	-	-
ENSRNOG00000042166	AABR07014259.1	14[+]6221085-6223394	0	0	0.007018	0	0	0	AABR07014259.1	-	GO:0005622;GO:0003676;GO:0006355	-	KOG1721-FOG: Zn-finger[R]
ENSRNOG00000051753	AABR07014272.1	14[+]6556245-6557298	0.06341	0	0.033509	0.892508	0.885758	0.767096	AABR07014272.1	-	-	-	-
ENSRNOG00000060602	AABR07014275.1	14[-]7405019-7415385	0.248989	0.289197	0.179986	0.291337	0.112709	0.151727	AABR07014275.1	-	-	-	-
ENSRNOG00000058935	AABR07014289.1	14[+]7500401-7501512	0	0	0	0	0	0	AABR07014289.1	-	-	-	-
ENSRNOG00000047391	AABR07014301.1	14[-]8065729-8065832	0	0	0	0	0	0	AABR07014301.1	-	-	-	-
ENSRNOG00000057639	AABR07014304.1	14[-]8598629-8598926	0	0	0	0.092462	0	0	AABR07014304.1	-	-	-	-
ENSRNOG00000051571	AABR07014306.1	14[+]8903269-8912630	0	0	0	0	0	0	AABR07014306.1	-	-	-	-
ENSRNOG00000053286	AABR07014317.1	14[-]9100242-9101588	0	0	0	0	0	0	AABR07014317.1	-	-	-	-
ENSRNOG00000059599	AABR07014323.1	14[+]9524787-9532596	0	0	0	0	0	0	AABR07014323.1	-	-	-	-
ENSRNOG00000057790	AABR07014328.1	14[-]9783061-9785736	0	0	0	0	0	0	AABR07014328.1	-	-	-	-
ENSRNOG00000061516	AABR07014342.1	14[-]10296465-10297482	0	0	0	0	0	0	AABR07014342.1	-	-	-	-
ENSRNOG00000057070	AABR07014350.1	14[+]10957160-10958270	0	0	0	0	0	0	AABR07014350.1	-	-	-	-
ENSRNOG00000060904	AABR07014355.1	14[-]11544842-11546314	0	0	0	0	0	0	AABR07014355.1	-	-	-	-
ENSRNOG00000048294	AABR07014384.1	14[+]13469634-13469750	0	0	0	0	0	0	AABR07014384.1	-	-	-	-
ENSRNOG00000055646	AABR07014387.1	14[+]13520905-13525003	0	0	0	0	0	0	AABR07014387.1	-	-	-	-
ENSRNOG00000051389	AABR07014424.1	14[+]15417981-15420200	0	0	0	0	0	0.03248	AABR07014424.1	-	-	-	-
ENSRNOG00000053903	AABR07014426.1	14[-]15459950-15462861	0	0	0	0	0	0	AABR07014426.1	-	GO:0043066;GO:0045892;GO:0008284;GO:0045596	-	-
ENSRNOG00000043813	AABR07014478.1	14[+]16802951-16803062	0	0	0	0	0	0	AABR07014478.1	-	-	-	-
ENSRNOG00000039548	AABR07014487.1	14[-]17809095-17809547	0	0	0	0	0	0	AABR07014487.1	-	-	-	-
ENSRNOG00000060060	AABR07014499.1	14[-]18155170-18157354	0	0	0	0	0	0	AABR07014499.1	-	-	-	-
ENSRNOG00000057178	AABR07014512.1	14[+]18844709-18846281	0	0	0	0	0	0	AABR07014512.1	-	-	-	-
ENSRNOG00000058092	AABR07014512.2	14[+]18855546-18855940	0	0	0	0	0	0	AABR07014512.2	-	-	-	-
ENSRNOG00000055589	AABR07014524.1	14[+]19281721-19281932	0	0	0	0	0	0.14458	AABR07014524.1	-	-	-	-
ENSRNOG00000049984	AABR07014547.1	14[-]21053810-21053910	0	0	0.005906	0.610099	0.946927	1.29257	AABR07014547.1	-	-	-	-
ENSRNOG00000003606	AABR07014550.1	14[+]21163840-21164295	19.1608	12.8294	12.913	6.32848	8.39915	9.60276	AABR07014550.1	-	-	-	-
ENSRNOG00000023418	AABR07014573.1	14[-]21770236-21771567	0	0	0	0	0	0	AABR07014573.1	-	-	-	-
ENSRNOG00000049119	AABR07014621.1	14[+]23804896-23804978	0	0	0	0	0.0672	0	AABR07014621.1	-	-	-	-
ENSRNOG00000052680	AABR07014630.1	14[+]23961053-23973344	0	0	0	0	0.046584	0.028758	AABR07014630.1	-	-	-	-
ENSRNOG00000060037	AABR07014638.1	14[+]24182755-24188263	0	0	0	0.31808	0.097876	0.167138	AABR07014638.1	-	-	-	-
ENSRNOG00000053415	AABR07014649.1	14[+]24842933-24877986	0	0	0	0	0	0	AABR07014649.1	-	-	-	-
ENSRNOG00000054903	AABR07014690.1	14[+]26654300-26655730	0	0	0	0	0	0	AABR07014690.1	-	-	-	-
ENSRNOG00000036377	AABR07014722.1	14[+]28075138-28075243	0	0	0	0	0	0	AABR07014722.1	-	-	-	-
ENSRNOG00000057494	AABR07014739.1	14[-]29232295-29232537	0	0	0	0	0	0	AABR07014739.1	-	GO:0005829;GO:0042147;GO:2000785;GO:0000285;GO:0046854;GO:0010008	-	-
ENSRNOG00000060277	AABR07014745.1	14[-]29645344-29650937	0	0	0	0	0	0	AABR07014745.1	-	-	-	-
ENSRNOG00000045826	AABR07014756.1	14[+]30308423-30308523	0	0	0	0.944082	0.578226	0.939324	AABR07014756.1	-	-	-	-
ENSRNOG00000047135	AABR07014756.2	14[-]30326648-30326746	0	0.116474	0	0	0	0.237527	AABR07014756.2	-	-	-	-
ENSRNOG00000052631	AABR07014769.1	14[-]31002997-31058259	0	0	0	0	0	0	AABR07014769.1	-	-	-	-
ENSRNOG00000024829	AABR07014804.1	14[+]32257805-32258281	2.33976	2.07321	2.40745	3.24128	3.64584	2.68556	AABR07014804.1	-	-	K01527-ko04214 Apoptosis - fly	-
ENSRNOG00000058429	AABR07014820.1	14[-]32671884-32673933	0	0	0	0	0	0	AABR07014820.1	-	-	-	-
ENSRNOG00000051616	AABR07014823.1	14[-]32770151-32773588	0	0	0	0	0	0	AABR07014823.1	-	-	-	-
ENSRNOG00000002127	AABR07014836.1	14[-]33596927-33597359	0.126796	0	0	0.577336	0.113659	0	AABR07014836.1	-	-	-	-
ENSRNOG00000054855	AABR07014855.1	14[-]33960443-33961685	0.767963	0.791674	0.800448	2.19179	1.98249	2.55604	AABR07014855.1	-	-	-	-
ENSRNOG00000058665	AABR07014875.1	14[+]34905408-34906593	0	0	0	0	0	0	AABR07014875.1	-	-	-	-
ENSRNOG00000060110	AABR07014881.1	14[-]35550286-35550355	0.026144	0.026153	0.041269	0.048053	0.065359	0.065127	AABR07014881.1	-	-	-	-
ENSRNOG00000057975	AABR07014882.1	14[-]35756722-35776315	0	0	0	0	0	0	AABR07014882.1	-	-	-	-
ENSRNOG00000053058	AABR07014885.1	14[-]35802251-35803339	0	0	0	0	0	0	AABR07014885.1	-	-	-	-
ENSRNOG00000052390	AABR07014897.1	14[-]36889843-36890552	0	0	0	0	0	0	AABR07014897.1	-	-	-	-
ENSRNOG00000058471	AABR07014897.2	14[+]36981795-37006786	0	0	0	0	0	0	AABR07014897.2	-	-	-	-
ENSRNOG00000050406	AABR07014914.1	14[+]38493198-38493284	0	0	0	0	0	0	AABR07014914.1	-	-	-	-
ENSRNOG00000047789	AABR07014925.1	14[+]39271201-39271293	0	0	0	0	0	0	AABR07014925.1	-	-	-	-
ENSRNOG00000041606	AABR07014980.1	14[-]42525300-42525365	0	0	0	0	0	0	AABR07014980.1	-	-	-	-
ENSRNOG00000041525	AABR07014983.1	14[+]42763725-42763857	0	0	0	0	0	0	AABR07014983.1	-	-	-	-
ENSRNOG00000052897	AABR07014983.2	14[+]42717864-42718114	0	0	0	0	0	0	AABR07014983.2	-	-	-	-
ENSRNOG00000059475	AABR07014987.1	14[+]43166370-43171890	0	0	0	0	0	0	AABR07014987.1	-	-	-	-
ENSRNOG00000056869	AABR07015002.1	14[+]44556910-44558192	0	0	0	0	0.031198	0.051319	AABR07015002.1	-	-	-	-
ENSRNOG00000021986	AABR07015006.1	14[+]44790211-44791175	0.38923	0.27754	0.246247	0.511127	0.907967	0.757036	AABR07015006.1	-	-	-	-
ENSRNOG00000054706	AABR07015007.1	14[-]44872369-44876994	0	0	0.04971	0	0	0	AABR07015007.1	-	-	-	-
ENSRNOG00000056503	AABR07015015.1	14[-]45395343-45396315	0	0	0	0	0	0	AABR07015015.1	-	-	-	-
ENSRNOG00000057505	AABR07015015.2	14[-]45375663-45376127	0.449952	0.370715	0.331371	0.125831	0.067806	0.173526	AABR07015015.2	-	GO:0005840;GO:0006412;GO:0003735;GO:0005622;GO:0030529	K02905-ko03010 Ribosome	-
ENSRNOG00000056778	AABR07015040.1	14[+]46286197-46287505	1.45587	1.56707	1.42965	2.48994	2.71265	2.87889	AABR07015040.1	-	-	-	-
ENSRNOG00000061254	AABR07015042.1	14[-]46329996-46330044	0.410241	0.023775	0.106642	0.066797	0.19217	0.356783	AABR07015042.1	-	-	-	-
ENSRNOG00000056747	AABR07015055.1	14[+]46523589-46523999	2.36886	1.27334	1.29321	0.140495	0.551973	0.217377	AABR07015055.1	-	-	-	-
ENSRNOG00000057811	AABR07015055.2	14[+]46525123-46525171	0.282103	0.0951	0.20598	0.267868	0.448954	0.51002	AABR07015055.2	-	-	-	-
ENSRNOG00000050545	AABR07015056.1	14[+]46525889-46525945	8.29584	3.25301	3.01634	2.63232	4.75248	2.86944	AABR07015056.1	-	-	-	-
ENSRNOG00000046600	AABR07015066.1	14[+]46588406-46588816	14.1074	6.33002	6.67986	1.19921	3.00749	1.65242	AABR07015066.1	-	-	-	-
ENSRNOG00000054657	AABR07015067.1	14[+]46590427-46590483	4.36998	1.54788	1.69138	1.58803	2.54993	1.59424	AABR07015067.1	-	-	-	-
ENSRNOG00000055956	AABR07015078.1	14[+]46649971-46650381	19.7089	9.40629	10.1186	1.74549	4.18674	2.50012	AABR07015078.1	-	-	-	-
ENSRNOG00000059504	AABR07015078.2	14[-]46649976-46650359	0.002739	0.130765	0	0	0	0	AABR07015078.2	-	-	-	-
ENSRNOG00000046081	AABR07015079.1	14[+]46652302-46652350	2.76547	1.11997	1.17546	0.51597	0.756292	0.992902	AABR07015079.1	-	-	-	-
ENSRNOG00000057514	AABR07015080.1	14[+]46654573-46654621	1.50965	0.6395	0.812965	0.355113	0.588059	0.66541	AABR07015080.1	-	-	-	-
ENSRNOG00000059586	AABR07015080.2	14[+]46653035-46653445	2.33666	1.1099	0.790214	0.089944	0.601891	0.052647	AABR07015080.2	-	-	-	-
ENSRNOG00000047351	AABR07015081.1	14[+]46655342-46655398	17.4197	7.54117	6.09136	4.50394	9.3812	5.6934	AABR07015081.1	-	-	-	-
ENSRNOG00000058903	AABR07015112.1	14[+]47265107-47269083	0	0	0	0	0	0	AABR07015112.1	-	-	-	-
ENSRNOG00000057821	AABR07015165.1	14[+]48169730-48173141	1.70767	1.41808	1.49239	2.66119	2.51769	2.41948	AABR07015165.1	-	-	-	-
ENSRNOG00000026134	AABR07015180.1	14[-]48270202-48271670	0.000928	0	0	0.026297	0.019756	0.027655	AABR07015180.1	-	-	-	-
ENSRNOG00000022882	AABR07015294.1	14[+]51439095-51439974	2.40266	2.03286	2.43504	1.51355	2.38583	2.23963	AABR07015294.1	-	-	-	-
ENSRNOG00000058176	AABR07015320.1	14[+]51959745-51961153	0	0	0	0	0	0	AABR07015320.1	-	GO:0006508;GO:0005634;GO:0004175;GO:0008234;GO:0016929;GO:0016926	-	-
ENSRNOG00000027791	AABR07015346.1	14[+]52661966-52662217	3.69256	2.1499	3.84208	1.78754	2.60165	2.43454	AABR07015346.1	-	-	-	-
ENSRNOG00000058705	AABR07015358.1	14[+]53046126-53049565	0	0	0	0	0	0	AABR07015358.1	-	-	-	-
ENSRNOG00000056871	AABR07015394.1	14[+]53771728-53774609	0	0	0	0	0	0	AABR07015394.1	-	-	-	-
ENSRNOG00000051674	AABR07015399.1	14[+]53798572-53806745	0	0	0	0	0	0	AABR07015399.1	-	-	-	-
ENSRNOG00000061025	AABR07015467.1	14[+]58196843-58213307	0	0	0	0	0	0	AABR07015467.1	-	-	-	-
ENSRNOG00000055970	AABR07015468.1	14[+]58282719-58289795	0	0	0	0	0	0	AABR07015468.1	-	-	-	-
ENSRNOG00000057727	AABR07015500.1	14[+]59811526-59811665	0	0	0	0	0	0	AABR07015500.1	-	-	-	-
ENSRNOG00000050890	AABR07015510.1	14[+]60599307-60599395	0	0	0	0	0	0	AABR07015510.1	-	-	-	-
ENSRNOG00000058054	AABR07015517.1	14[+]61298736-61299894	0	0	0	0	0	0	AABR07015517.1	-	-	-	-
ENSRNOG00000058688	AABR07015517.2	14[+]61116674-61122664	0	0	0	0	0	0	AABR07015517.2	-	-	-	-
ENSRNOG00000061322	AABR07015517.3	14[+]61101448-61112324	0	0	0	0	0	0	AABR07015517.3	-	-	-	-
ENSRNOG00000056900	AABR07015525.1	14[+]61750489-61750653	0	0	0	0	0	0	AABR07015525.1	-	-	-	-
ENSRNOG00000049999	AABR07015531.1	14[+]62157844-62157942	0	0	0	0	0	0	AABR07015531.1	-	-	-	-
ENSRNOG00000058778	AABR07015547.1	14[+]62674435-62677678	0	0	0	0	0	0	AABR07015547.1	-	-	-	-
ENSRNOG00000045758	AABR07015555.1	14[-]63295449-63295584	0	0	0	0	0	0	AABR07015555.1	-	-	-	-
ENSRNOG00000047460	AABR07015556.1	14[-]63307838-63307973	0	0	0	0	0	0	AABR07015556.1	-	-	-	-
ENSRNOG00000055015	AABR07015559.1	14[+]63405408-63440383	0	0	0	0	0	0	AABR07015559.1	-	GO:0006278;GO:0003964	-	-
ENSRNOG00000047320	AABR07015582.1	14[+]64499668-64499791	0	0	0	0	0	0	AABR07015582.1	-	-	-	-
ENSRNOG00000050726	AABR07015582.2	14[-]64482863-64482956	0.014084	0	0	0	0	0	AABR07015582.2	-	-	-	-
ENSRNOG00000048944	AABR07015596.1	14[-]65152594-65153013	0	0	0	0	0	0	AABR07015596.1	-	GO:0016021;GO:0016020;GO:0009607	-	-
ENSRNOG00000036375	AABR07015608.1	14[-]66535979-66536091	0.008787	0	0	0.006502	0	0	AABR07015608.1	-	-	-	-
ENSRNOG00000060489	AABR07015639.1	14[-]68165110-68170629	0	0	0	0.00195	0	0.010843	AABR07015639.1	-	-	-	-
ENSRNOG00000059908	AABR07015647.1	14[-]68600241-68607897	0	0	0	0	0	0	AABR07015647.1	-	-	-	-
ENSRNOG00000061727	AABR07015647.2	14[-]68659432-68662188	0	0	0	0	0	0	AABR07015647.2	-	-	-	-
ENSRNOG00000057570	AABR07015648.1	14[-]68699009-68704287	0	0	0	0	0	0	AABR07015648.1	-	-	-	-
ENSRNOG00000054995	AABR07015652.1	14[-]68790366-68796435	0	0	0	0	0	0	AABR07015652.1	-	-	-	-
ENSRNOG00000054916	AABR07015654.1	14[-]68801953-68876626	0	0	0	0	0	0	AABR07015654.1	-	-	-	-
ENSRNOG00000059284	AABR07015674.1	14[-]69508871-69510153	0	0	0	0.007445	0.008695	0.014966	AABR07015674.1	-	-	-	-
ENSRNOG00000060369	AABR07015687.1	14[-]70477824-70478938	0	0	0	0	0	0	AABR07015687.1	-	-	-	-
ENSRNOG00000053383	AABR07015705.1	14[-]71308075-71309273	0	0	0	0	0	0	AABR07015705.1	-	-	-	-
ENSRNOG00000005077	AABR07015719.1	14[+]72259408-72259869	3.61421	4.22277	4.48316	5.93596	5.99496	5.65222	AABR07015719.1	-	-	-	-
ENSRNOG00000049420	AABR07015737.1	14[+]73167565-73167678	0	0	0	0	0	0	AABR07015737.1	-	-	-	-
ENSRNOG00000060498	AABR07015761.1	14[+]74325343-74329594	0	0	0	0	0	0	AABR07015761.1	-	-	-	-
ENSRNOG00000054226	AABR07015783.1	14[-]76145775-76153319	0	0	0	0	0	0	AABR07015783.1	-	-	-	-
ENSRNOG00000055215	AABR07015784.1	14[+]76272968-76282176	0	0	0	0	0	0	AABR07015784.1	-	-	-	-
ENSRNOG00000059384	AABR07015791.1	14[-]76473070-76475543	0	0	0	0	0	0	AABR07015791.1	-	-	-	-
ENSRNOG00000054201	AABR07015800.1	14[-]77651974-77668604	0	0	0	0	0	0	AABR07015800.1	-	-	-	-
ENSRNOG00000054686	AABR07015800.2	14[-]77660285-77664208	0	0	0	0	0	0	AABR07015800.2	-	-	-	-
ENSRNOG00000038427	AABR07015812.1	14[-]78359682-78377825	0	0	0	0	0	0	AABR07015812.1	-	-	-	-
ENSRNOG00000054484	AABR07015812.2	14[-]78393083-78398305	0	0	0	0	0	0	AABR07015812.2	-	-	-	-
ENSRNOG00000043857	AABR07015814.1	14[+]78549347-78549451	0	0	0	0	0	0	AABR07015814.1	-	-	-	-
ENSRNOG00000048860	AABR07015834.1	14[+]79200390-79200491	0	0	0	0	0	0	AABR07015834.1	-	-	-	-
ENSRNOG00000054242	AABR07015838.1	14[+]79667103-79667233	0	0	0	0	0	0	AABR07015838.1	-	-	-	-
ENSRNOG00000061069	AABR07015838.2	14[-]79635782-79635840	0	0	0	0	0	0	AABR07015838.2	-	-	-	-
ENSRNOG00000060138	AABR07015846.1	14[-]80605796-80625363	0.024527	0.015424	0.022545	0.021189	0.027535	0.060448	AABR07015846.1	-	-	-	-
ENSRNOG00000052531	AABR07015855.1	14[-]81426148-81426209	0	0	0	0	0	0.324348	AABR07015855.1	-	-	-	-
ENSRNOG00000059624	AABR07015889.1	14[+]84136887-84137211	1.54145	1.33433	1.01756	3.18055	2.18965	3.17362	AABR07015889.1	-	-	-	-
ENSRNOG00000055280	AABR07015903.1	14[+]85134591-85134648	0.001678	0	0.003085	0.008637	0	0	AABR07015903.1	-	-	-	-
ENSRNOG00000054716	AABR07015907.1	14[-]85236451-85236689	0	0	0	0	0	0	AABR07015907.1	-	-	-	-
ENSRNOG00000057861	AABR07015907.2	14[+]85277041-85277149	0	0	0	0	0	0.013391	AABR07015907.2	-	-	-	-
ENSRNOG00000052037	AABR07015917.1	14[+]86100050-86101181	0	0	0.028559	0	0	0	AABR07015917.1	-	-	-	-
ENSRNOG00000058474	AABR07015941.1	14[-]86952005-86952292	8.35326	6.96353	7.93229	4.53058	6.20634	7.73491	AABR07015941.1	-	-	-	-
ENSRNOG00000058513	AABR07015941.2	14[-]86979280-86980017	0	0	0	0	0	0	AABR07015941.2	-	-	-	-
ENSRNOG00000057726	AABR07015942.1	14[+]87140345-87141830	0	0	0	0	0	0	AABR07015942.1	-	-	-	-
ENSRNOG00000055092	AABR07015966.1	14[+]88183993-88221984	0	0	0	0	0	0	AABR07015966.1	-	-	-	-
ENSRNOG00000061615	AABR07015977.1	14[+]88874295-88874600	0	0	0	0	0	0	AABR07015977.1	-	GO:0003735;GO:0005840;GO:0006412;GO:0005622;GO:0002181;GO:0022625;GO:0030529	-	-
ENSRNOG00000051567	AABR07015994.1	14[-]89897851-89947849	0	0	0	0	0	0	AABR07015994.1	-	-	-	-
ENSRNOG00000060971	AABR07016056.1	14[-]92951531-92967908	0	0	0	0	0	0	AABR07016056.1	-	-	-	-
ENSRNOG00000056762	AABR07016058.1	14[+]93084992-93086797	0	0	0	0	0	0	AABR07016058.1	-	-	-	-
ENSRNOG00000050592	AABR07016166.1	14[+]94776233-94777042	0	0	0	0	0	0	AABR07016166.1	-	GO:0007276	-	-
ENSRNOG00000048867	AABR07016310.1	14[+]96499520-96502483	0	0	0	0	0	0	AABR07016310.1	-	GO:0007276	-	-
ENSRNOG00000053463	AABR07016310.2	14[-]96534182-96538106	0	0	0	0	0	0	AABR07016310.2	-	-	-	-
ENSRNOG00000055299	AABR07016365.1	14[-]98015942-98018748	0	0	0	0	0	0	AABR07016365.1	-	-	-	-
ENSRNOG00000051775	AABR07016412.1	14[+]99672025-99672356	0	0	0	0	0	0	AABR07016412.1	-	-	-	-
ENSRNOG00000051014	AABR07016418.1	14[-]99787729-99788111	0	0	0	0	0	0	AABR07016418.1	-	-	-	-
ENSRNOG00000060432	AABR07016545.1	14[-]102809291-102878662	0	0	0	0	0	0	AABR07016545.1	-	-	-	-
ENSRNOG00000036373	AABR07016556.1	14[-]103358243-103358338	0	0	0	0	0	0	AABR07016556.1	-	-	-	-
ENSRNOG00000040438	AABR07016556.2	14[-]103393831-103393897	0	0	0	0	0	0	AABR07016556.2	-	-	-	-
ENSRNOG00000058894	AABR07016556.3	14[-]103457254-103457654	0	0	0	0	0	0	AABR07016556.3	-	-	-	-
ENSRNOG00000054704	AABR07016558.1	14[-]103712269-103714040	0	0	0	0	0	0	AABR07016558.1	-	-	-	-
ENSRNOG00000055797	AABR07016558.2	14[+]103712269-103713114	0	0	0	0	0	0	AABR07016558.2	-	-	-	-
ENSRNOG00000059123	AABR07016559.1	14[-]103886952-103888005	0	0	0	0.055001	0	0	AABR07016559.1	-	-	-	-
ENSRNOG00000051648	AABR07016566.1	14[+]104394200-104397984	0	0	0	0	0	0	AABR07016566.1	-	-	-	-
ENSRNOG00000061005	AABR07016572.1	14[+]104708648-104715786	6.13309	5.70514	6.03609	4.7679	3.95952	4.59284	AABR07016572.1	-	-	-	-
ENSRNOG00000054236	AABR07016573.1	14[+]104764233-104768948	0	0	0	0.149942	0	0.073051	AABR07016573.1	-	-	-	-
ENSRNOG00000042277	AABR07016578.1	14[-]105069167-105069565	0	0	0	0	0	0	AABR07016578.1	-	GO:0022627;GO:0003735;GO:0005840;GO:0006412;GO:0005622;GO:0030529	-	KOG3406-40S ribosomal protein S12[J]
ENSRNOG00000054531	AABR07016578.2	14[-]105138086-105141787	0.042202	0	0.083098	0.071913	0.142238	0.253807	AABR07016578.2	-	-	-	-
ENSRNOG00000056722	AABR07016578.3	14[+]105083805-105085260	0.086985	0	0.056069	0.259374	0	0.06152	AABR07016578.3	-	-	-	-
ENSRNOG00000053517	AABR07016586.1	14[+]105353496-105431596	0	0	0	0	0	0	AABR07016586.1	-	-	-	-
ENSRNOG00000052148	AABR07016589.1	14[+]105480282-105485690	0	0	0	0	0	0	AABR07016589.1	-	-	-	-
ENSRNOG00000061602	AABR07016592.1	14[+]105914769-105925662	1.6701	0.66274	0.544862	6.54988	5.35674	4.39854	AABR07016592.1	-	-	-	-
ENSRNOG00000059730	AABR07016619.1	14[+]107178838-107180336	0	0	0	0	0	0	AABR07016619.1	-	GO:0005615;GO:0005186	-	-
ENSRNOG00000056139	AABR07016621.1	14[+]107263230-107264677	0	0	0	0	0	0	AABR07016621.1	-	-	-	-
ENSRNOG00000053274	AABR07016633.1	14[-]108273769-108273859	0.148209	0.071892	0.107263	0.08073	0.072316	0.099757	AABR07016633.1	-	-	-	-
ENSRNOG00000051932	AABR07016635.1	14[-]108438143-108438526	0	0	0	0	0	0	AABR07016635.1	-	-	-	-
ENSRNOG00000037522	AABR07016640.1	14[+]108915784-108916171	0	0	0	0.05509	0	0.219854	AABR07016640.1	-	-	-	-
ENSRNOG00000045800	AABR07016640.2	14[-]108818499-108818575	0	0	0	0	0	0	AABR07016640.2	-	-	-	-
ENSRNOG00000041575	AABR07016650.1	14[-]109420900-109421041	0	0	0	0	0	0	AABR07016650.1	-	-	-	-
ENSRNOG00000053953	AABR07016672.1	14[+]110126049-110164535	0	0	0	0	0	0	AABR07016672.1	-	-	-	-
ENSRNOG00000055024	AABR07016674.1	14[-]110102635-110234277	0	0	0	0	0	0	AABR07016674.1	-	-	-	-
ENSRNOG00000059583	AABR07016692.1	14[+]110883578-110883893	0	0	0	0	0	0	AABR07016692.1	-	-	-	-
ENSRNOG00000053683	AABR07016703.1	14[+]111370037-111441277	0	0	0	0	0	0	AABR07016703.1	-	-	-	-
ENSRNOG00000057717	AABR07016721.1	14[-]112422955-112467189	0	0	0	0	0	0	AABR07016721.1	-	-	-	-
ENSRNOG00000060106	AABR07016722.1	14[+]112606173-112607740	0	0	0	0	0	0	AABR07016722.1	-	-	-	-
ENSRNOG00000054144	AABR07016731.1	14[+]113149496-113150077	0	0	0	0	0	0	AABR07016731.1	-	-	-	-
ENSRNOG00000060804	AABR07016731.2	14[-]112969358-112997438	0	0	0	0	0	0	AABR07016731.2	-	-	-	-
ENSRNOG00000036370	AABR07016769.1	14[+]113755185-113755274	0	0	0	0	0	0	AABR07016769.1	-	-	-	-
ENSRNOG00000052764	AABR07016779.1	14[-]114029162-114047527	0.071663	0.260464	0	0	0.966823	0.388047	AABR07016779.1	-	GO:0005747;GO:0032981	K03938-ko00190 Oxidative phosphorylation;ko05010 Alzheimer's disease;ko05012 Parkinson's disease;ko05016 Huntington's disease;ko04932 Non-alcoholic fatty liver disease (NAFLD)	-
[truncated: 30,624 more rows]

## Sheet: selected
		control			0.75
Gene ID	Gene Name	FPKM (B1)	FPKM (B2)	FPKM (B3)	FPKM (D1)	FPKM (D2)	FPKM (D3)	GeneName	GeneDescription	Pos.
ENSRNOG00000010064	Abcc4	2.21293	2.64515	2.61784	1.09523	1.01936	1.36637	Abcc4	ATP binding cassette subfamily C member 4	15[-]103696557-103927592		KOG0054-Multidrug resistance-associated protein/mitoxantrone resistance protein, ABC superfamily[Q]
ENSRNOG00000007041	Abcg2	4.78814	3.21672	3.24286	8.04309	8.80268	8.69972	Abcg2	ATP-binding cassette, subfamily G (WHITE), member 2	4[+]88832178-88890621		KOG0061-Transporter, ABC superfamily (Breast cancer resistance protein)[Q]
ENSRNOG00000012681	Lgals9	125.789	133.345	98.3543	132.431	123.088	121.978	Lgals9	galectin 9	10[+]64737022-64760201		KOG3587-Galectin, galactose-binding lectin[W]
ENSRNOG00000042692	Slc17a1	9.55024	7.84274	9.44657	27.3263	27.6336	25.0404	Slc17a1	solute carrier family 17 member 1	17[-]43477600-43504604		KOG2532-Permease of the major facilitator superfamily[G]
ENSRNOG00000018215	Slc22a6	0.367667	0.483486	0.082877	0	0.126574	0.041613	Slc22a6	solute carrier family 22 member 6	1[+]224824799-224833259		KOG0255-Synaptic vesicle transporter SVOP and related transporters (major facilitator superfamily)[R]
ENSRNOG00000021108	Slc22a12	0.041345	0.064978	0.028334	0.037668	0	0	Slc22a12	solute carrier family 22 member 12	1[-]221910767-221919301		KOG0255-Synaptic vesicle transporter SVOP and related transporters (major facilitator superfamily)[R]
ENSRNOG00000056476	Slc22a13	0	0	0.035731	0.023391	0	0.024218	Slc22a13	solute carrier family 22 member 13	8[-]127885268-127900463		KOG0255-Synaptic vesicle transporter SVOP and related transporters (major facilitator superfamily)[R]
ENSRNOG00000018086	Slc22a8	106.356	96.7001	78.0593	90.0185	89.6981	88.226	Slc22a8	solute carrier family 22 member 8	1[+]224800252-224818482		-
ENSRNOG00000005900	Slc2a6	0.465639	0.987125	0.378964	0.453515	0.551397	0.718282	Slc2a6	solute carrier family 2 member 6	3[-]5568321-5575136		KOG0254-Predicted transporter (major facilitator superfamily)[R]
ENSRNOG00000005302	Slc2a9	10.8296	10.9688	10.7909	6.50232	6.08999	6.46217	Slc2a9	solute carrier family 2 member 9	14[+]77067503-77192702		KOG0569-Permease of the major facilitator superfamily[G]
ENSRNOG00000010265	Ada	2.0532	1.91199	1.46692	1.67441	1.93936	1.99073	Ada	adenosine deaminase	3[-]160115842-160139947		KOG1097-Adenine deaminase/adenosine deaminase[F]
ENSRNOG00000007081	Xdh	59.3654	66.8272	58.0834	22.9732	19.3086	26.3093	Xdh	xanthine dehydrogenase	6[-]25149235-25211494		KOG0430-Xanthine dehydrogenase[F]
ENSRNOG00000018282	Gda	10.418	11.8158	8.40632	5.47288	5.0139	8.81612	Gda	guanine deaminase	1[-]238982392-239057732		KOG3968-Atrazine chlorohydrolase/guanine deaminase[FQ]
ENSRNOG00000014405	Aprt	74.7046	66.2879	75.8592	26.1198	28.6072	28.8561	Aprt	adenine phosphoribosyl transferase	19[-]55387288-55389256		KOG1712-Adenine phosphoribosyl transferases[F]
ENSRNOG00000048561	Hprt1	16.1568	13.0788	12.2849	11.019	11.0119	10.1254	Hprt1	hypoxanthine phosphoribosyltransferase 1	X[-]158197149-158228749		KOG3367-Hypoxanthine-guanine phosphoribosyltransferase[F]
ENSRNOG00000009982	Pnp	237.424	217.002	207.639	126.228	131.316	131.752	Pnp	purine nucleoside phosphorylase	15[+]27875911-27883350		KOG3984-Purine nucleoside phosphorylase[F]
ENSRNOG00000015354	Aox1	19.5831	24.1651	19.0809	104.667	108.425	104.218	Aox1	aldehyde oxidase 1	9[+]64929721-65007870		KOG0430-Xanthine dehydrogenase[F]
ENSRNOG00000016339	Uox	228.464	182.636	205.582	358.958	388.886	355.562	Uox	urate oxidase	2[+]252452269-252488396		KOG1599-Uricase (urate oxidase)[Q]
Gene ID	Gene Name	control-Mean	control-SD		75%-mean	75%-SD		GeneName	GeneDescription	Pos.
ENSRNOG00000010064	Abcc4	2.49198	0.242045		1.16032	0.182434		Abcc4	ATP binding cassette subfamily C member 4	15[-]103696557-103927592
ENSRNOG00000007041	Abcg2	3.74924	0.899807		8.51516	0.412055		Abcg2	ATP-binding cassette, subfamily G (WHITE), member 2	4[+]88832178-88890621
ENSRNOG00000012681	Lgals9	119.163	18.4126		125.832	5.74145		Lgals9	galectin 9	10[+]64737022-64760201
ENSRNOG00000042692	Slc17a1	8.94651	0.957304		26.6668	1.41683		Slc17a1	solute carrier family 17 member 1	17[-]43477600-43504604
ENSRNOG00000018215	Slc22a6	0.311343	0.206158		0.0560623	0.0645123		Slc22a6	solute carrier family 22 member 6	1[+]224824799-224833259
ENSRNOG00000021108	Slc22a12	0.0448857	0.0185768		0.012556	0.0217476		Slc22a12	solute carrier family 22 member 12	1[-]221910767-221919301
ENSRNOG00000056476	Slc22a13	0.0119103	0.0206293		0.0158697	0.0137498		Slc22a13	solute carrier family 22 member 13	8[-]127885268-127900463
ENSRNOG00000018086	Slc22a8	93.7051	14.3841		89.3142	0.95593		Slc22a8	solute carrier family 22 member 8	1[+]224800252-224818482
ENSRNOG00000005900	Slc2a6	0.610576	0.328968		0.574398	0.133874		Slc2a6	solute carrier family 2 member 6	3[-]5568321-5575136
ENSRNOG00000005302	Slc2a9	10.8631	0.0935798		6.35149	0.227352		Slc2a9	solute carrier family 2 member 9	14[+]77067503-77192702
ENSRNOG00000010265	Ada	1.8107	0.30598		1.86817	0.169753		Ada	adenosine deaminase	3[-]160115842-160139947
ENSRNOG00000007081	Xdh	61.4253	4.72189		22.8637	3.50162		Xdh	xanthine dehydrogenase	6[-]25149235-25211494
ENSRNOG00000018282	Gda	10.2134	1.71393		6.4343	2.07544		Gda	guanine deaminase	1[-]238982392-239057732
ENSRNOG00000014405	Aprt	72.2839	5.22465		27.861	1.5131		Aprt	adenine phosphoribosyl transferase	19[-]55387288-55389256
ENSRNOG00000048561	Hprt1	13.8402	2.04518		10.7188	0.513877		Hprt1	hypoxanthine phosphoribosyltransferase 1	X[-]158197149-158228749
ENSRNOG00000009982	Pnp	220.688	15.2306		129.765	3.07133		Pnp	purine nucleoside phosphorylase	15[+]27875911-27883350
ENSRNOG00000015354	Aox1	20.943	2.80167		105.77	2.31		Aox1	aldehyde oxidase 1	9[+]64929721-65007870
ENSRNOG00000016339	Uox	205.56	22.9139		367.802	18.3378		Uox	urate oxidase	2[+]252452269-252488396
Gene ID	Gene Name	control-Mean	control-SD		75%-mean	75%-SD		GeneName	GeneDescription	Pos.
ENSRNOG00000010064	Abcc4	2.49	0.24	±	1.16	0.18	±	Abcc4	ATP binding cassette subfamily C member 4	15[-]103696557-103927592
ENSRNOG00000007041	Abcg2	3.75	0.9	±	8.52	0.41	±	Abcg2	ATP-binding cassette, subfamily G (WHITE), member 2	4[+]88832178-88890621
ENSRNOG00000012681	Lgals9	119.16	18.41	±	125.83	5.74	±	Lgals9	galectin 9	10[+]64737022-64760201
ENSRNOG00000042692	Slc17a1	8.95	0.96	±	26.67	1.42	±	Slc17a1	solute carrier family 17 member 1	17[-]43477600-43504604
ENSRNOG00000018215	Slc22a6	0.31	0.21	±	0.06	0.06	±	Slc22a6	solute carrier family 22 member 6	1[+]224824799-224833259
ENSRNOG00000021108	Slc22a12	0.04	0.02	±	0.01	0.02	±	Slc22a12	solute carrier family 22 member 12	1[-]221910767-221919301
ENSRNOG00000056476	Slc22a13	0.01	0.02	±	0.02	0.01	±	Slc22a13	solute carrier family 22 member 13	8[-]127885268-127900463
ENSRNOG00000018086	Slc22a8	93.71	14.38	±	89.31	0.96	±	Slc22a8	solute carrier family 22 member 8	1[+]224800252-224818482
ENSRNOG00000005900	Slc2a6	0.61	0.33	±	0.57	0.13	±	Slc2a6	solute carrier family 2 member 6	3[-]5568321-5575136
ENSRNOG00000005302	Slc2a9	10.86	0.09	±	6.35	0.23	±	Slc2a9	solute carrier family 2 member 9	14[+]77067503-77192702
ENSRNOG00000010265	Ada	1.81	0.31	±	1.87	0.17	±	Ada	adenosine deaminase	3[-]160115842-160139947
ENSRNOG00000007081	Xdh	61.43	4.72	±	22.86	3.5	±	Xdh	xanthine dehydrogenase	6[-]25149235-25211494
ENSRNOG00000018282	Gda	10.21	1.71	±	6.43	2.08	±	Gda	guanine deaminase	1[-]238982392-239057732
ENSRNOG00000014405	Aprt	72.28	5.22	±	27.86	1.51	±	Aprt	adenine phosphoribosyl transferase	19[-]55387288-55389256
ENSRNOG00000048561	Hprt1	13.84	2.05	±	10.72	0.51	±	Hprt1	hypoxanthine phosphoribosyltransferase 1	X[-]158197149-158228749
ENSRNOG00000009982	Pnp	220.69	15.23	±	129.77	3.07	±	Pnp	purine nucleoside phosphorylase	15[+]27875911-27883350
ENSRNOG00000015354	Aox1	20.94	2.8	±	105.77	2.31	±	Aox1	aldehyde oxidase 1	9[+]64929721-65007870
ENSRNOG00000016339	Uox	205.56	22.91	±	367.8	18.34	±	Uox	urate oxidase	2[+]252452269-252488396
		Control			0.75	P
	Abcc4	2.49±0.24			1.16±0.18	0.00160049				0
	Abcg2	3.75±0.9			8.52±0.41	0.00112919
	Lgals9	119.16±18.41			125.83±5.74	0.581481
	Slc17a1	8.95±0.96			26.67±1.42	5.66244e-05
	Slc22a6	0.31±0.21			0.06±0.06	0.110079
	Slc22a12	0.04±0.02			0.01±0.02	0.121861
	Slc22a13	0.01±0.02			0.02±0.01	0.79578
	Slc22a8	93.71±14.38			89.31±0.96	0.625708
	Slc2a6	0.61±0.33			0.57±0.13	0.868528
	Slc2a9	10.86±0.09			6.35±0.23	5.84069e-06
	Ada	1.81±0.31			1.87±0.17	0.790178
	Xdh	61.43±4.72			22.86±3.5	0.000342193
	Gda	10.21±1.71			6.43±2.08	0.0718413
	Aprt	72.28±5.22			27.86±1.51	0.000144988
	Hprt1	13.84±2.05			10.72±0.51	0.0623853
	Pnp	220.69±15.23			129.77±3.07	0.000533379
	Aox1	20.94±2.8			105.77±2.31	2.22944e-06
	Uox	205.56±22.91			367.8±18.34	0.000664747
