# Supplementary material for: Dieting alleviates hyperuricemia and organ injuries in uricase-deficient rats via down-regulating cell cycle pathway
Source: PeerJ. 2023 Sep 8;11:e15999. doi: 10.7717/peerj.15999 (PMC10494837; doi:10.7717/peerj.15999)
Supplement: Supplemental Information 36 [file peerj-11-15999-s036.xlsx]

## Sheet: down
id	Description	Significant	Annotated	Pvalue	Qvalue
ko04110	Cell cycle	46/1021	120/7817	1.95987e-12	3.91973e-10
ko04111	Cell cycle - yeast	32/1021	73/7817	7.79536e-11	7.79536e-09
ko04115	p53 signaling pathway	29/1021	68/7817	1.3397e-09	8.93135e-08
ko03013	RNA transport	47/1021	177/7817	8.90398e-07	4.45199e-05
ko04120	Ubiquitin mediated proteolysis	40/1021	145/7817	2.05651e-06	8.22606e-05
ko03460	Fanconi anemia pathway	20/1021	52/7817	3.49944e-06	0.000116648
ko04068	FoxO signaling pathway	35/1021	128/7817	1.09728e-05	0.000313508
ko04113	Meiosis - yeast	20/1021	60/7817	4.14636e-05	0.000921414
ko04214	Apoptosis - fly	20/1021	60/7817	4.14636e-05	0.000921414
ko04921	Oxytocin signaling pathway	39/1021	158/7817	4.6471e-05	0.00092942
ko04914	Progesterone-mediated oocyte maturation	25/1021	86/7817	6.55848e-05	0.00110651
ko04728	Dopaminergic synapse	34/1021	133/7817	6.63907e-05	0.00110651
ko03040	Spliceosome	36/1021	145/7817	7.91752e-05	0.00121808
ko04013	MAPK signaling pathway - fly	23/1021	83/7817	0.000278724	0.00398177
ko04114	Oocyte meiosis	28/1021	112/7817	0.000423451	0.00540741
ko04010	MAPK signaling pathway	52/1021	252/7817	0.000432593	0.00540741
ko04710	Circadian rhythm	11/1021	28/7817	0.000459732	0.00540861
ko04621	NOD-like receptor signaling pathway	16/1021	54/7817	0.00105036	0.0107458
ko04922	Glucagon signaling pathway	24/1021	96/7817	0.00106379	0.0107458
ko04215	Apoptosis - multiple species	12/1021	35/7817	0.00107458	0.0107458
ko04350	TGF-beta signaling pathway	21/1021	82/7817	0.00154306	0.0146958
ko04211	Longevity regulating pathway - mammal	22/1021	89/7817	0.00197516	0.017956
ko04152	AMPK signaling pathway	28/1021	126/7817	0.00292135	0.0254031
ko04668	TNF signaling pathway	25/1021	110/7817	0.00349085	0.0280024
ko03015	mRNA surveillance pathway	22/1021	93/7817	0.00355675	0.0280024
ko04212	Longevity regulating pathway - worm	18/1021	71/7817	0.00366038	0.0280024
ko03018	RNA degradation	21/1021	88/7817	0.00389211	0.0280024
ko04622	RIG-I-like receptor signaling pathway	17/1021	66/7817	0.00392034	0.0280024
ko04062	Chemokine signaling pathway	35/1021	171/7817	0.00408905	0.0282004
ko04144	Endocytosis	50/1021	269/7817	0.00556143	0.0368313
ko03420	Nucleotide excision repair	13/1021	47/7817	0.0058139	0.0368313
ko04912	GnRH signaling pathway	21/1021	91/7817	0.00589301	0.0368313
ko03060	Protein export	8/1021	23/7817	0.00660379	0.0400229
ko04340	Hedgehog signaling pathway	12/1021	43/7817	0.00733378	0.0405881
ko04624	Toll and Imd signaling pathway	12/1021	43/7817	0.00733378	0.0405881
ko04540	Gap junction	20/1021	87/7817	0.00742425	0.0405881
ko03030	DNA replication	11/1021	38/7817	0.0075088	0.0405881
ko03440	Homologous recombination	9/1021	29/7817	0.00931106	0.0483021
ko04130	SNARE interactions in vesicular transport	10/1021	34/7817	0.0094189	0.0483021
ko04713	Circadian entrainment	21/1021	95/7817	0.00980376	0.0490188

## Sheet: up
id	Description	Significant	Annotated	Pvalue	Qvalue
ko01230	Biosynthesis of amino acids	22/570	90/7817	3.09272e-07	6.08777e-05
ko00270	Cysteine and methionine metabolism	13/570	45/7817	1.19111e-05	0.000724734
ko00140	Steroid hormone biosynthesis	16/570	66/7817	1.43203e-05	0.000724734
ko03320	PPAR signaling pathway	18/570	81/7817	1.54578e-05	0.000724734
ko01200	Carbon metabolism	24/570	131/7817	2.11239e-05	0.000724734
ko00680	Methane metabolism	10/570	29/7817	2.20908e-05	0.000724734
ko00100	Steroid biosynthesis	8/570	19/7817	2.79679e-05	0.000786465
ko03010	Ribosome	46/570	346/7817	4.25664e-05	0.000859356
ko04146	Peroxisome	18/570	87/7817	4.30993e-05	0.000859356
ko00220	Arginine biosynthesis	8/570	20/7817	4.36571e-05	0.000859356
ko00260	Glycine, serine and threonine metabolism	11/570	42/7817	0.000149785	0.00268037
ko00071	Fatty acid degradation	11/570	44/7817	0.000234761	0.00371391
ko01210	2-Oxocarboxylic acid metabolism	7/570	19/7817	0.000245277	0.00371391
ko00330	Arginine and proline metabolism	12/570	54/7817	0.000404176	0.00568278
ko00051	Fructose and mannose metabolism	9/570	36/7817	0.000864386	0.0113432
ko00630	Glyoxylate and dicarboxylate metabolism	8/570	30/7817	0.00105701	0.013004
ko00120	Primary bile acid biosynthesis	6/570	18/7817	0.0012723	0.0147319
ko00900	Terpenoid backbone biosynthesis	7/570	26/7817	0.00204448	0.0223578
ko00790	Folate biosynthesis	5/570	14/7817	0.00233005	0.0236772
ko00380	Tryptophan metabolism	10/570	49/7817	0.0024057	0.0236772
ko04978	Mineral absorption	10/570	50/7817	0.00281559	0.0263495
ko00710	Carbon fixation in photosynthetic organisms	8/570	35/7817	0.00307575	0.0263495
ko00010	Glycolysis / Gluconeogenesis	13/570	76/7817	0.0030788	0.0263495
ko00720	Carbon fixation pathways in prokaryotes	5/570	15/7817	0.00328788	0.0264977
ko00830	Retinol metabolism	12/570	68/7817	0.00336535	0.0264977
ko00250	Alanine, aspartate and glutamate metabolism	8/570	38/7817	0.00526789	0.0387005
ko00909	Sesquiterpenoid and triterpenoid biosynthesis	2/570	2/7817	0.00530839	0.0387005
ko04976	Bile secretion	12/570	74/7817	0.00680681	0.0478524
ko00620	Pyruvate metabolism	8/570	40/7817	0.00728547	0.0494513
