# Supplementary material for: Dieting alleviates hyperuricemia and organ injuries in uricase-deficient rats via down-regulating cell cycle pathway
Source: PeerJ. 2023 Sep 8;11:e15999. doi: 10.7717/peerj.15999 (PMC10494837; doi:10.7717/peerj.15999)
Supplement: Supplemental Information 37 [file peerj-11-15999-s037.xlsx]

## Sheet: down
id	Description	Significant	Annotated	Pvalue	Qvalue
ko04110	Cell cycle	16/134	120/7817	1.54496e-10	1.90274e-08
ko03460	Fanconi anemia pathway	10/134	52/7817	1.3418e-08	8.26266e-07
ko04111	Cell cycle - yeast	9/134	73/7817	3.74643e-06	0.000153801
ko04115	p53 signaling pathway	8/134	68/7817	1.88266e-05	0.000579662
ko04113	Meiosis - yeast	7/134	60/7817	6.73742e-05	0.00165953
ko04114	Oocyte meiosis	8/134	112/7817	0.000644368	0.0132265
ko04974	Protein digestion and absorption	7/134	94/7817	0.00110225	0.019393
ko03440	Homologous recombination	4/134	29/7817	0.00140601	0.0216452

## Sheet: up
id	Description	Significant	Annotated	Pvalue	Qvalue
ko03320	PPAR signaling pathway	7/103	81/7817	8.78743e-05	0.0106374
ko04915	Estrogen signaling pathway	7/103	100/7817	0.000329834	0.0183493
ko04010	MAPK signaling pathway	11/103	252/7817	0.000454745	0.0183493
ko00982	Drug metabolism - cytochrome P450	5/103	55/7817	0.000743236	0.0212124
ko00980	Metabolism of xenobiotics by cytochrome P450	5/103	57/7817	0.000876166	0.0212124
ko04152	AMPK signaling pathway	7/103	126/7817	0.00131653	0.0265616
ko00830	Retinol metabolism	5/103	68/7817	0.00194593	0.032784
ko00260	Glycine, serine and threonine metabolism	4/103	42/7817	0.00216659	0.032784
ko04920	Adipocytokine signaling pathway	5/103	74/7817	0.00282593	0.0380095
